# Supplementary material for: Synthesis of iminoisoindolinones via a cascade of the three-component Ugi reaction, palladium catalyzed isocyanide insertion, hydroxylation and an unexpected rearrangement reaction
Source: Royal Society of Chemistry journal article supplement (doi:10.1039/c8ob01728j), 2018-01-01

*Supporting Information*

**Synthesis of Iminoisoindolinones via a Cascade of Three-Component  
Ugi Reaction, Palladium Catalyzed Isocyanide Insertion,  
Hydroxylation and an Unexpected Rearrangement Reaction**

Zhi-Lin Ren, Ping He, Wen-Ting Lu, Mei Sun and Ming-Wu Ding\*

Key Laboratory of Pesticide & Chemical Biology of Ministry of Education, Hubei International Scientific and  
Technological Cooperation Base of Pesticide and Green Synthesis, Central China Normal University, Wuhan,  
430079, P. R. China

e-mail: mwding@mail.ccnu.edu.cn

Content

1. Crystal data and structure refinement for **6q**.....S2
2. Copies of  $^1\text{H}$  and  $^{13}\text{C}$  NMR spectrum of compounds **4** and **6**.....S3-46

## 1. Crystal data and structure refinement for 6q

Crystal data and structure refinement for 6q.

|                                   |                                                                 |                  |
|-----------------------------------|-----------------------------------------------------------------|------------------|
| Identification code               | 6q                                                              |                  |
| Empirical formula                 | C <sub>23</sub> H <sub>28</sub> ClN <sub>3</sub> O <sub>2</sub> |                  |
| Formula weight                    | 413.93                                                          |                  |
| Temperature                       | 297(2) K                                                        |                  |
| Wavelength                        | 0.71073 Å                                                       |                  |
| Crystal system                    | Monoclinic                                                      |                  |
| Space group                       | Cc                                                              |                  |
| Unit cell dimensions              | a = 27.492(6) Å                                                 | α = 90°.         |
|                                   | b = 10.710(2) Å                                                 | β = 131.125(6)°. |
|                                   | c = 20.869(5) Å                                                 | γ = 90°.         |
| Volume                            | 4628.8(18) Å <sup>3</sup>                                       |                  |
| Z                                 | 8                                                               |                  |
| Density (calculated)              | 1.188 Mg/m <sup>3</sup>                                         |                  |
| Absorption coefficient            | 0.187 mm <sup>-1</sup>                                          |                  |
| F(000)                            | 1760                                                            |                  |
| Crystal size                      | 0.200 x 0.200 x 0.100 mm <sup>3</sup>                           |                  |
| Theta range for data collection   | 1.967 to 26.288°.                                               |                  |
| Index ranges                      | -34 ≤ h ≤ 34, -13 ≤ k ≤ 13, -25 ≤ l ≤ 25                        |                  |
| Reflections collected             | 17217                                                           |                  |
| Independent reflections           | 8235 [R(int) = 0.0490]                                          |                  |
| Completeness to theta = 25.242°   | 100.0 %                                                         |                  |
| Absorption correction             | None                                                            |                  |
| Refinement method                 | Full-matrix least-squares on F <sup>2</sup>                     |                  |
| Data / restraints / parameters    | 8235 / 2 / 537                                                  |                  |
| Goodness-of-fit on F <sup>2</sup> | 0.979                                                           |                  |
| Final R indices [I > 2σ(I)]       | R1 = 0.0445, wR2 = 0.1150                                       |                  |
| R indices (all data)              | R1 = 0.0605, wR2 = 0.1269                                       |                  |
| Absolute structure parameter      | 0.05(4)                                                         |                  |
| Extinction coefficient            | n/a                                                             |                  |
| Largest diff. peak and hole       | 0.512 and -0.196 e.Å <sup>-3</sup>                              |                  |

## 2. Copies of $^1\text{H}$ and $^{13}\text{C}$ NMR spectrum of compounds 4 and 6

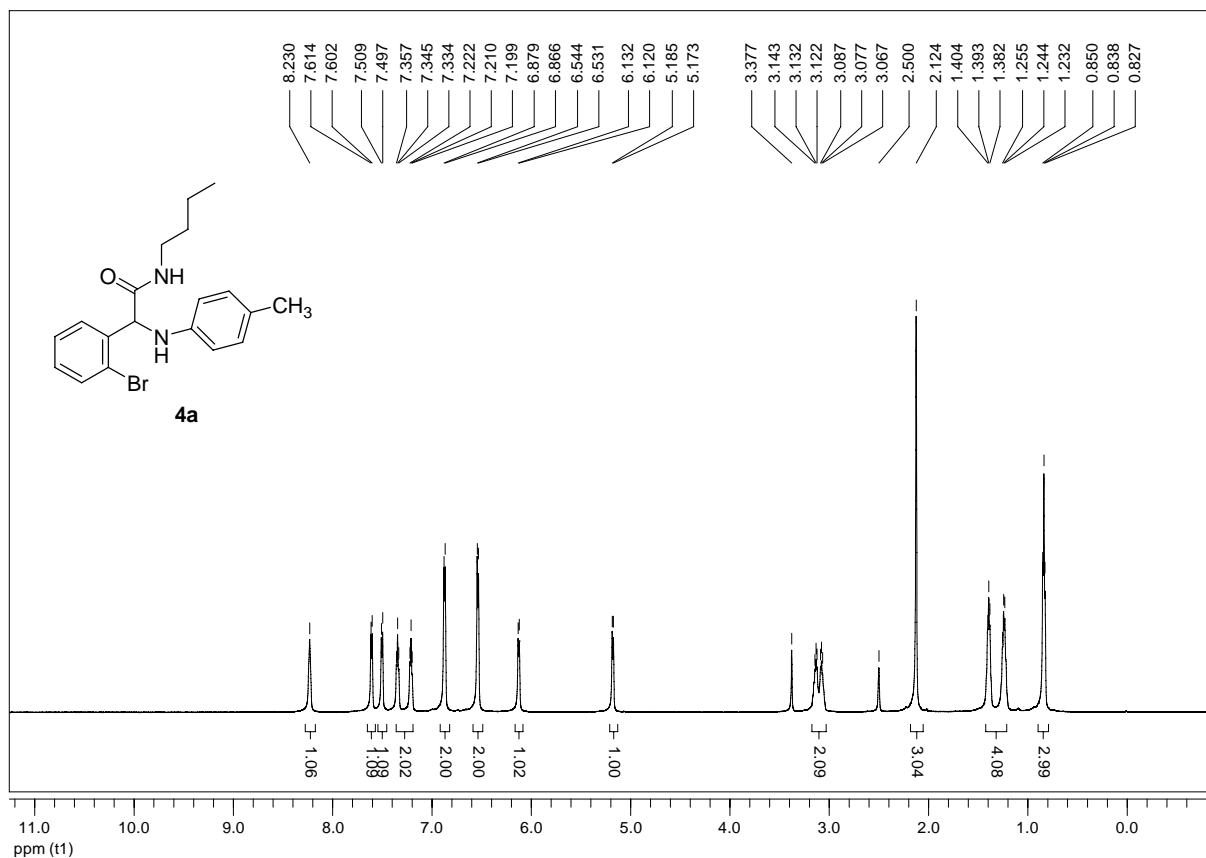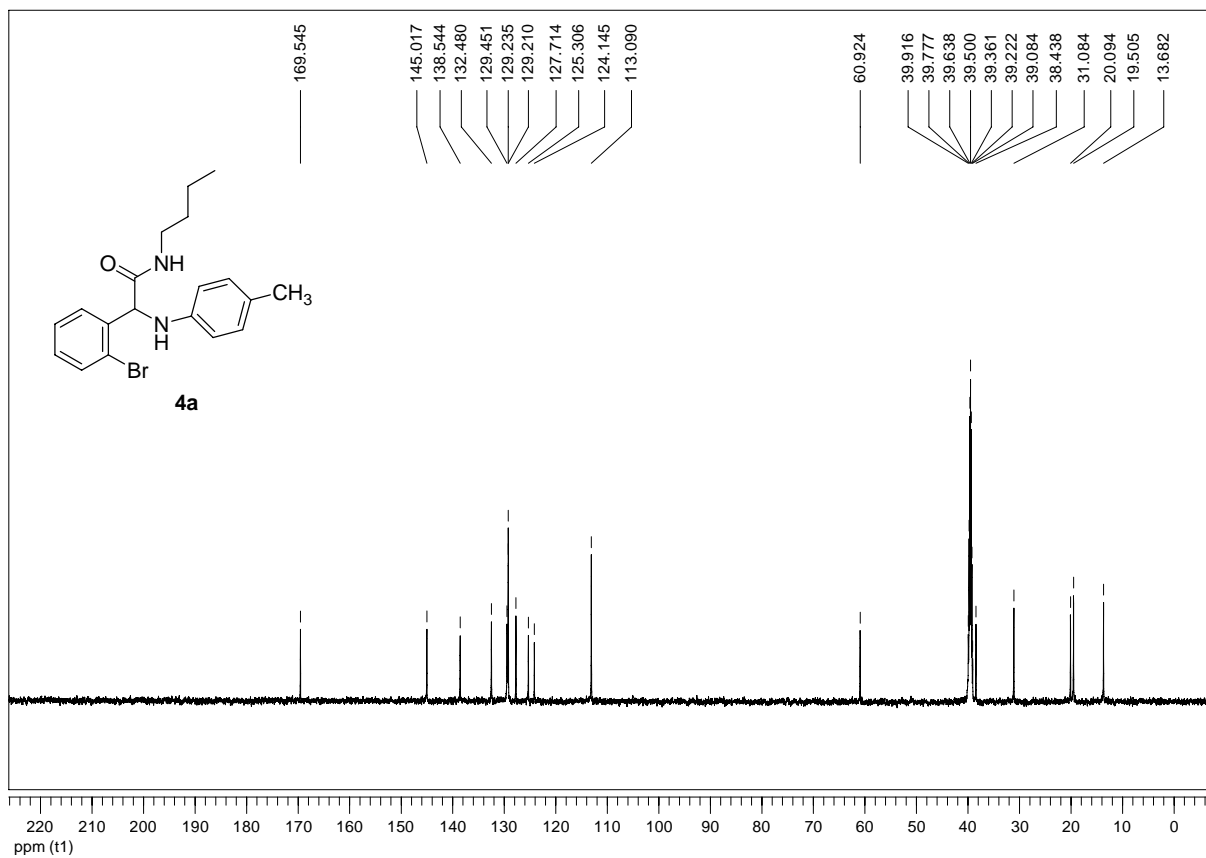

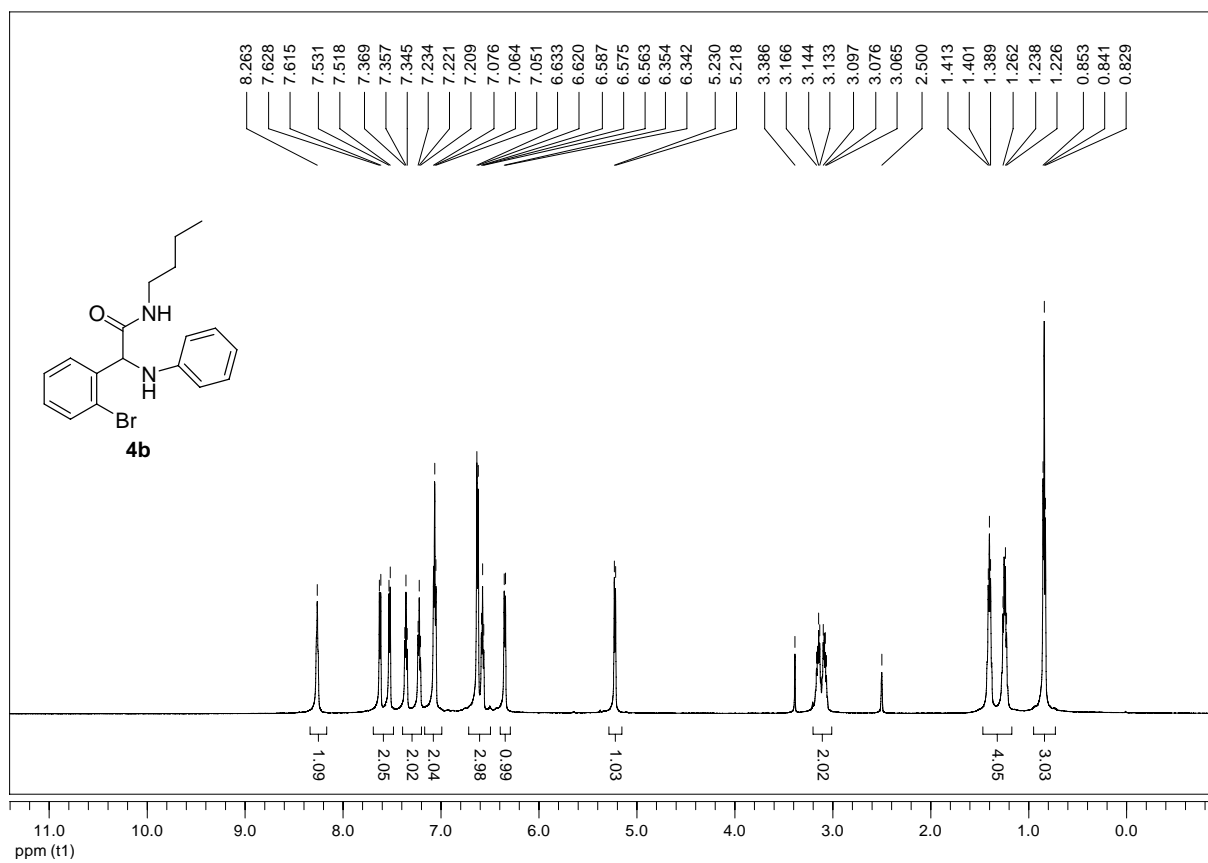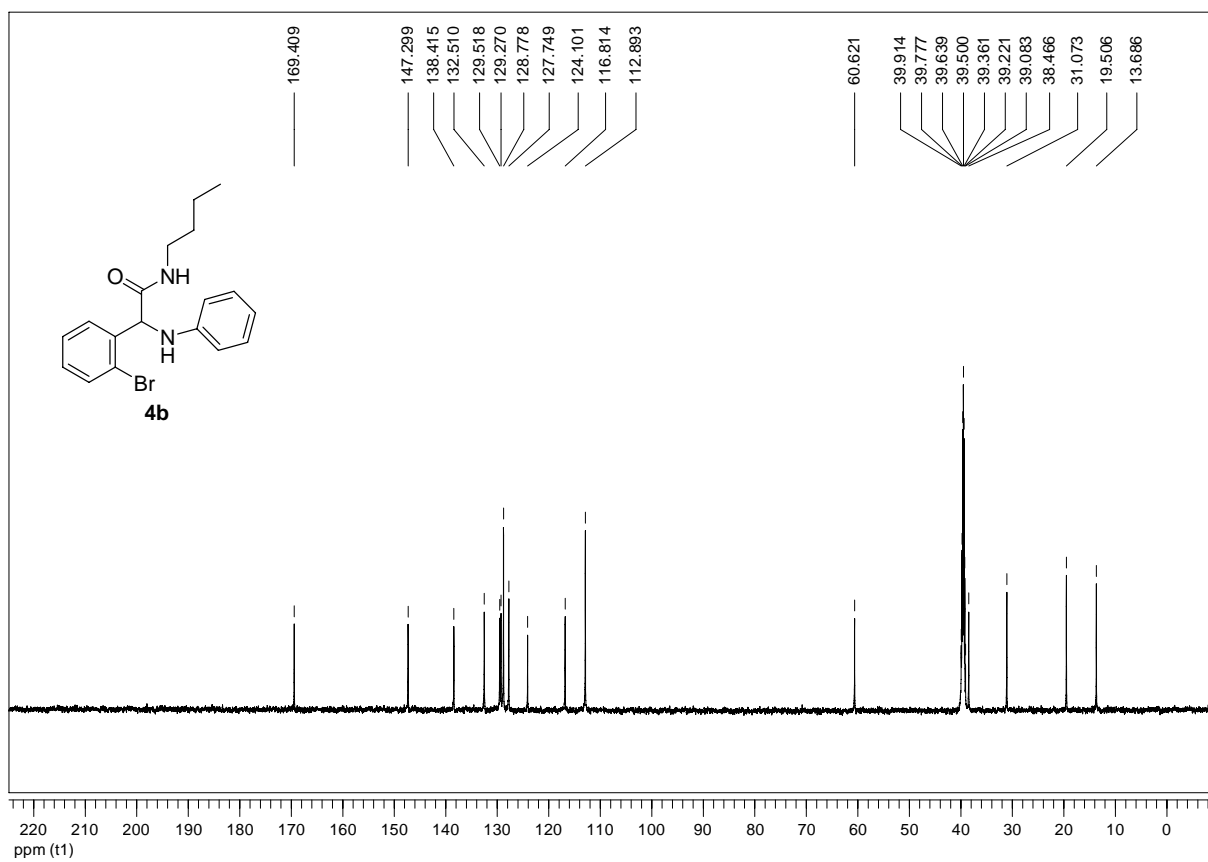

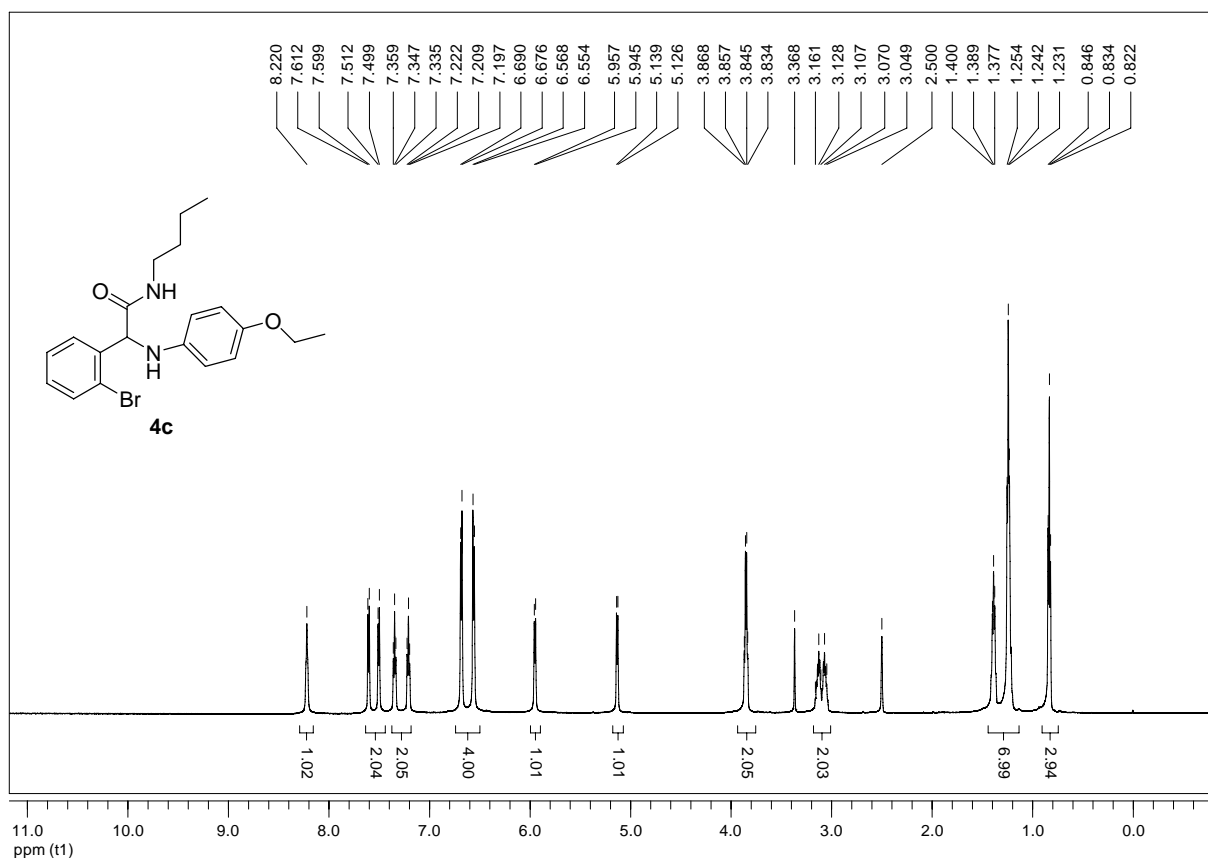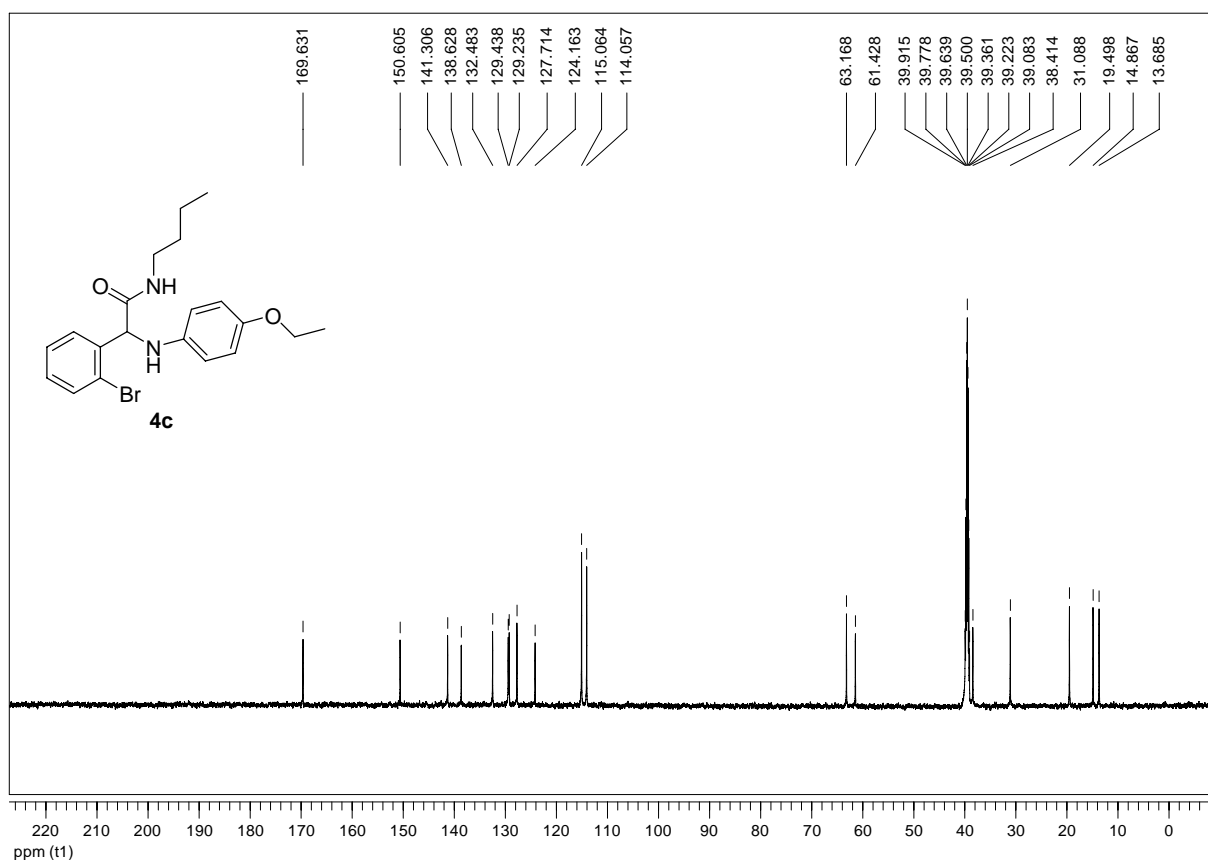

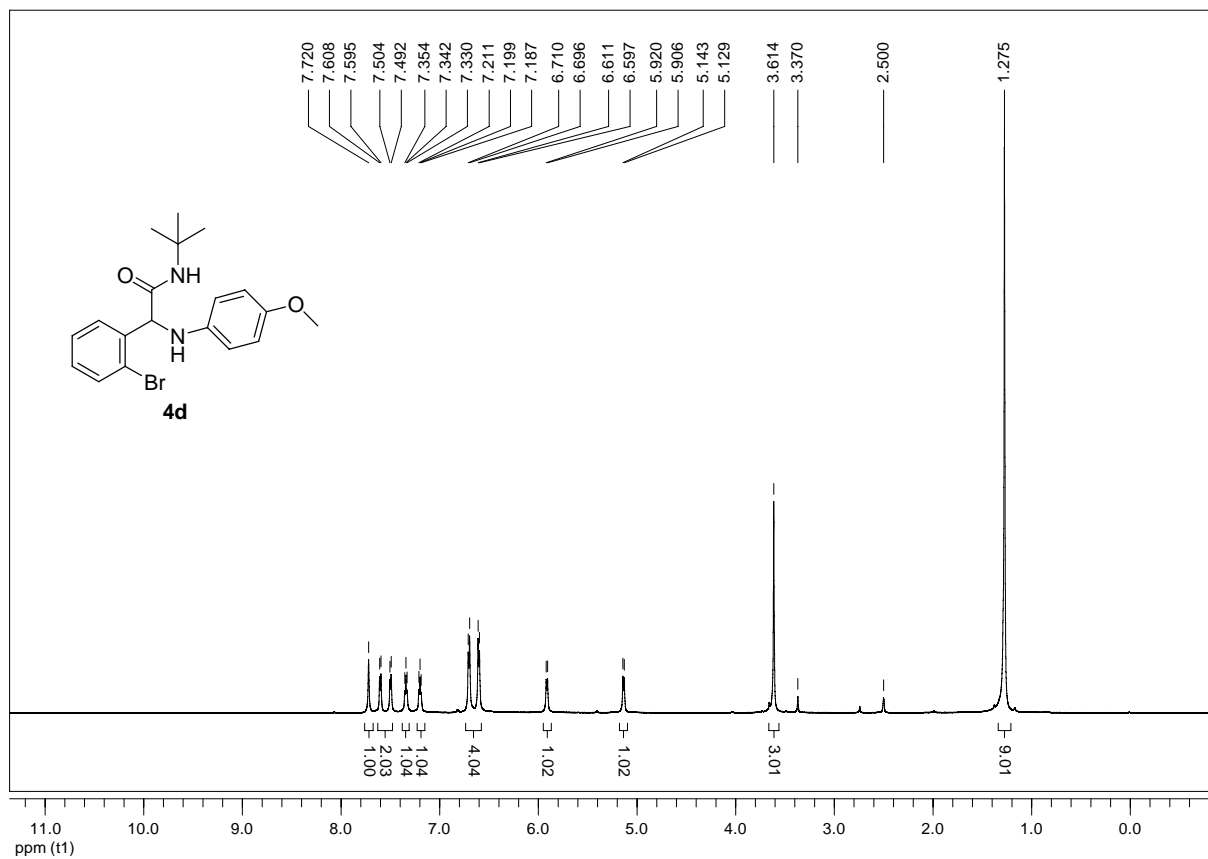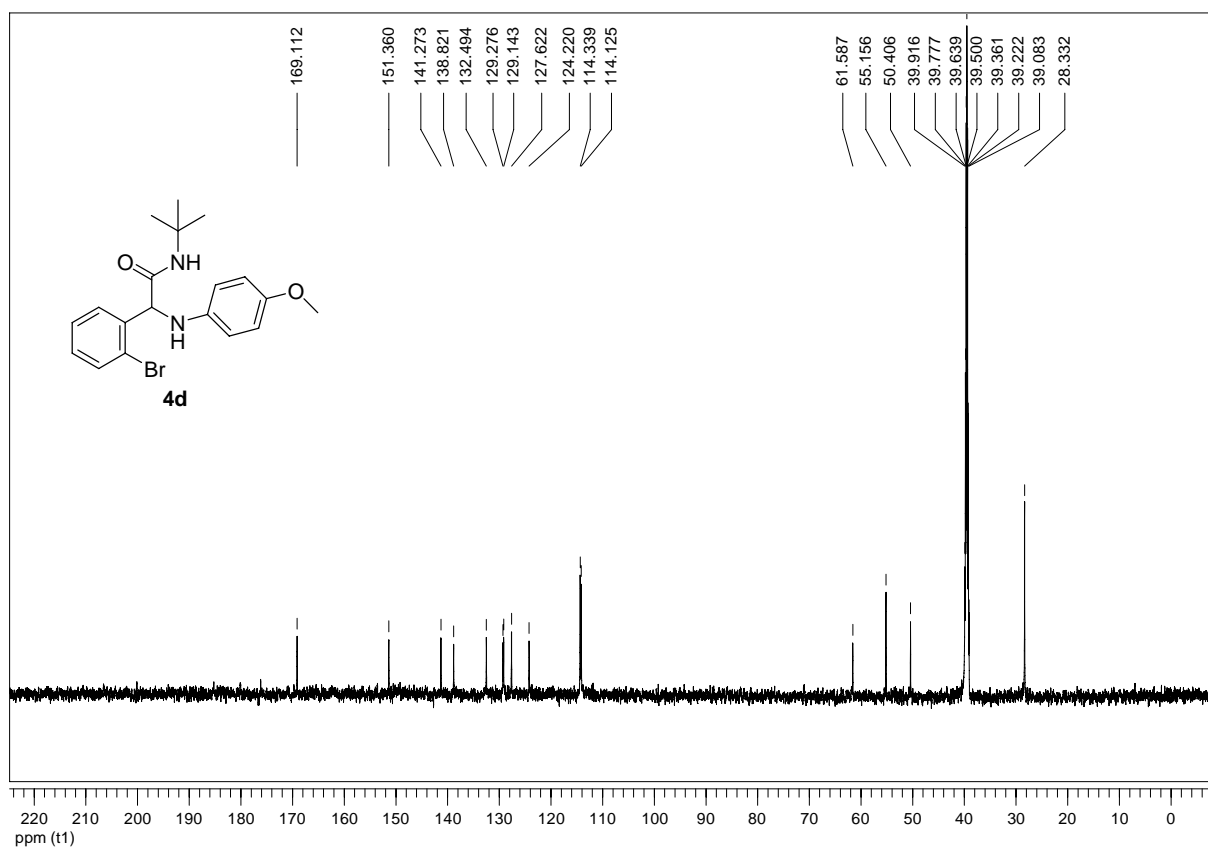

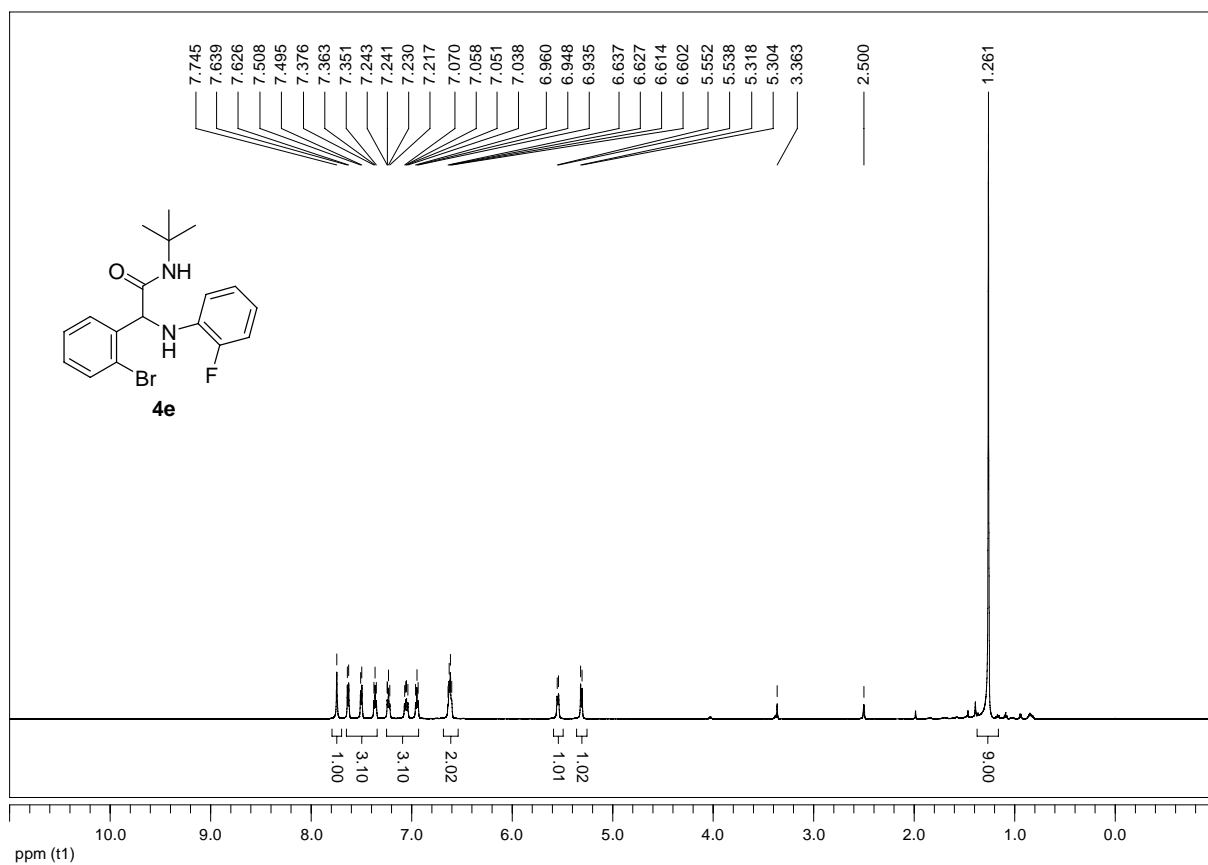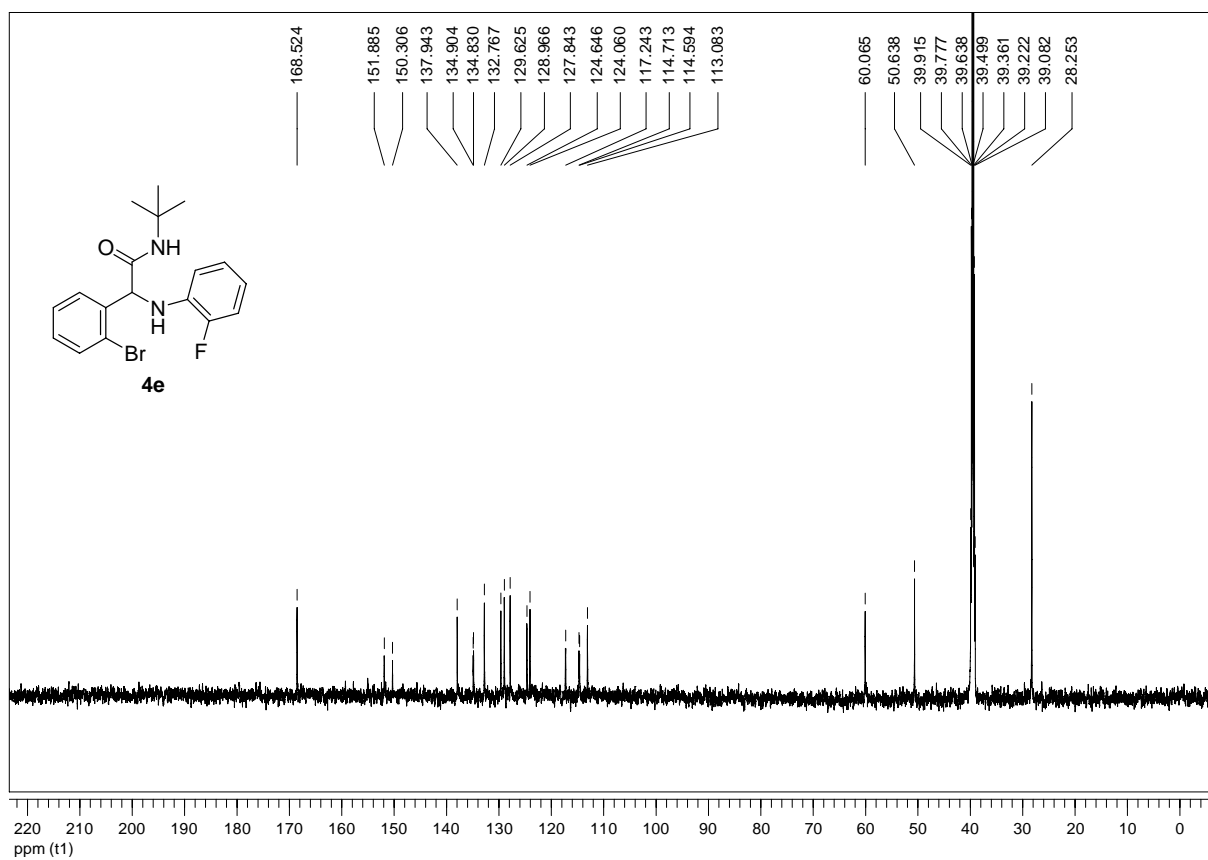

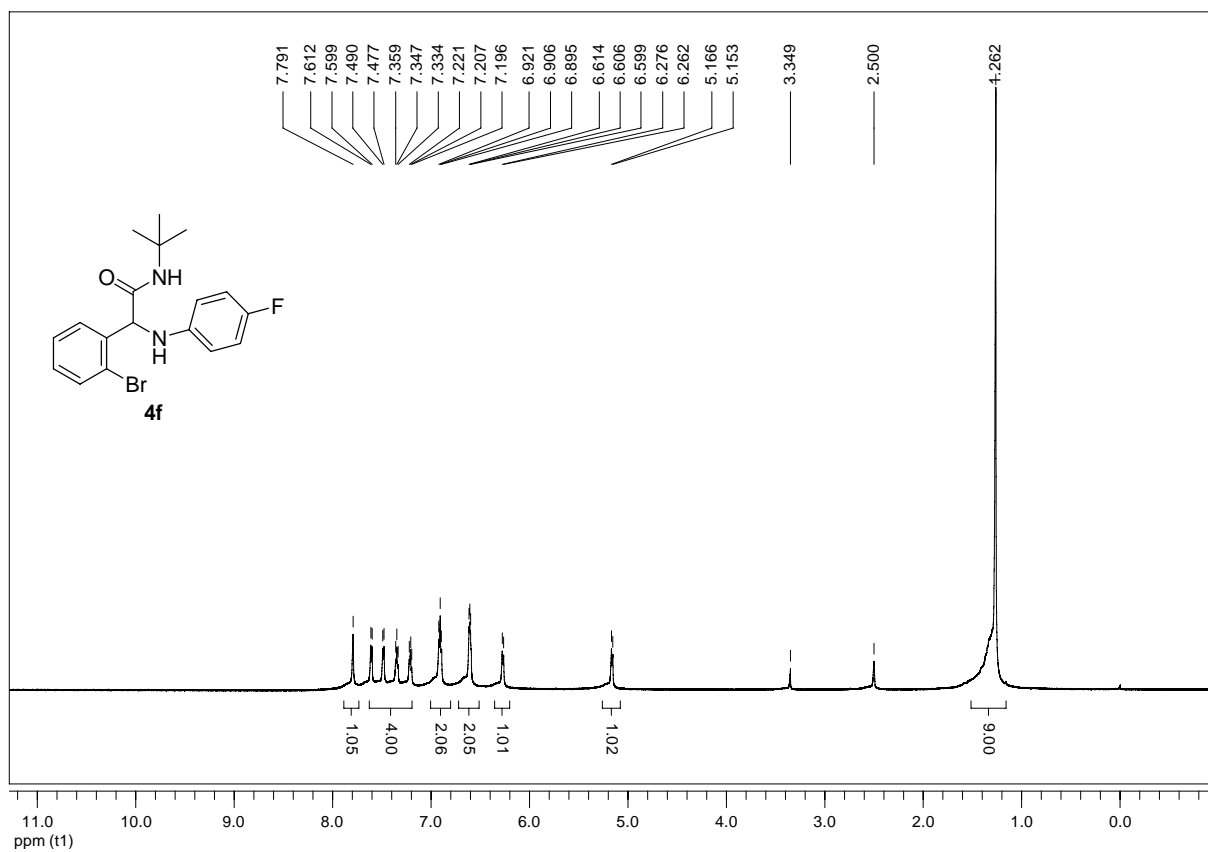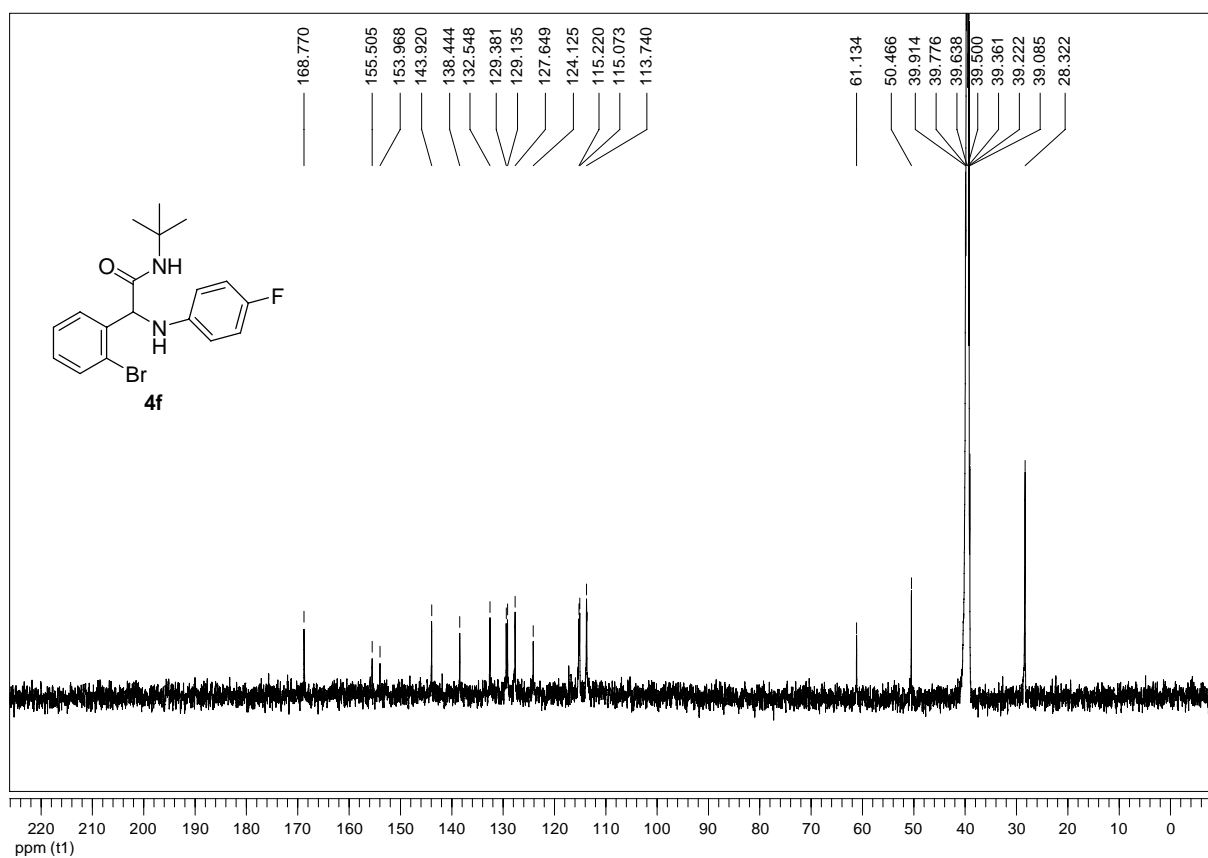



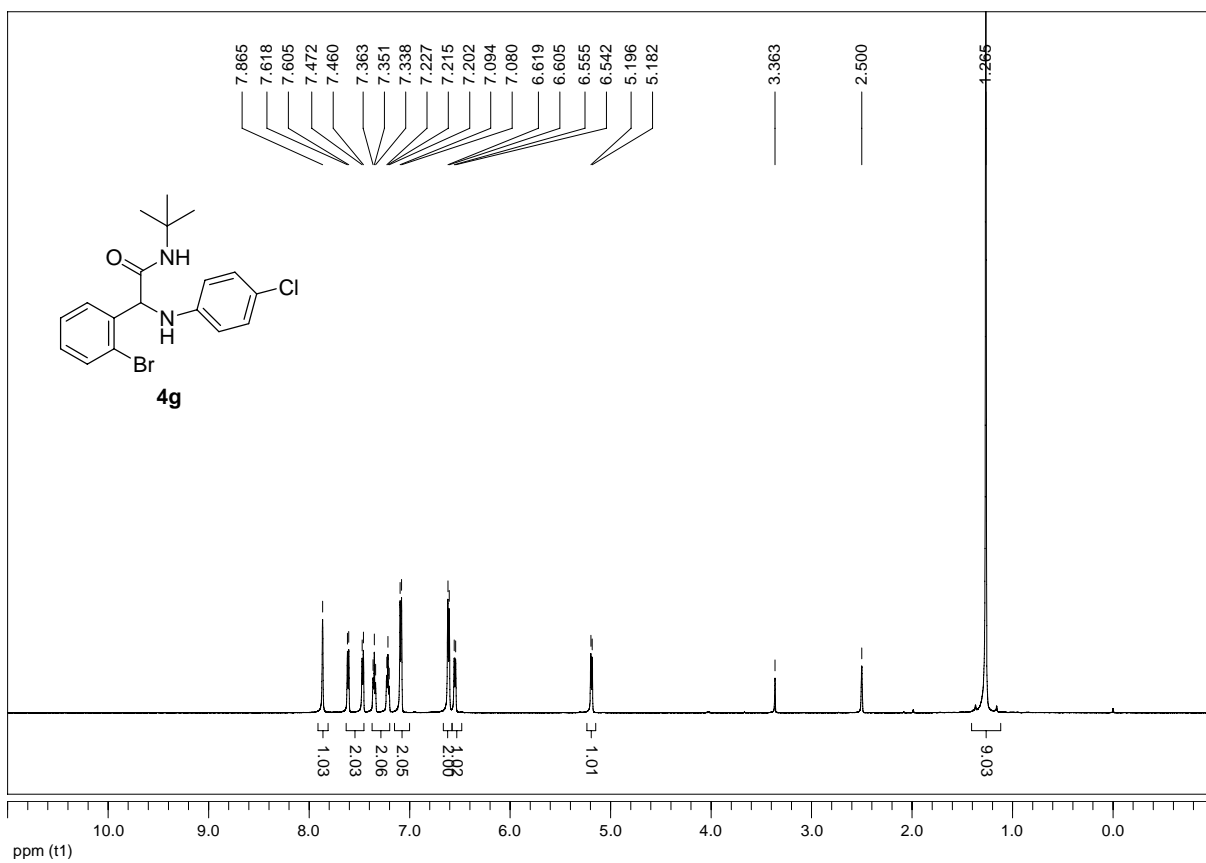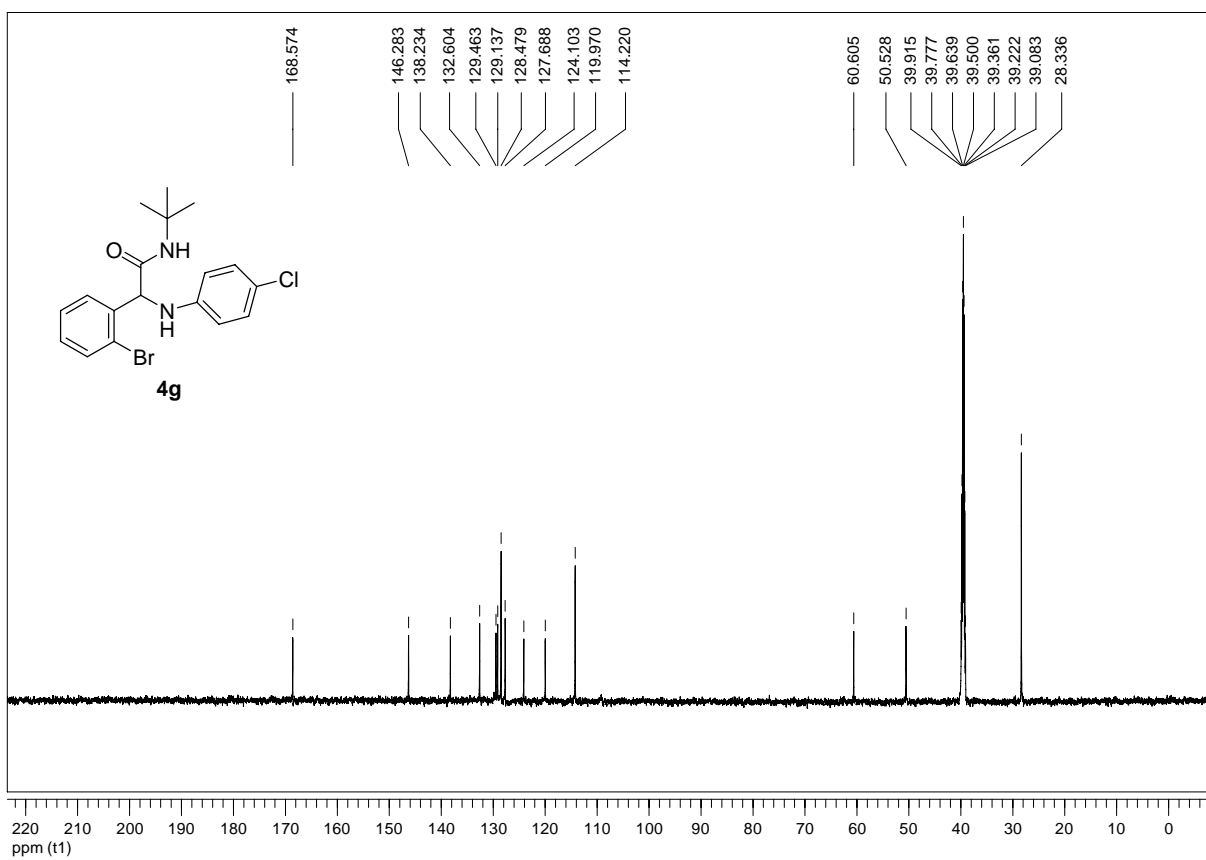

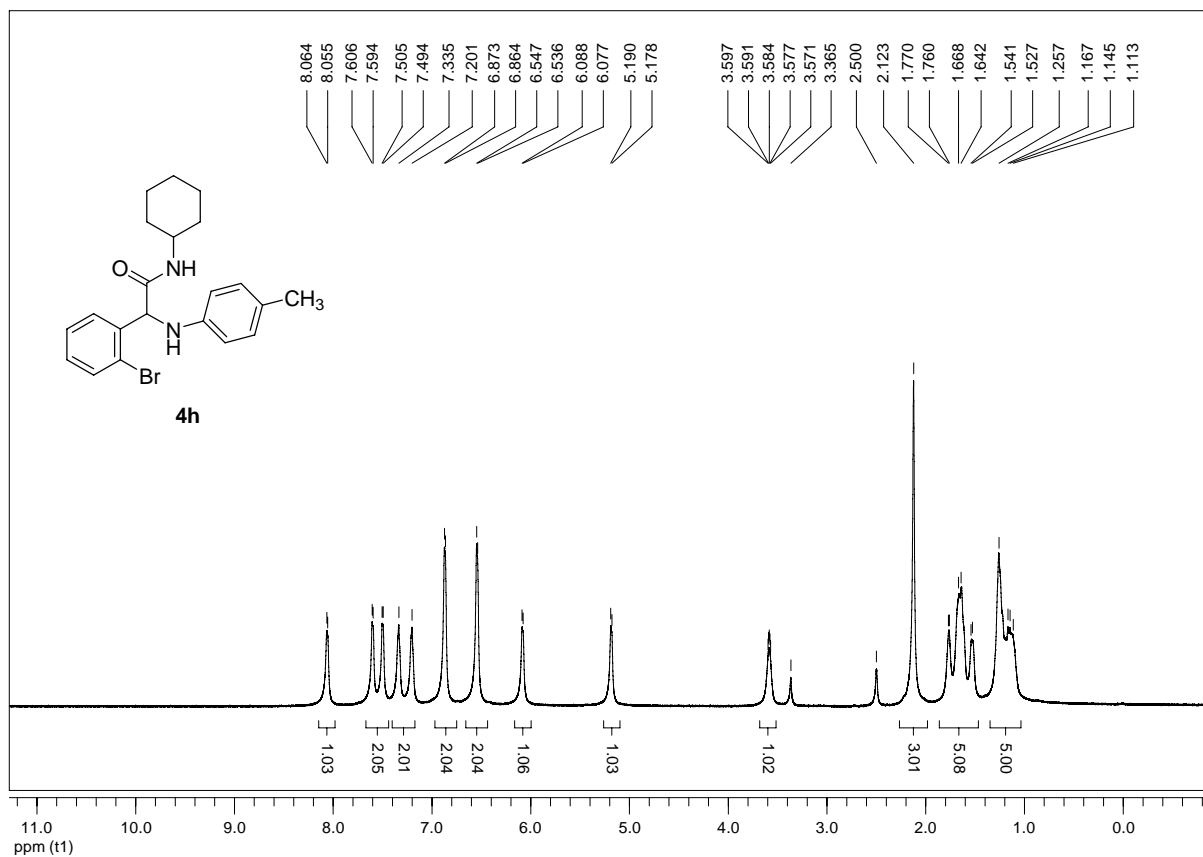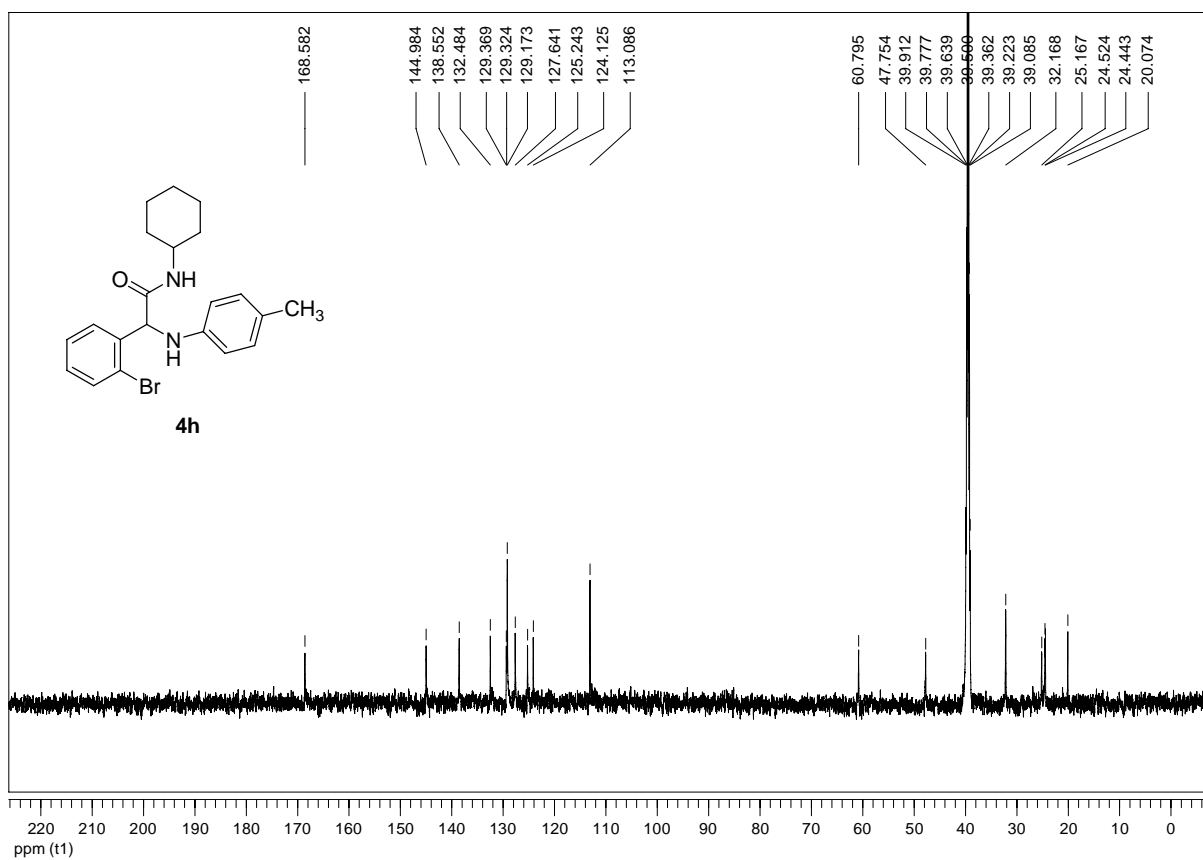

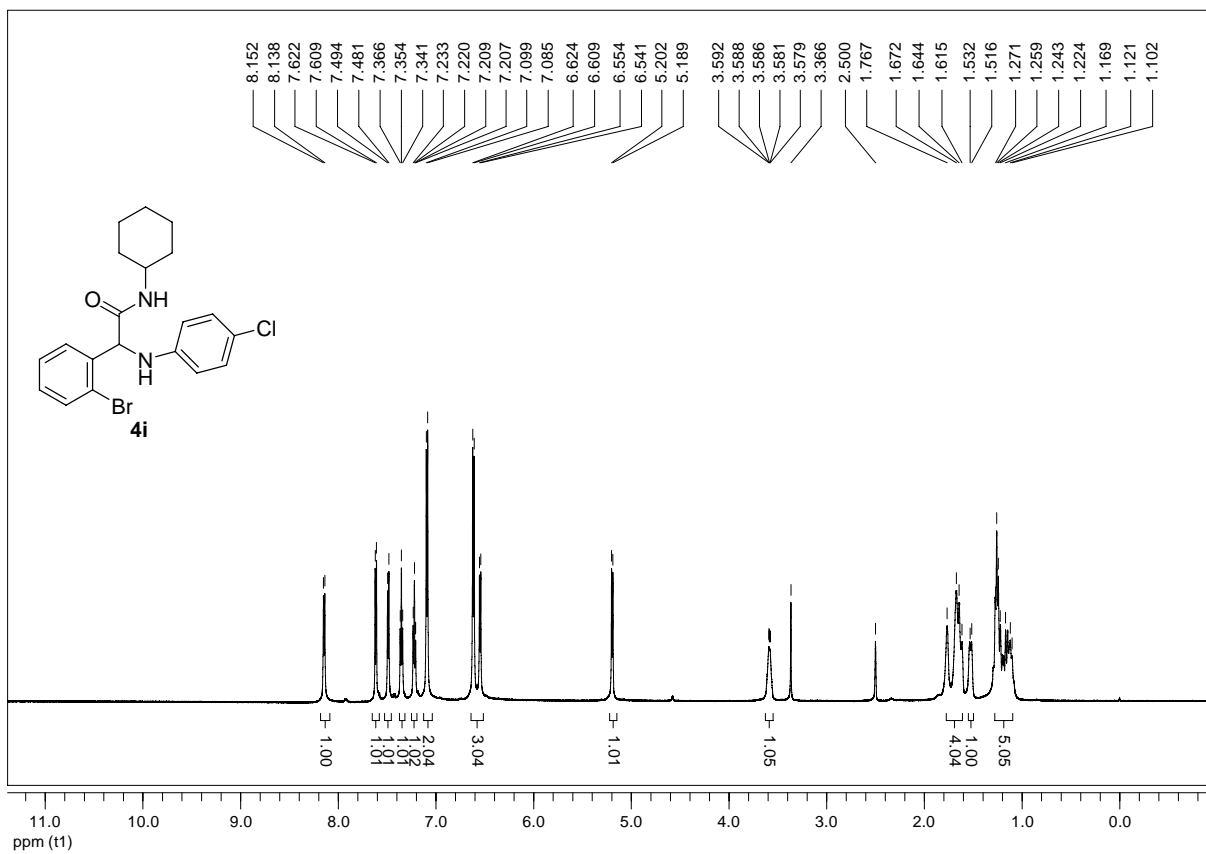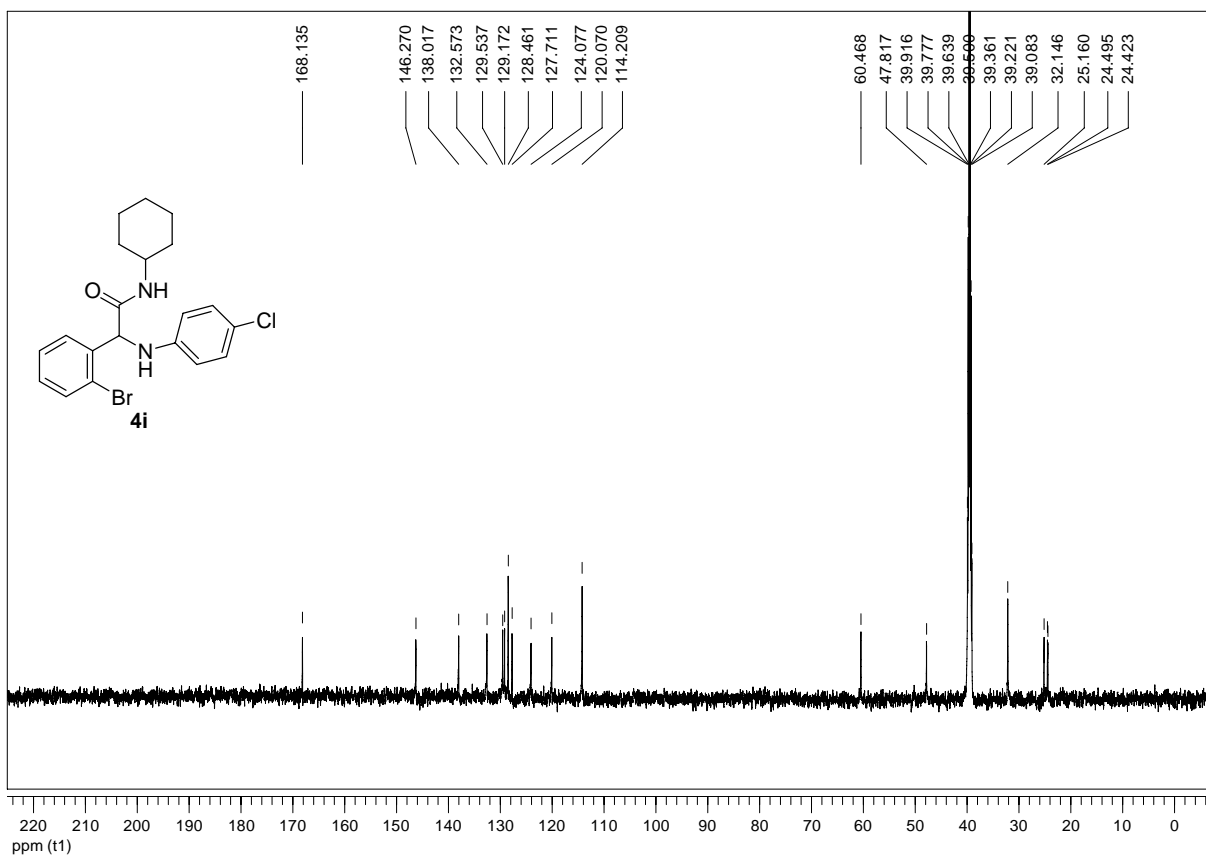

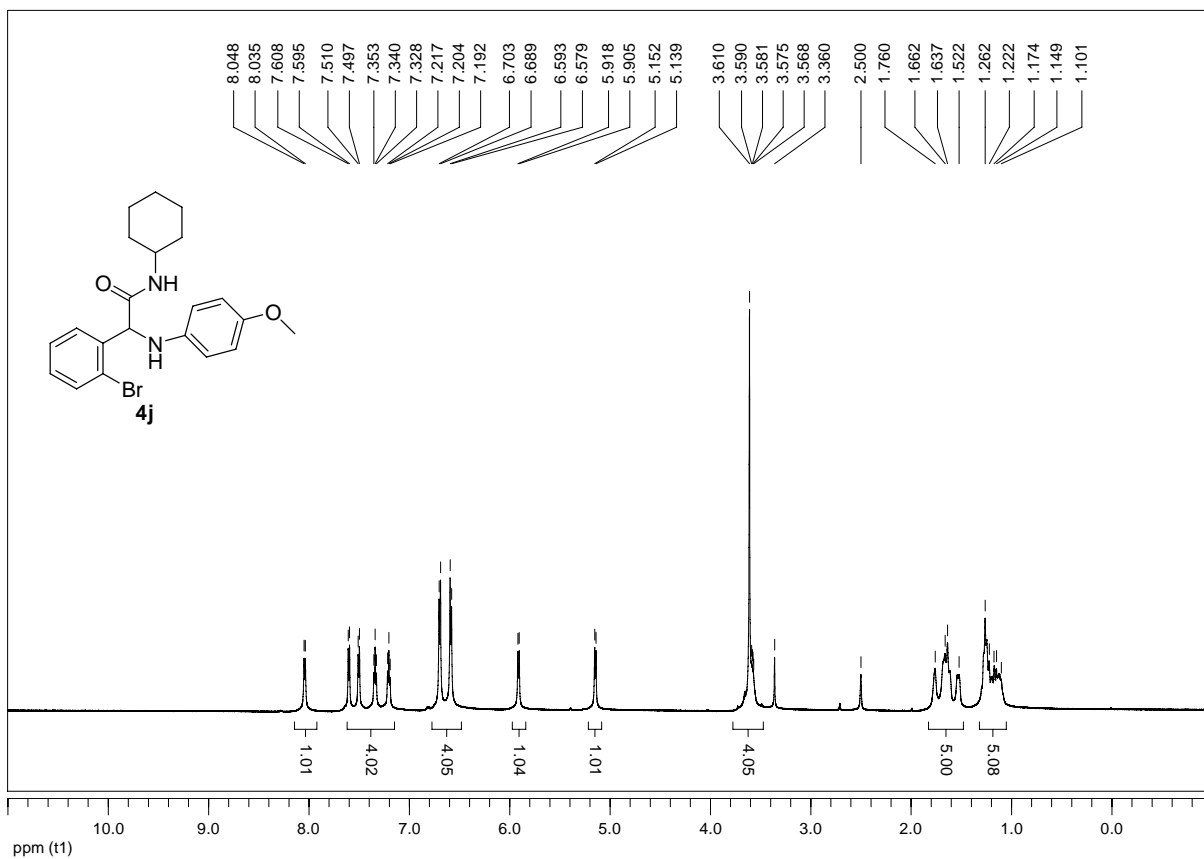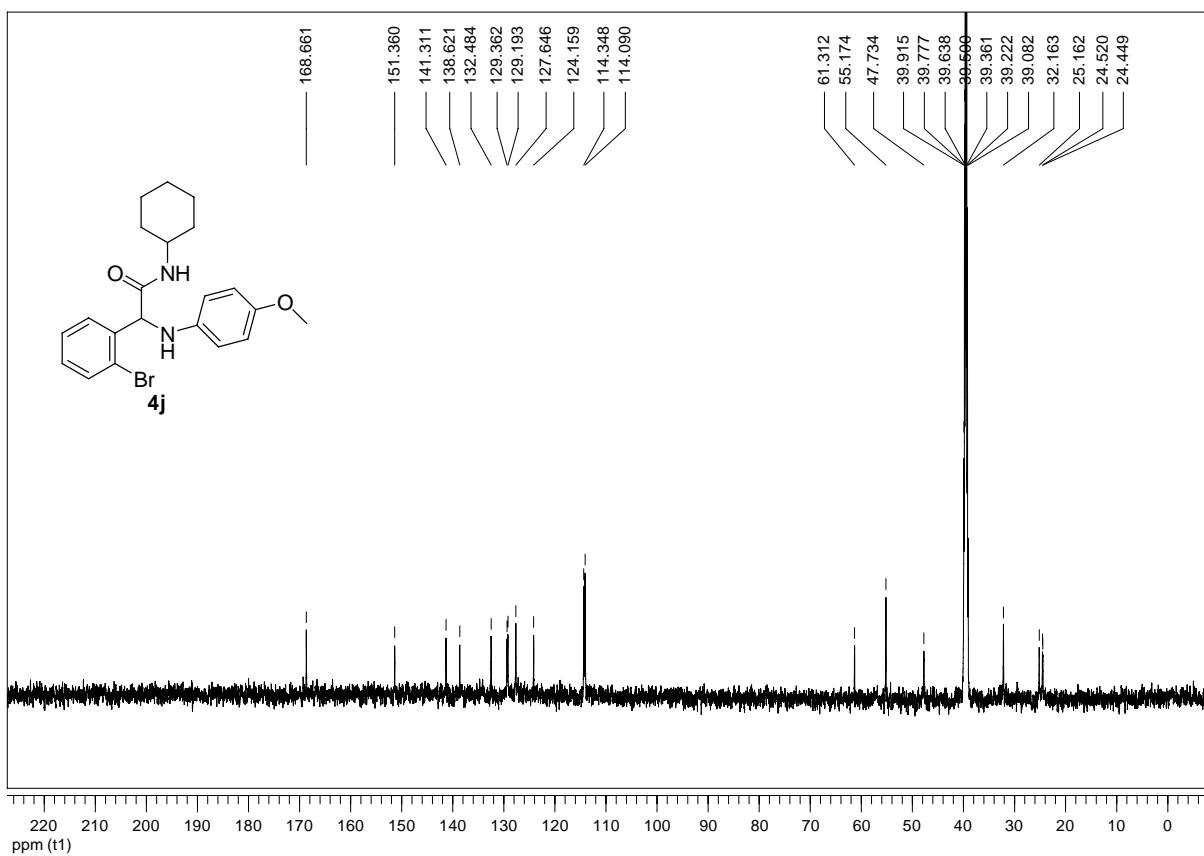

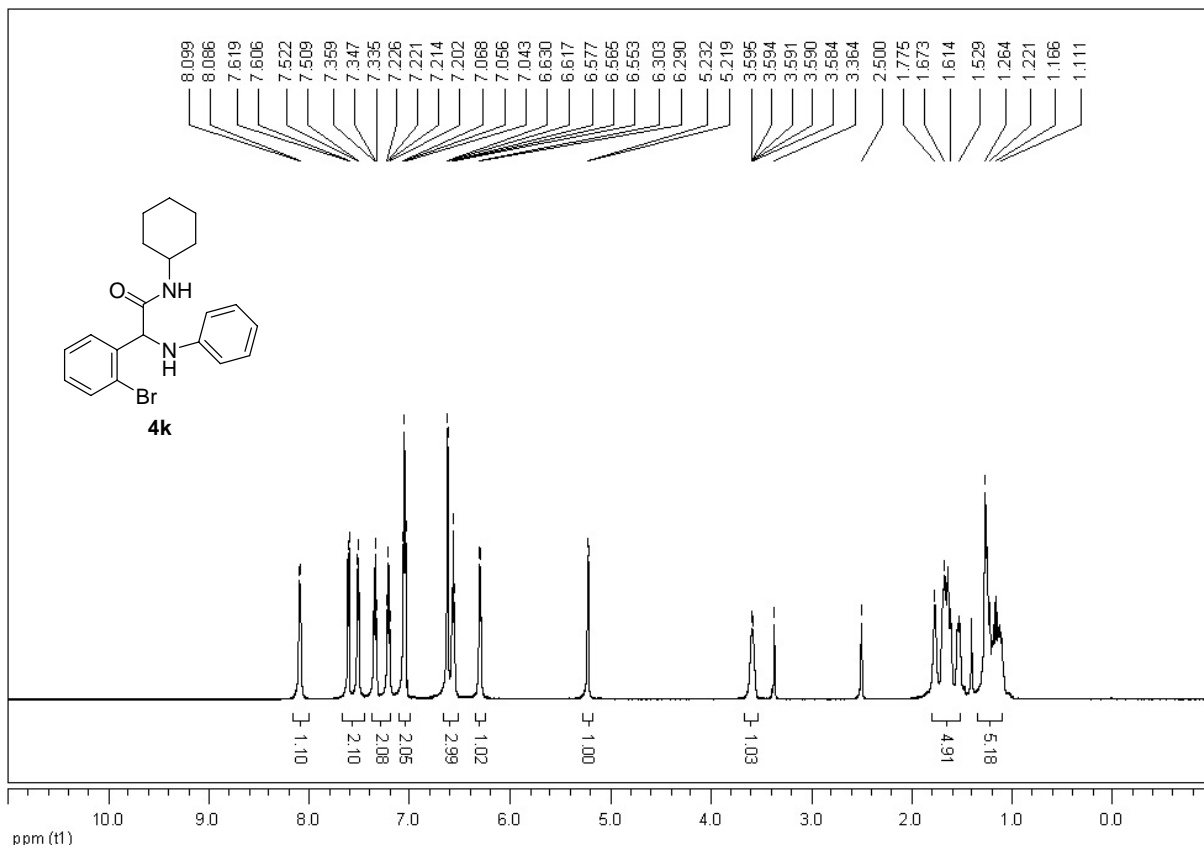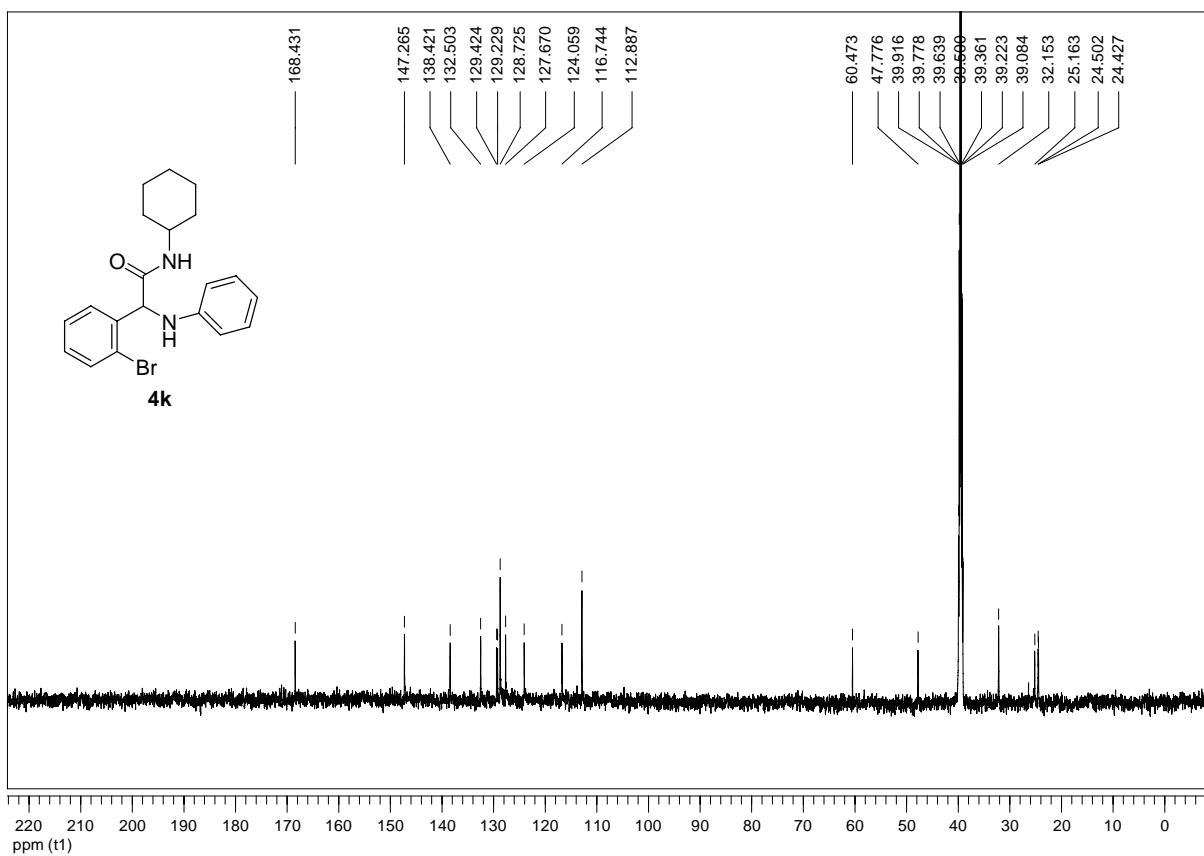

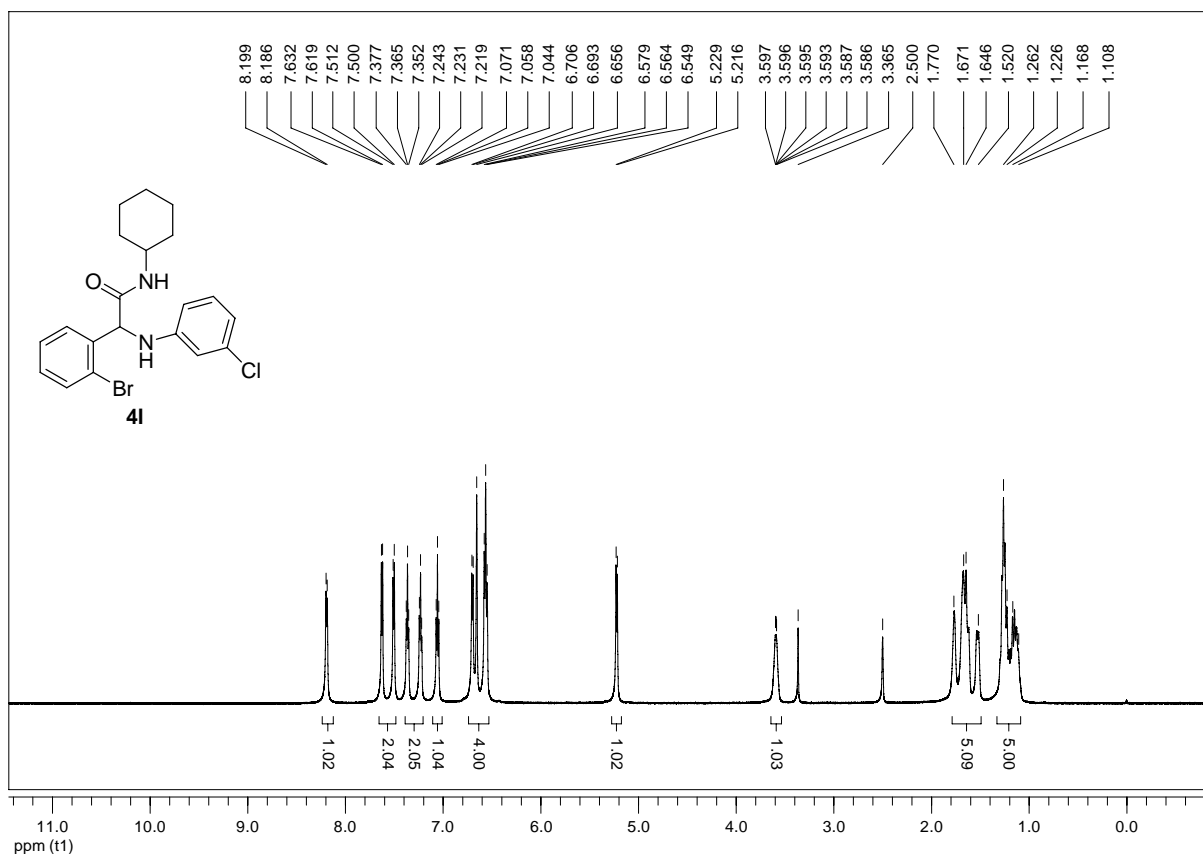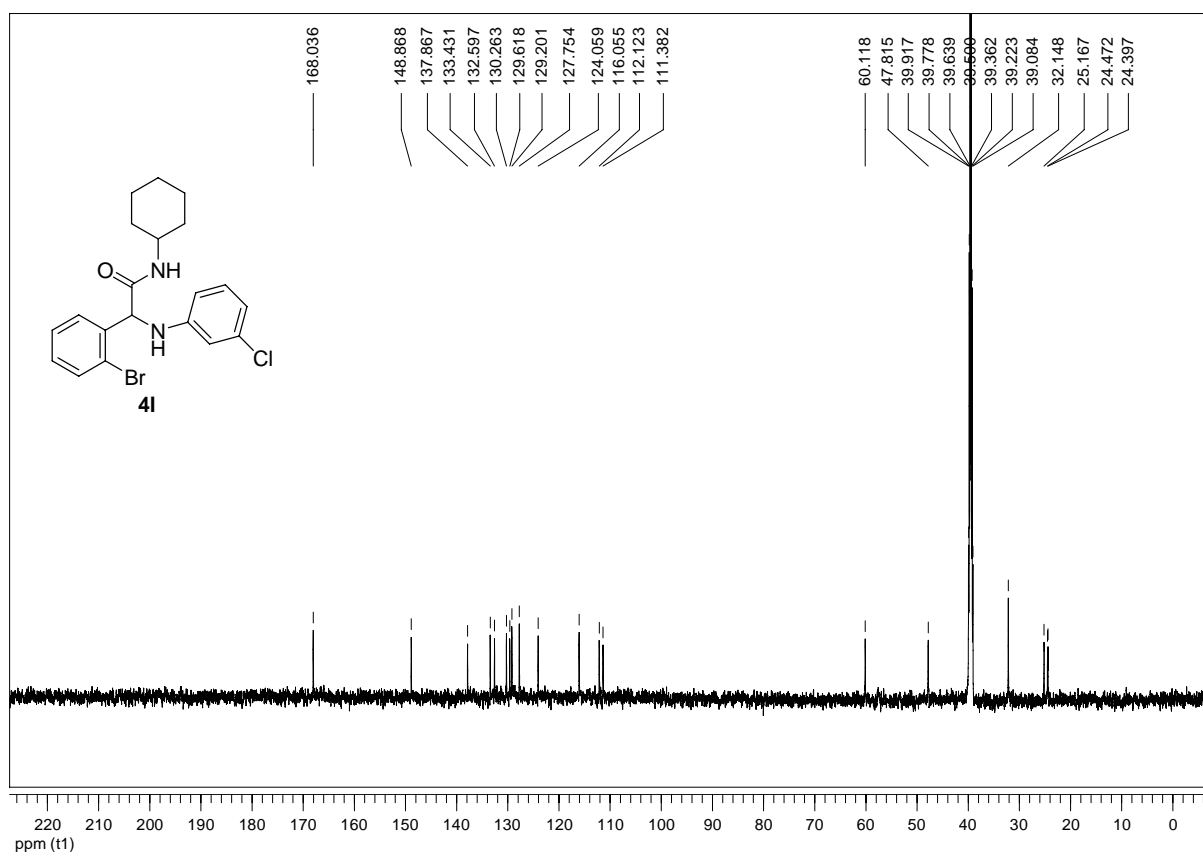

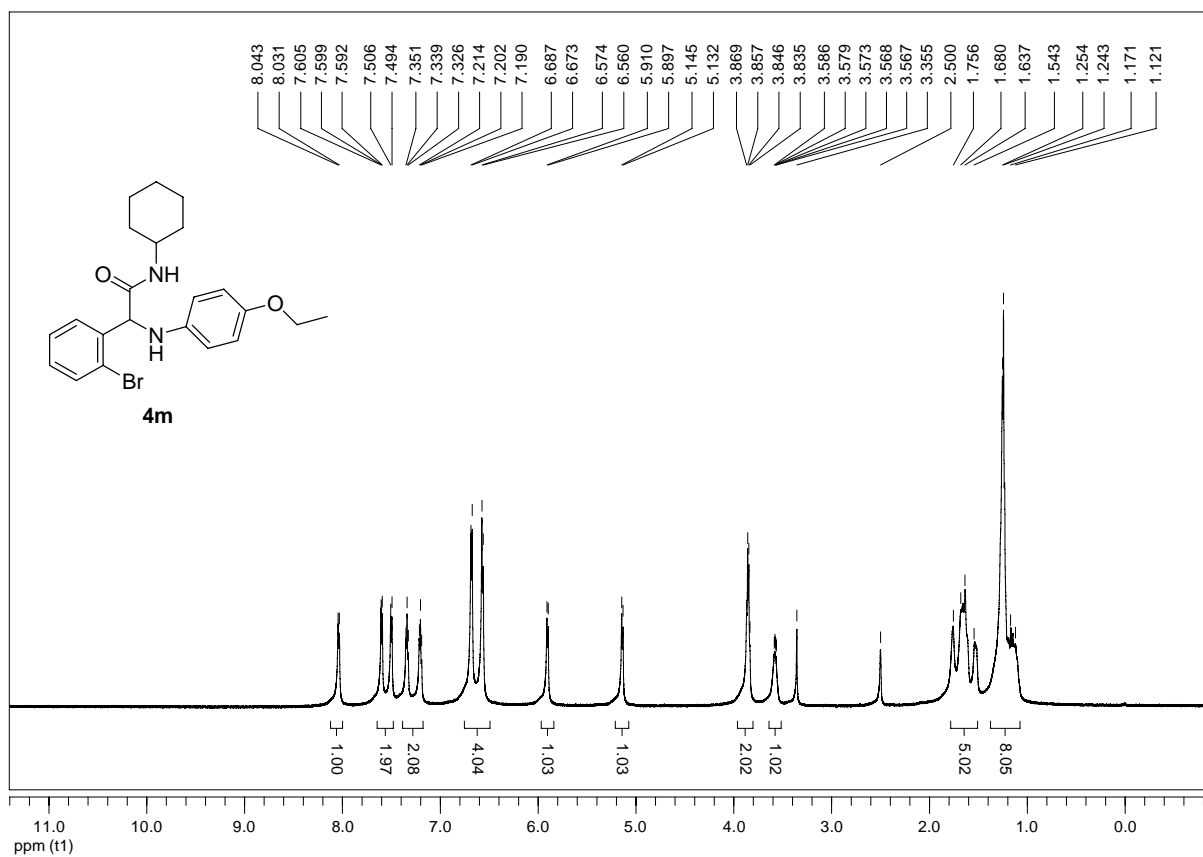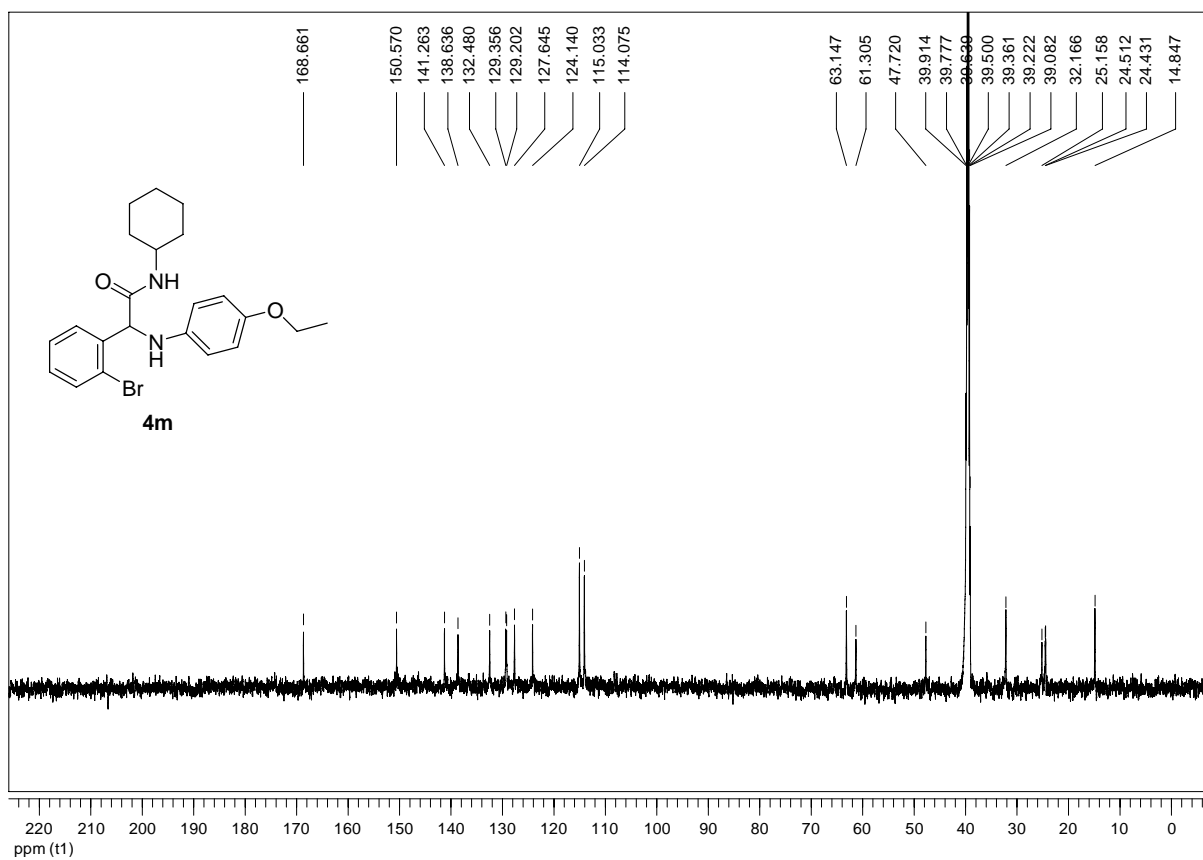

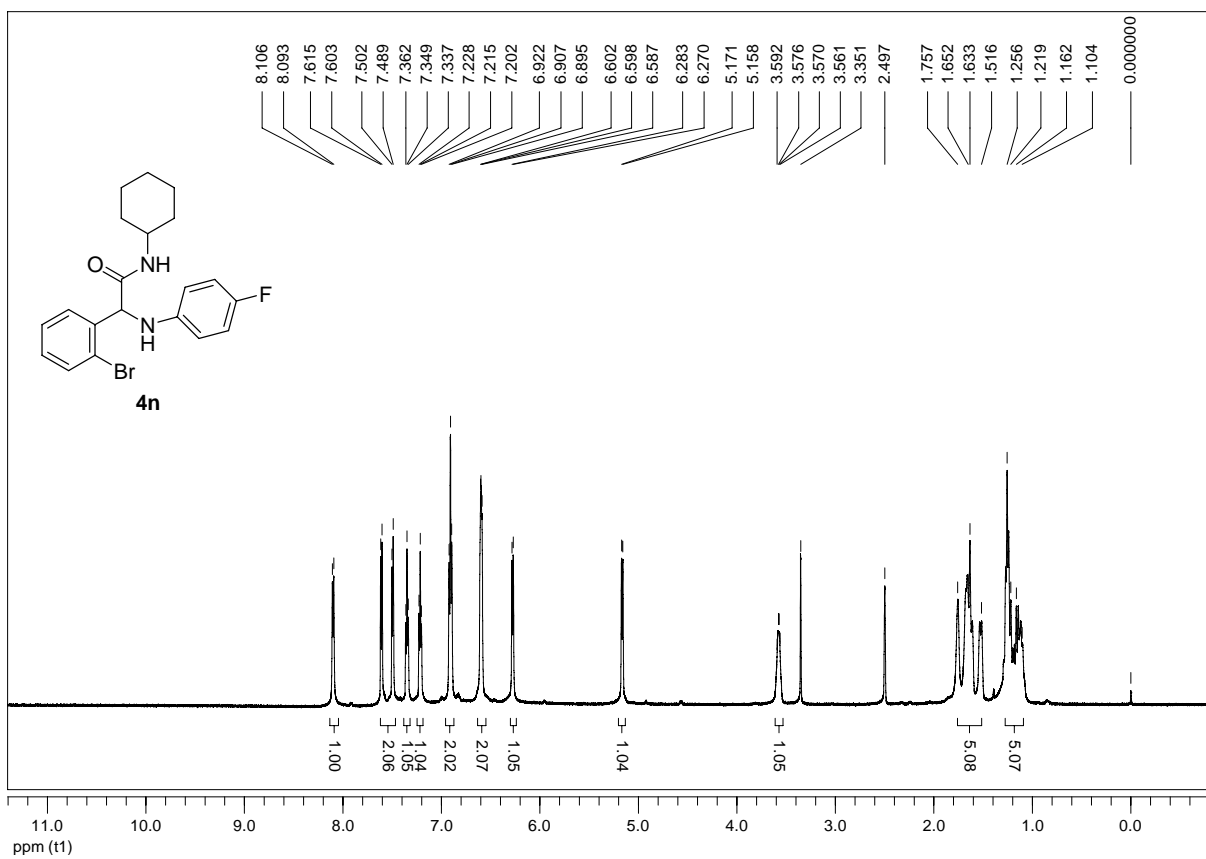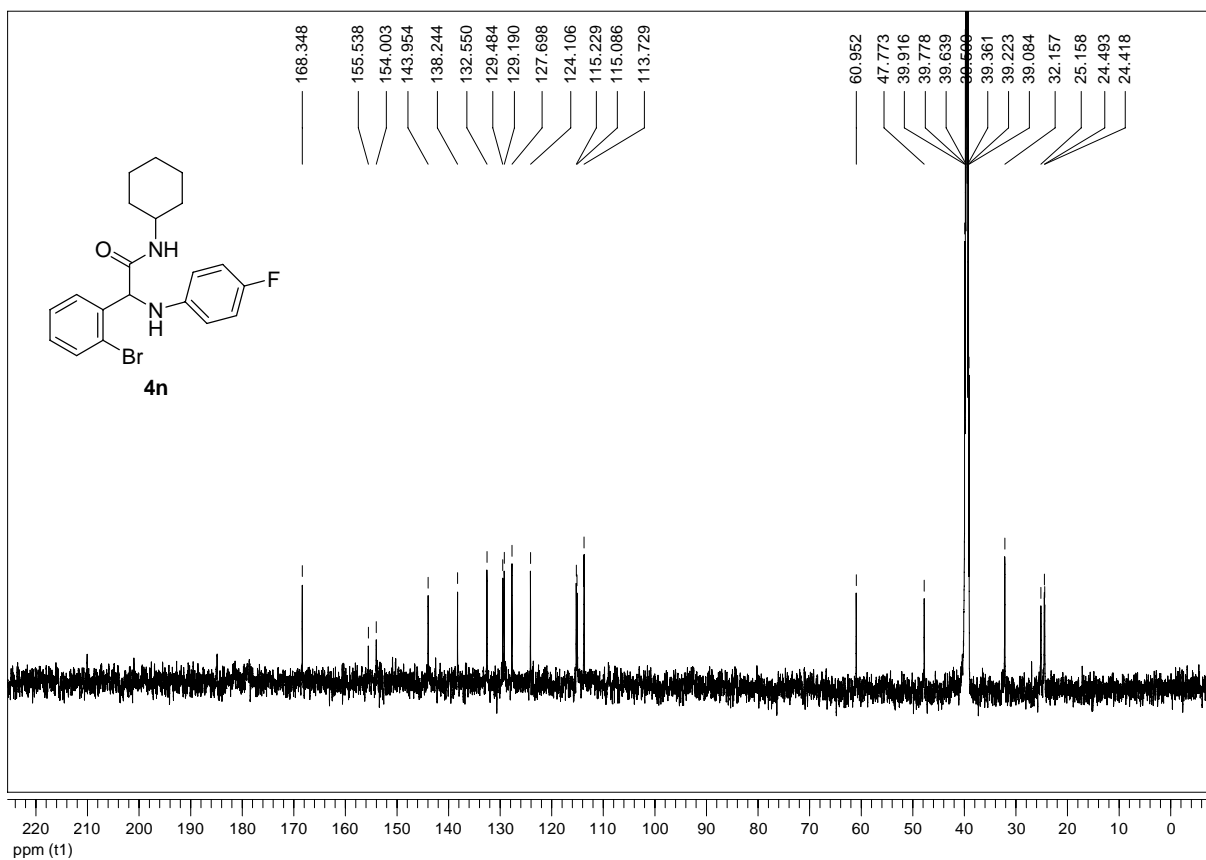



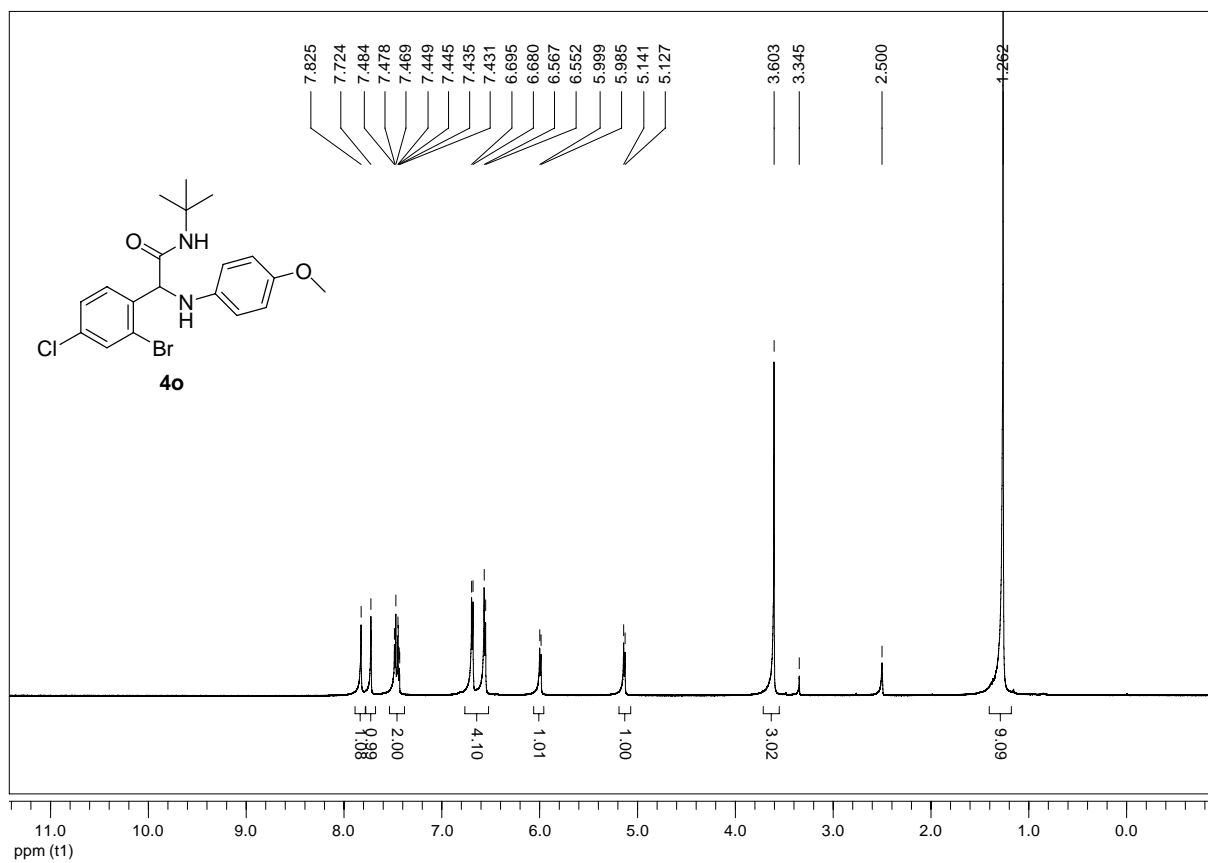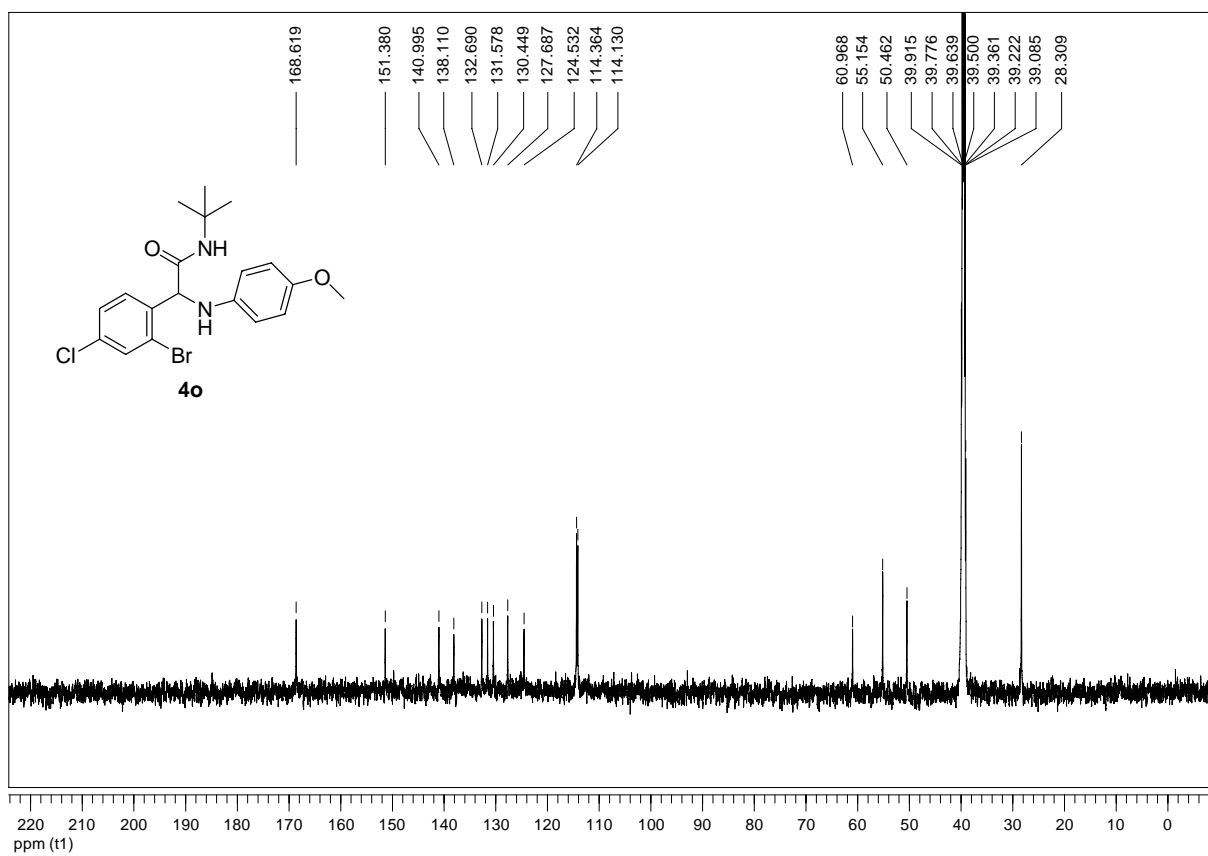

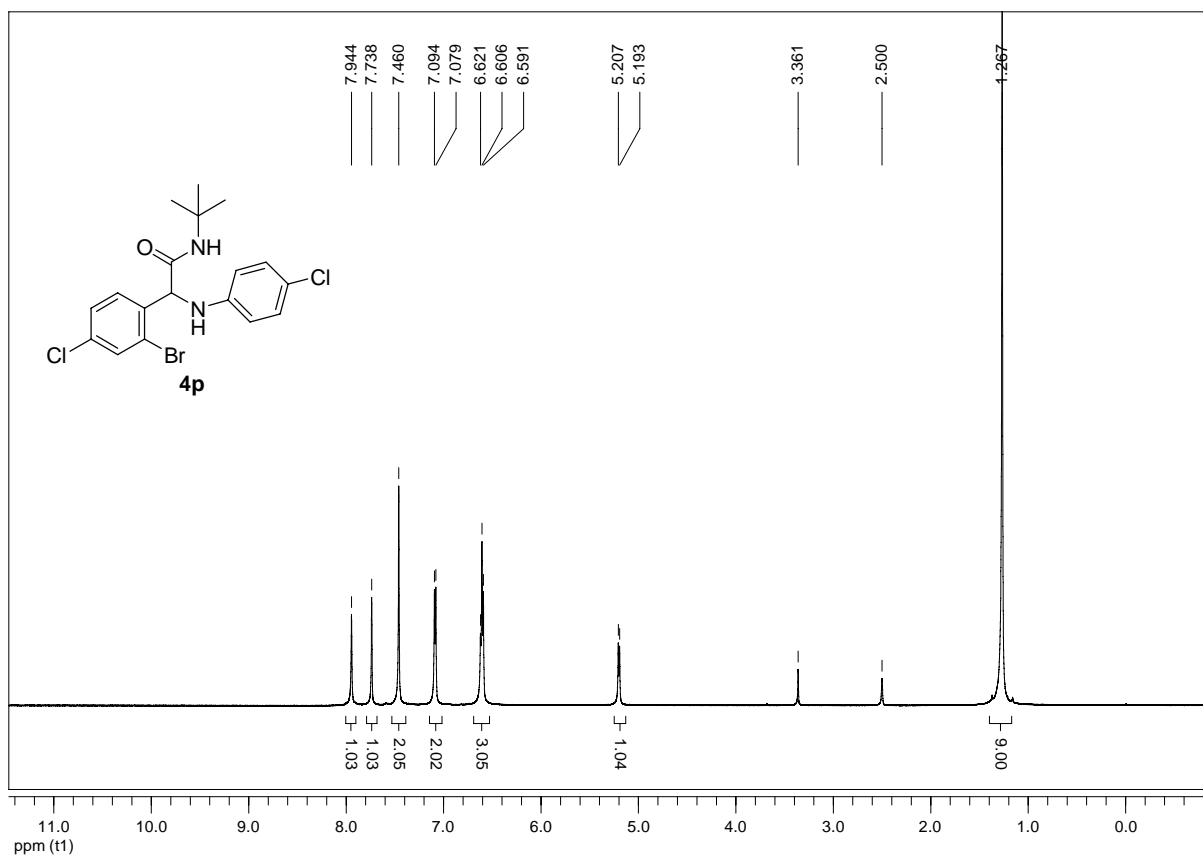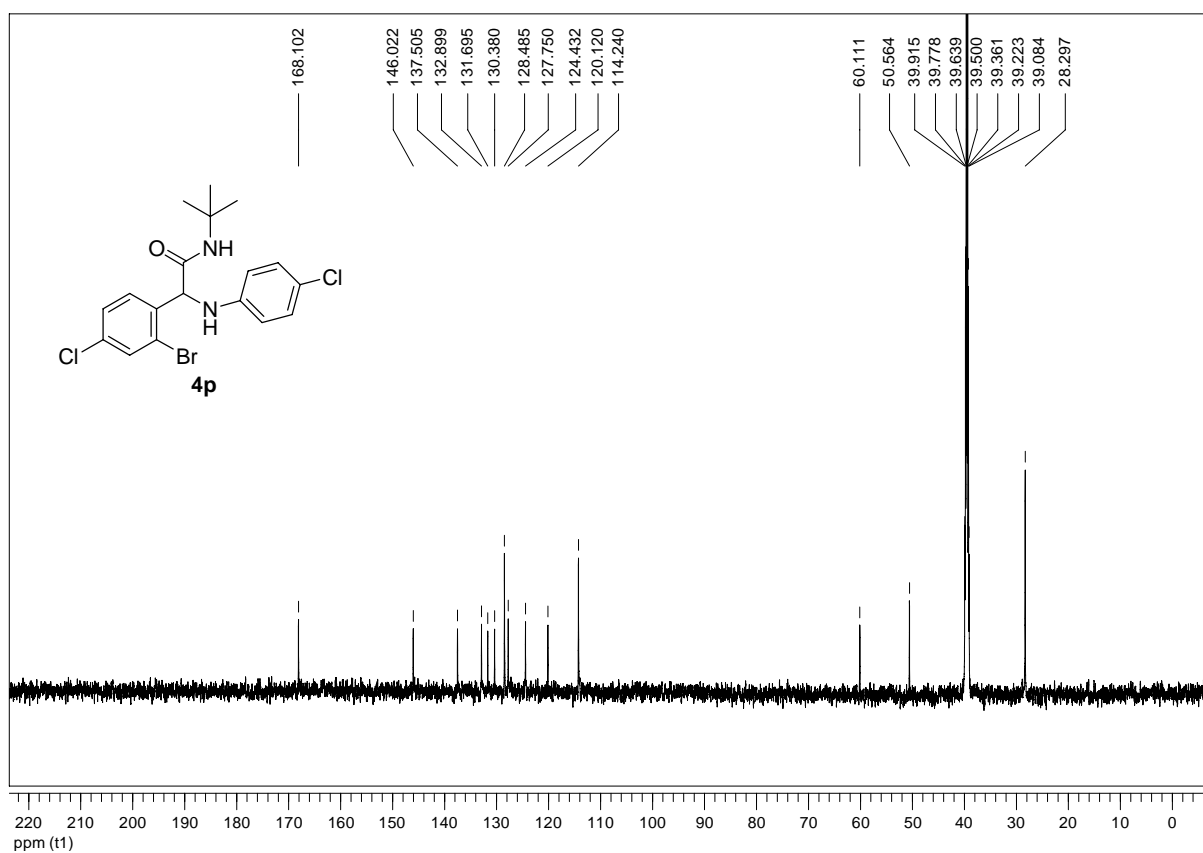

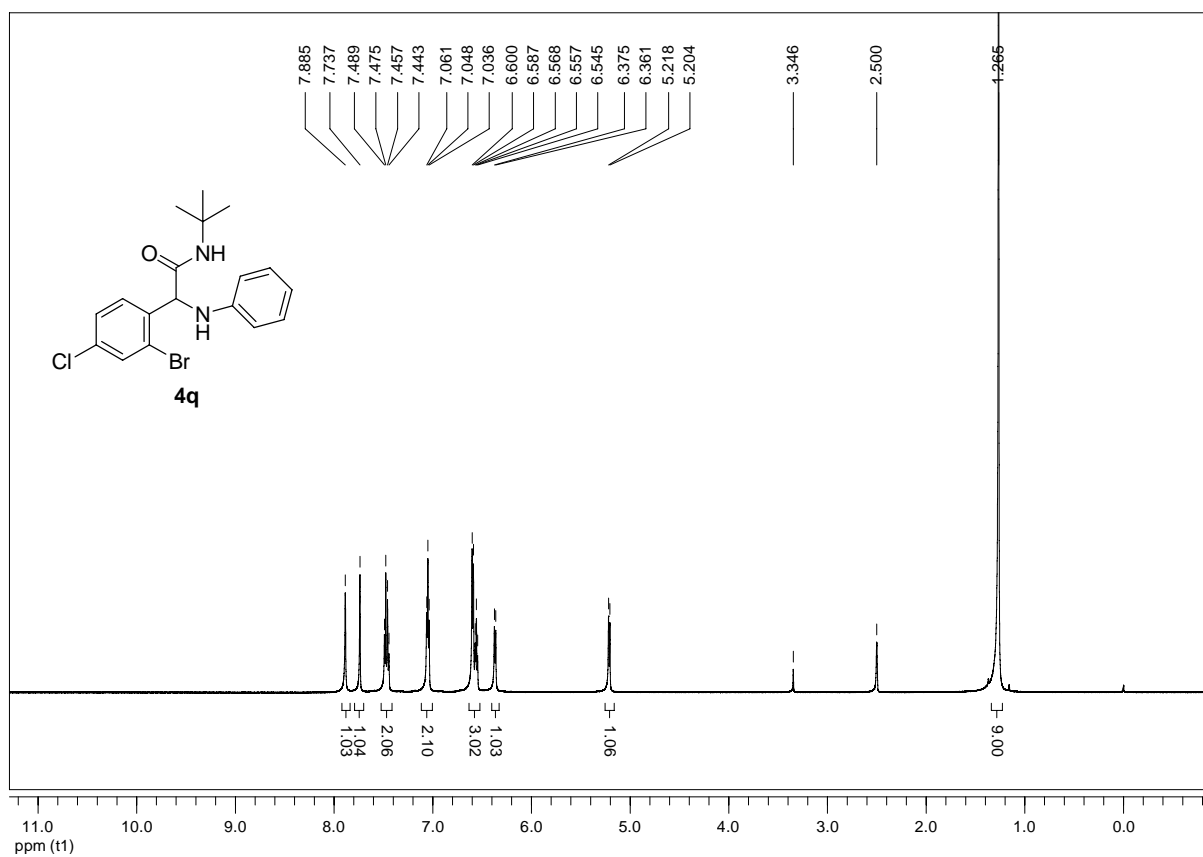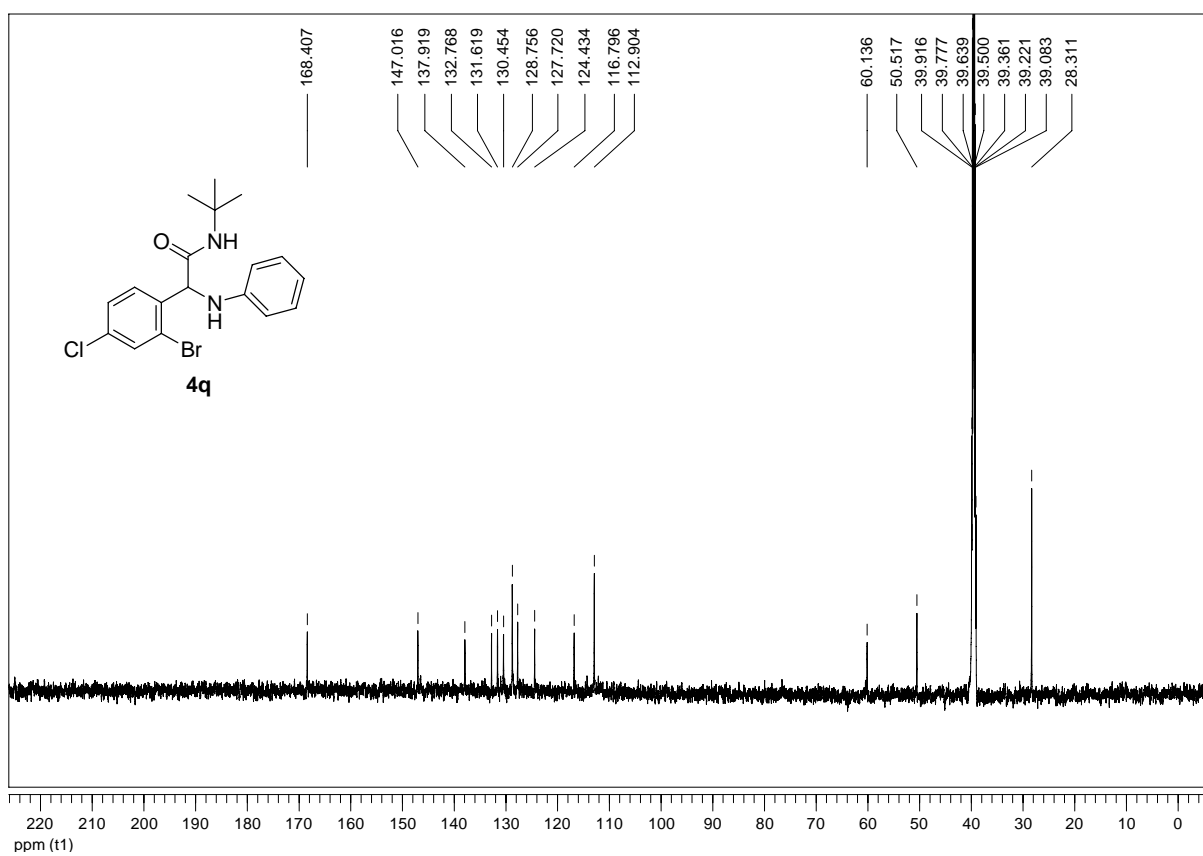

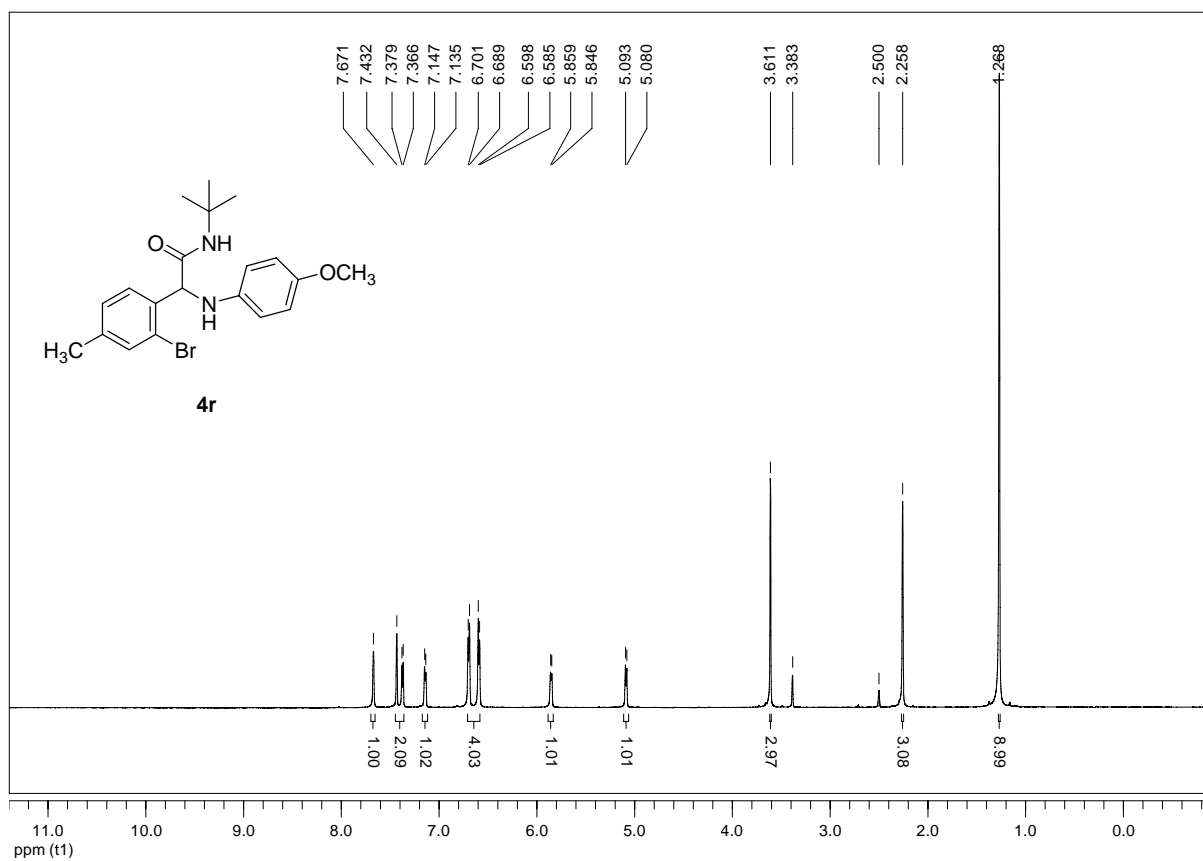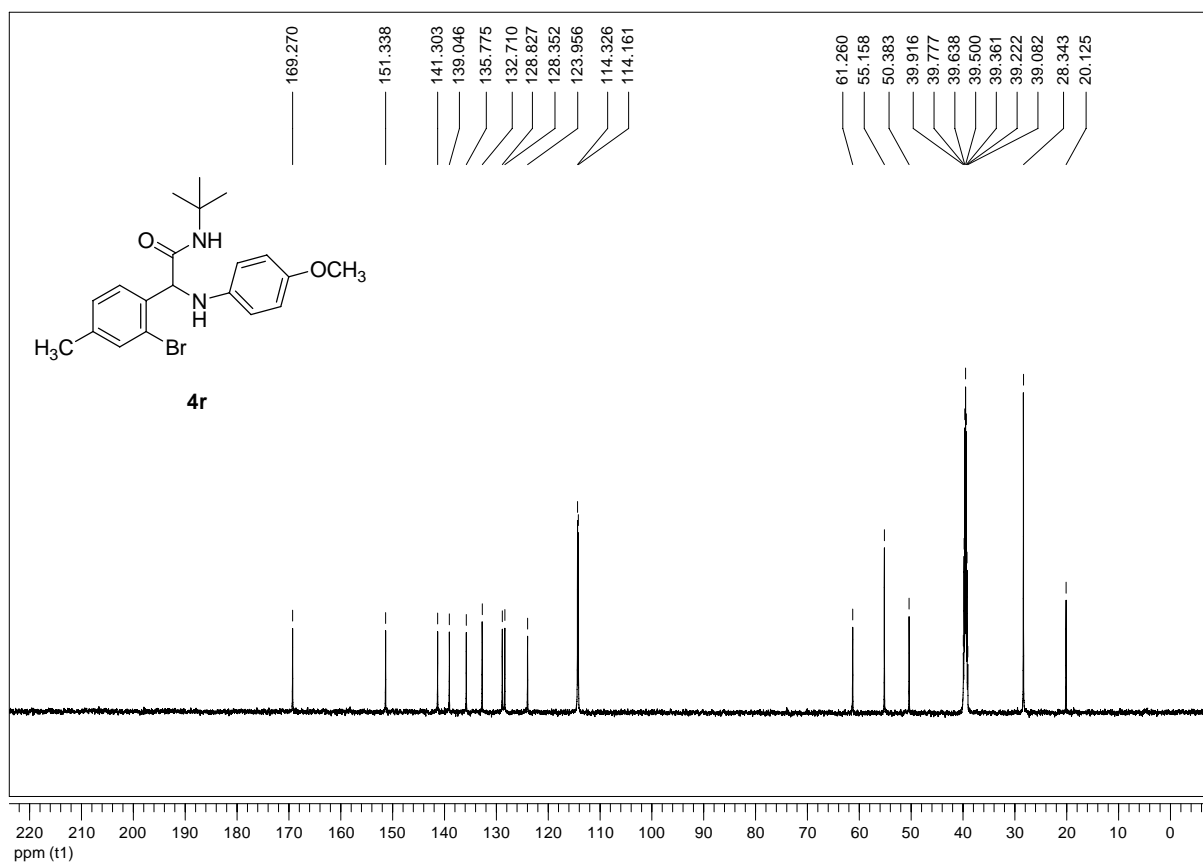

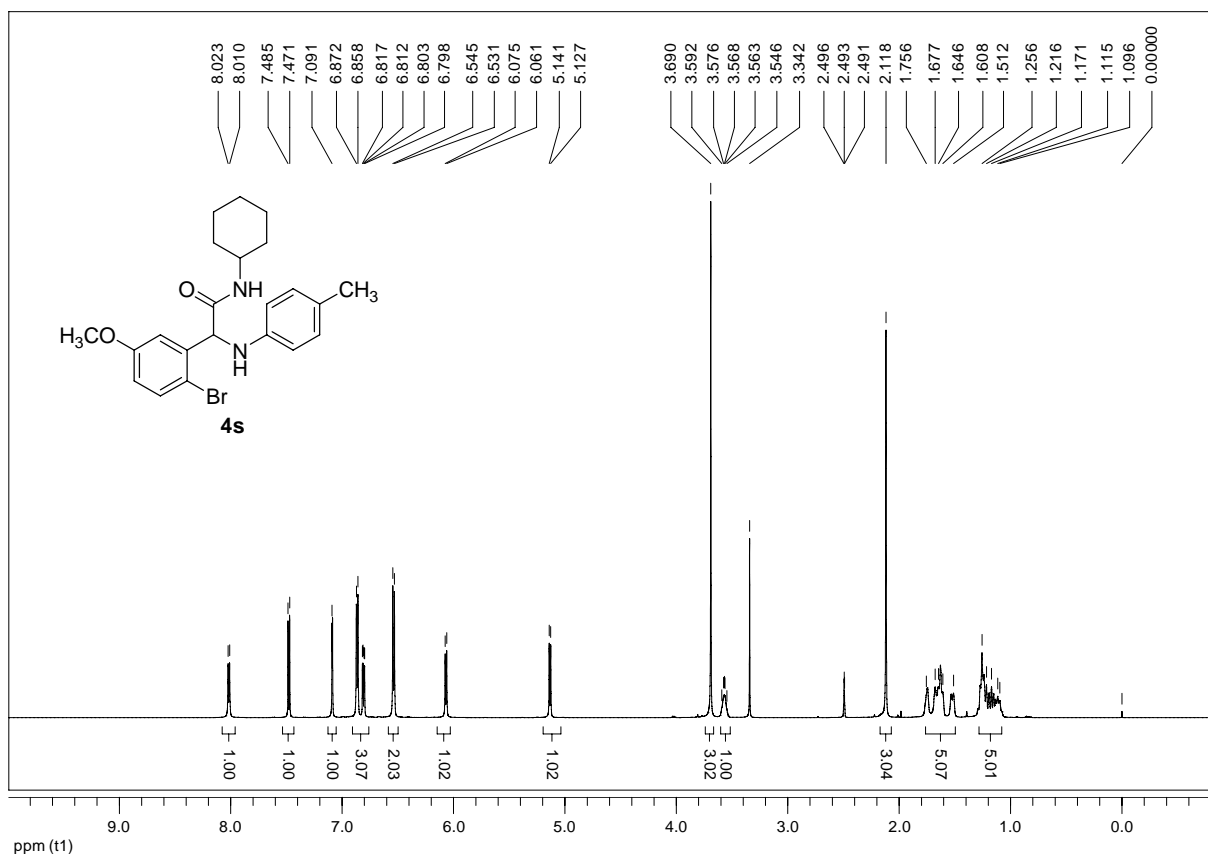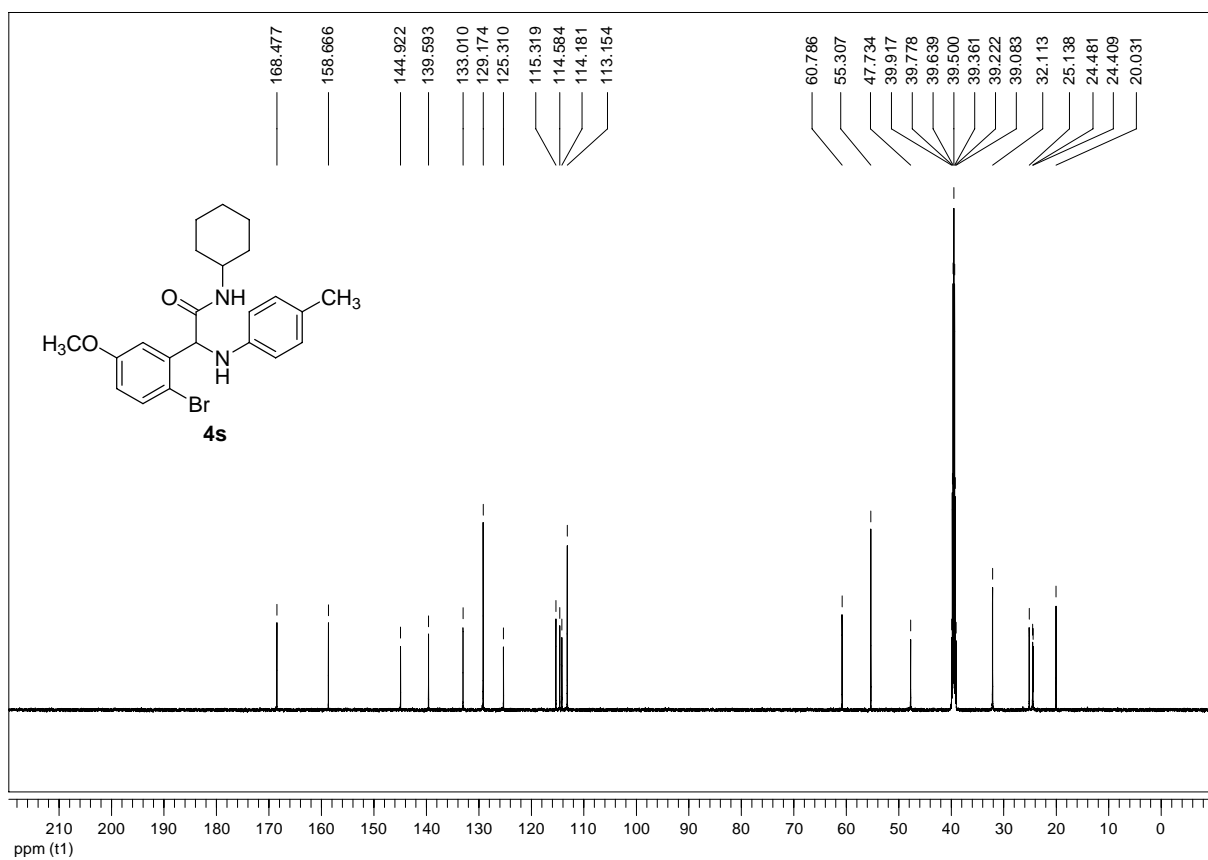

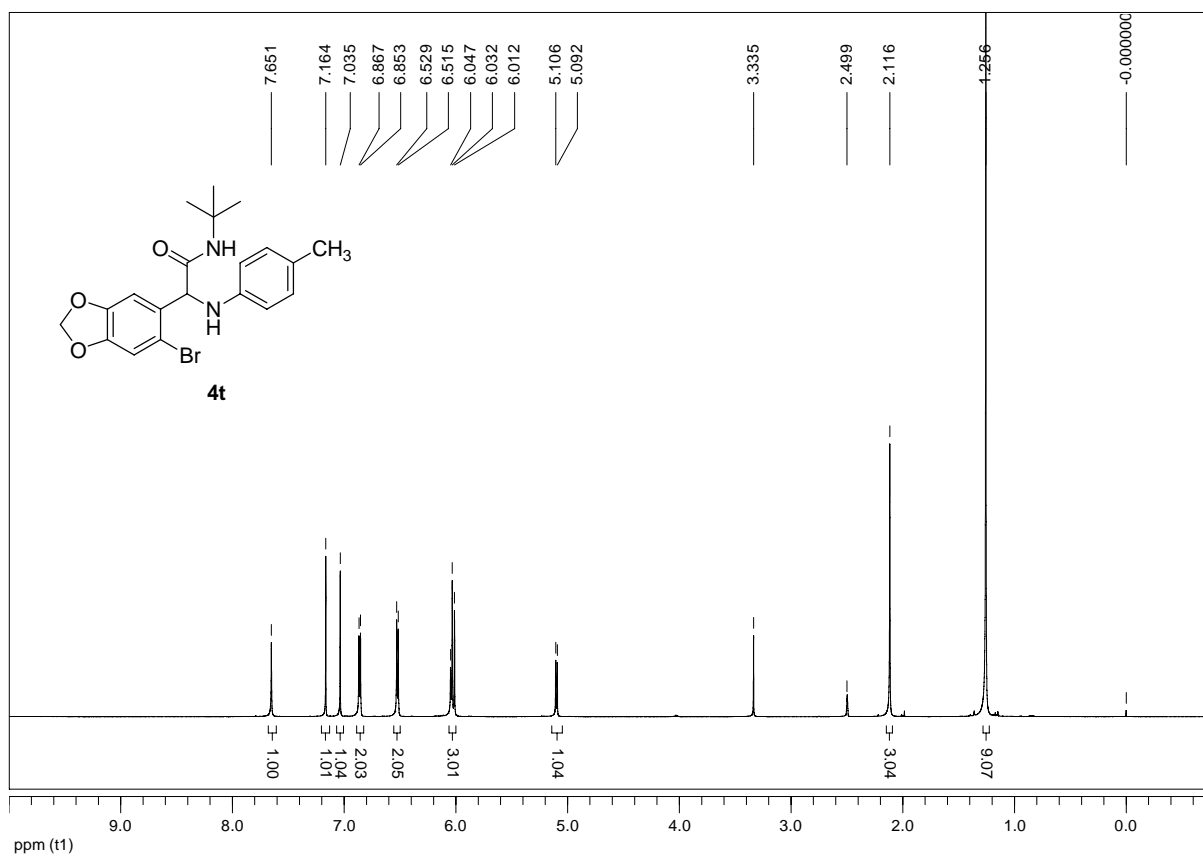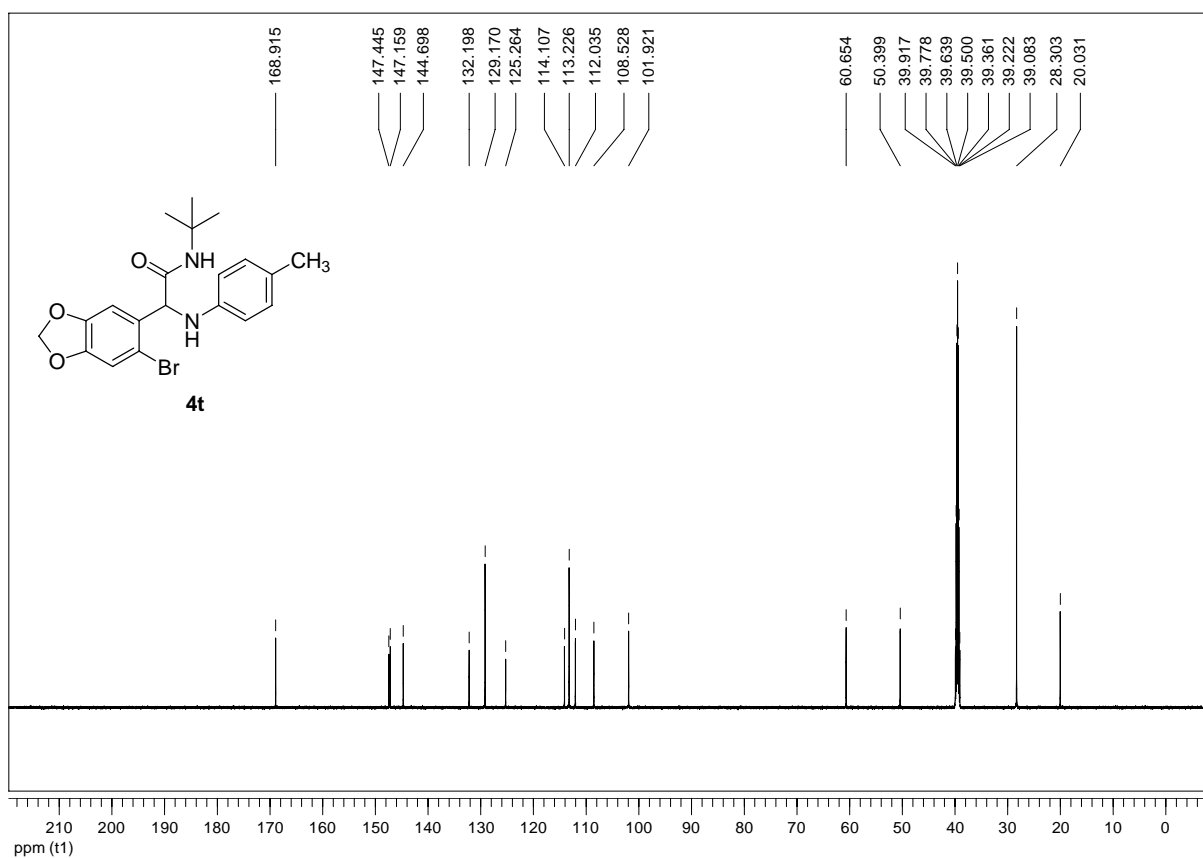

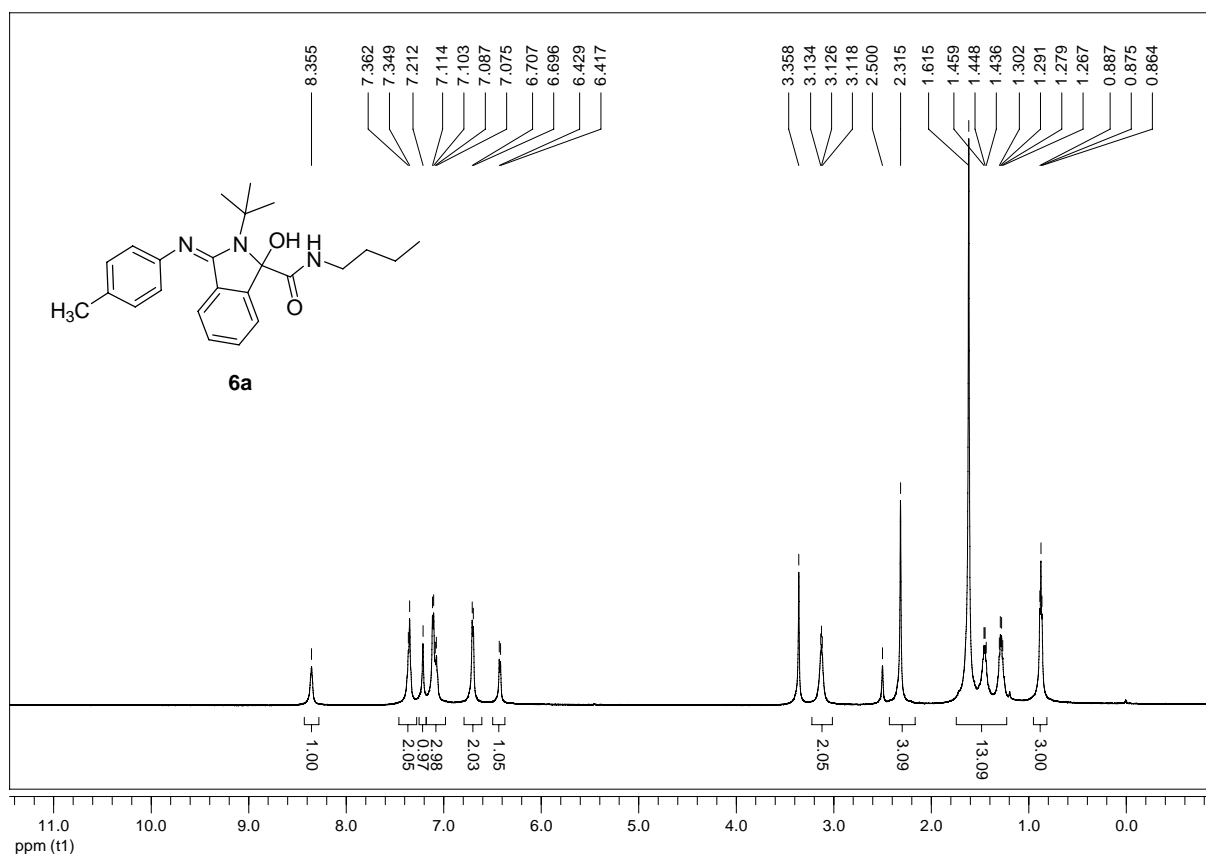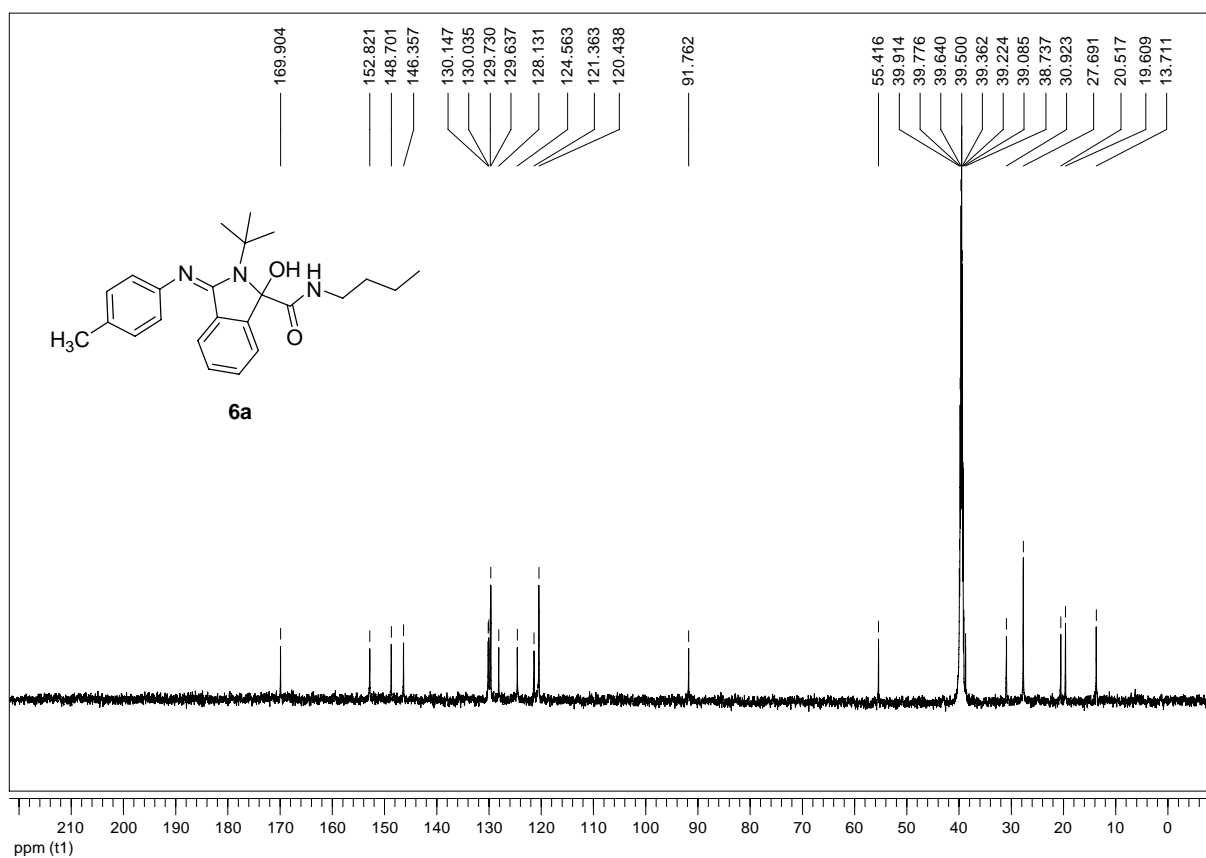

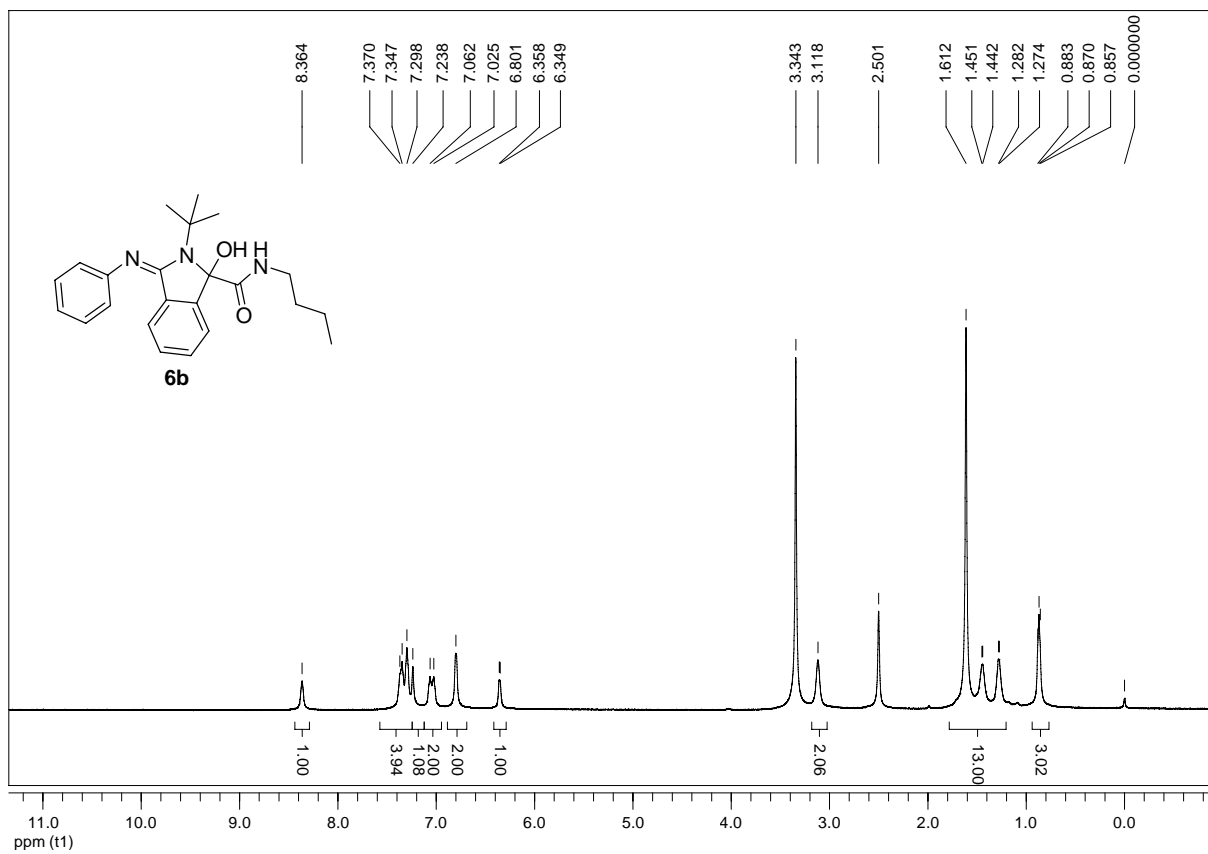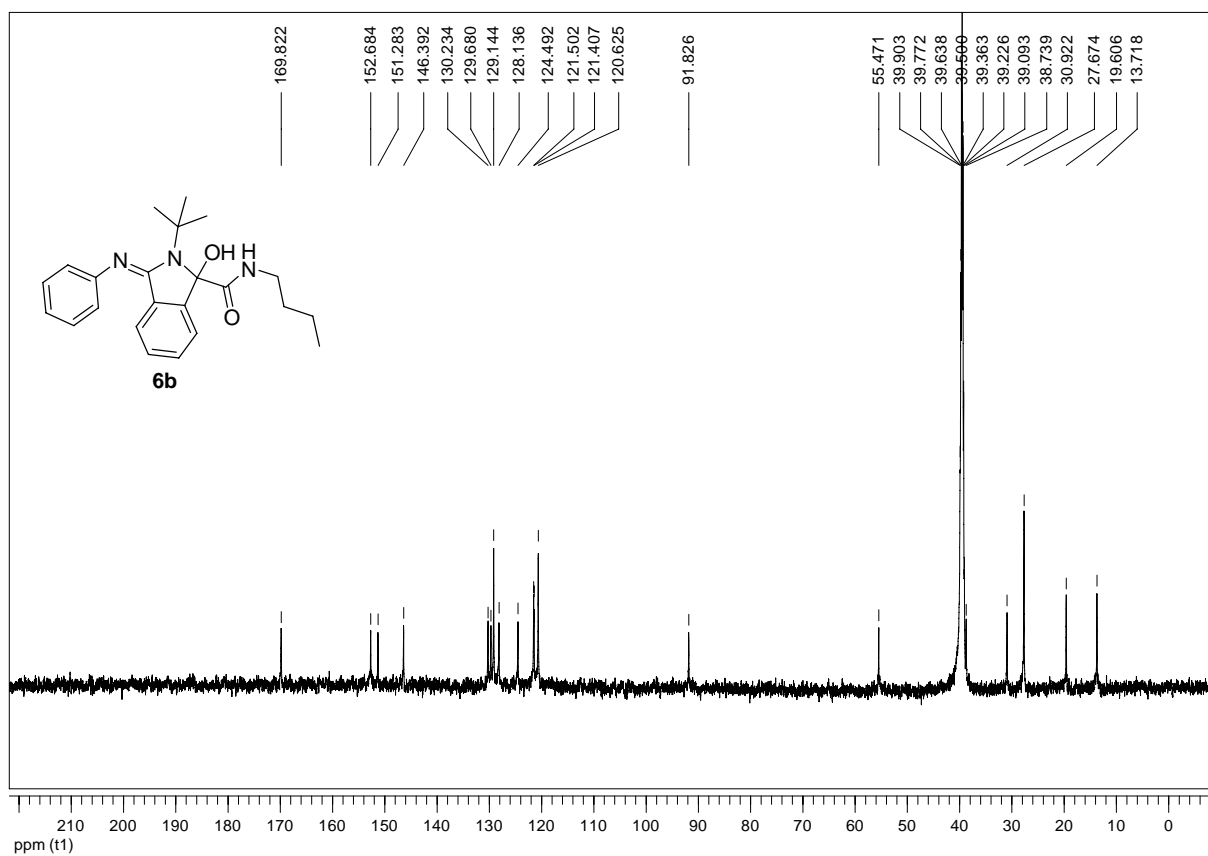



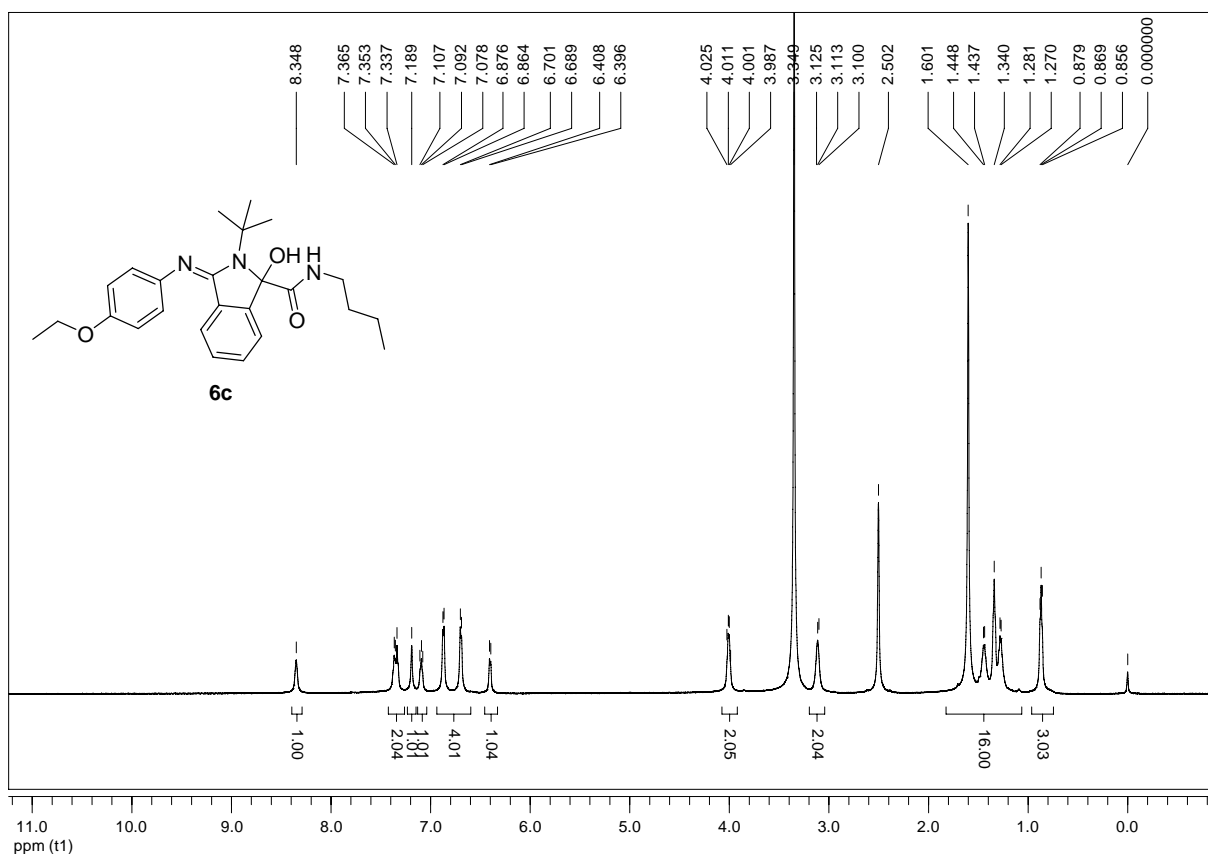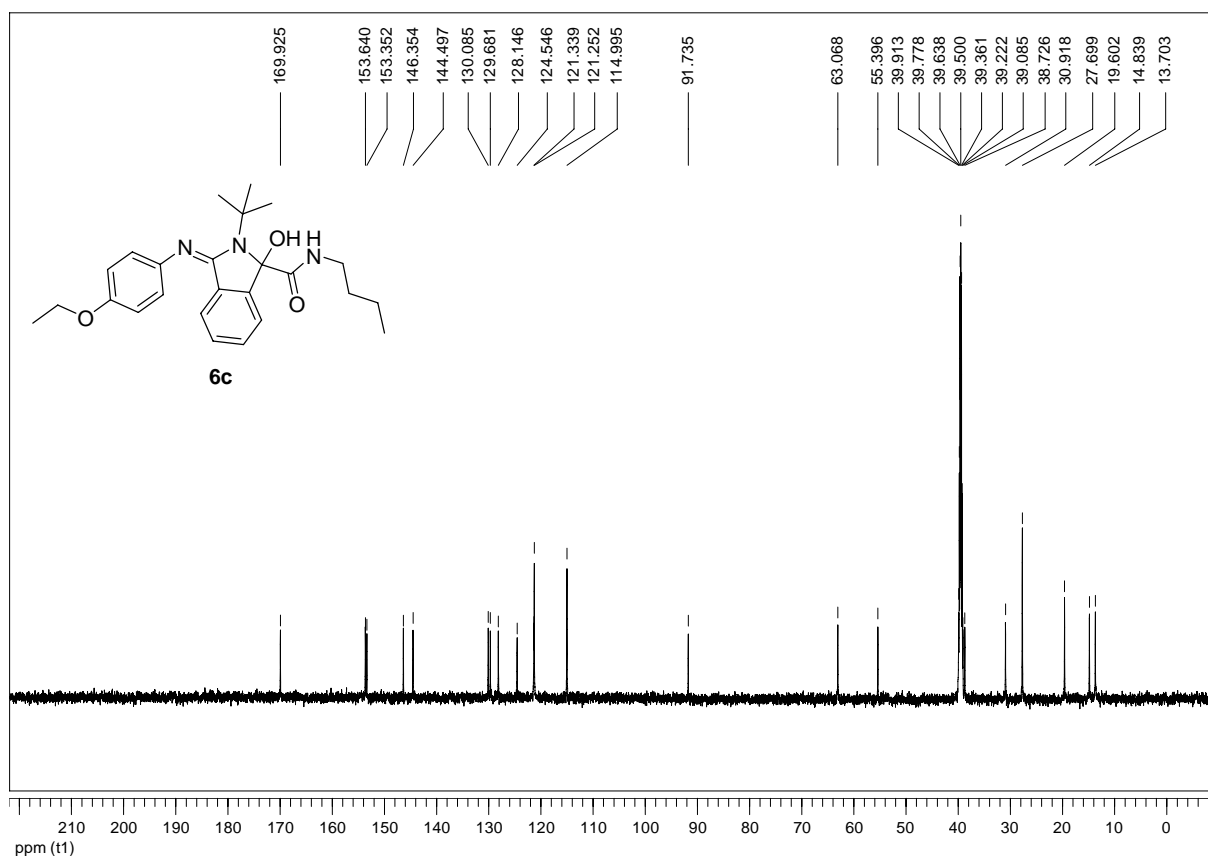

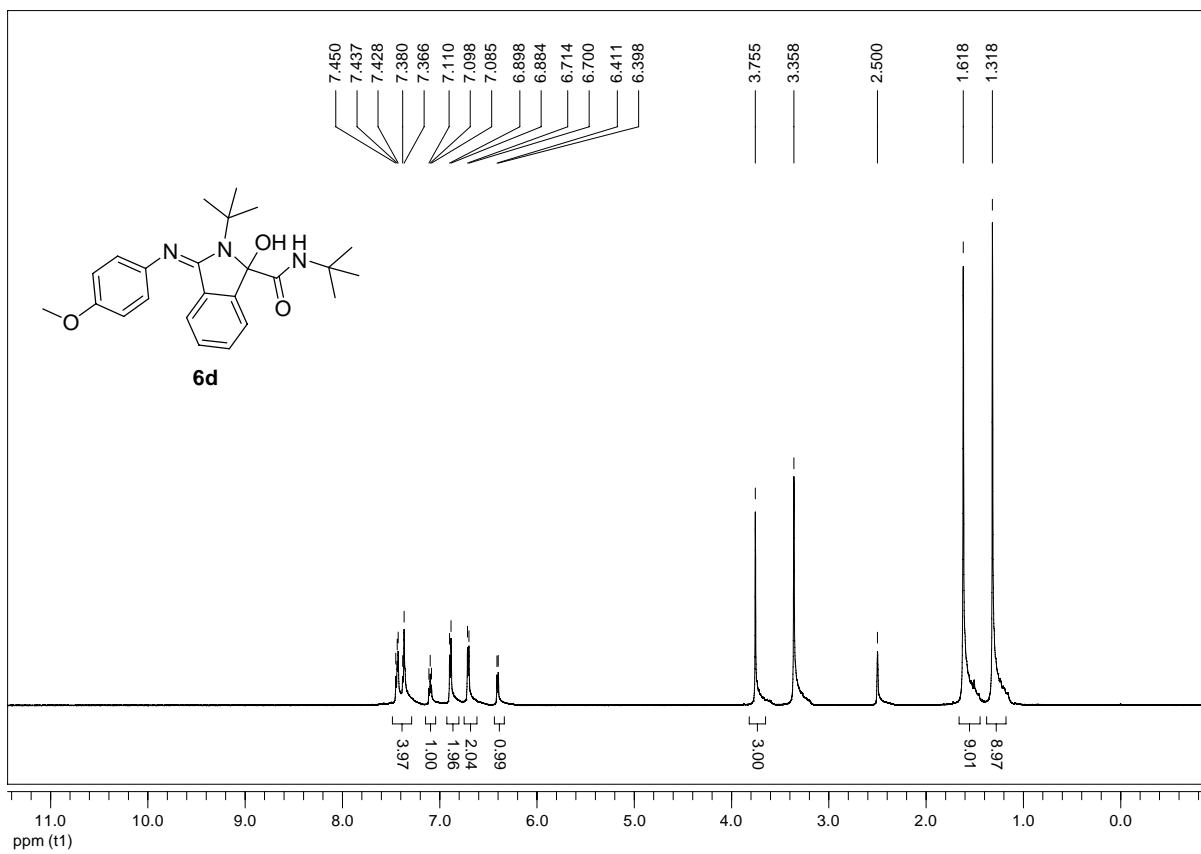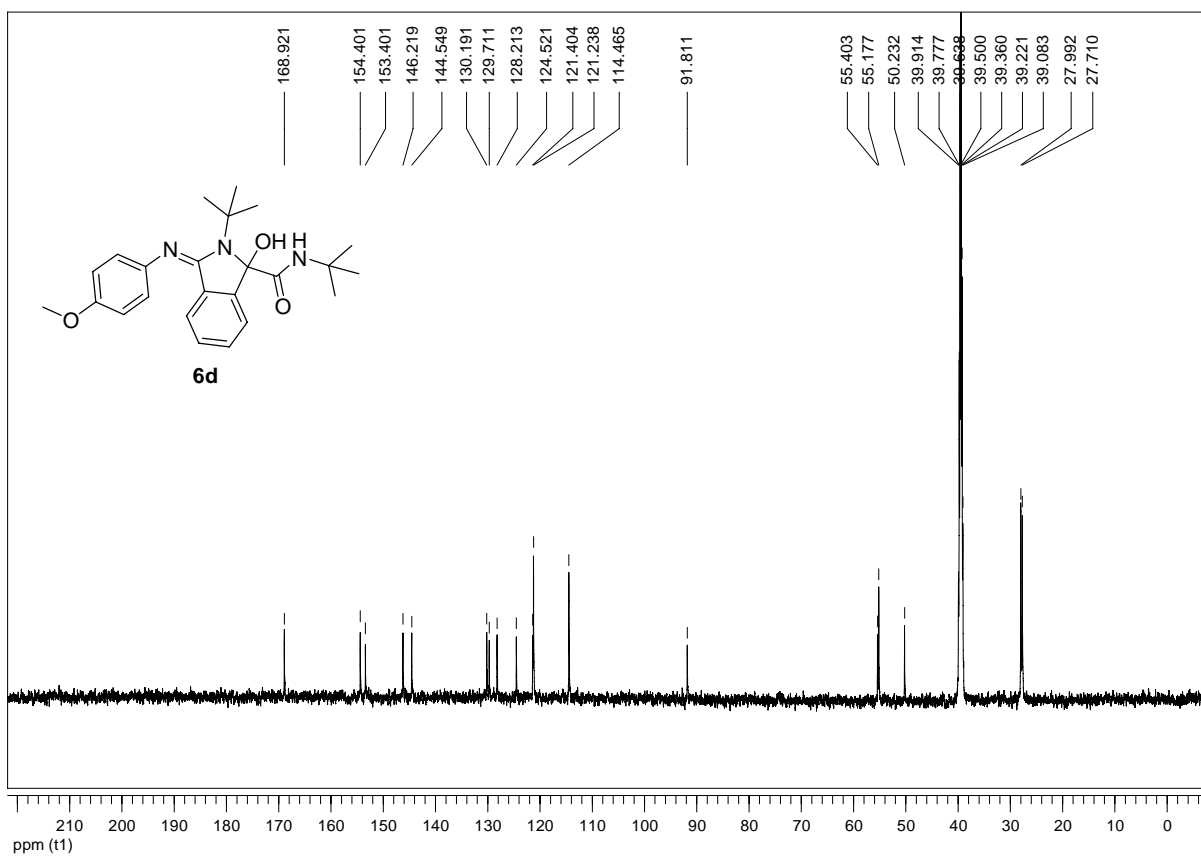

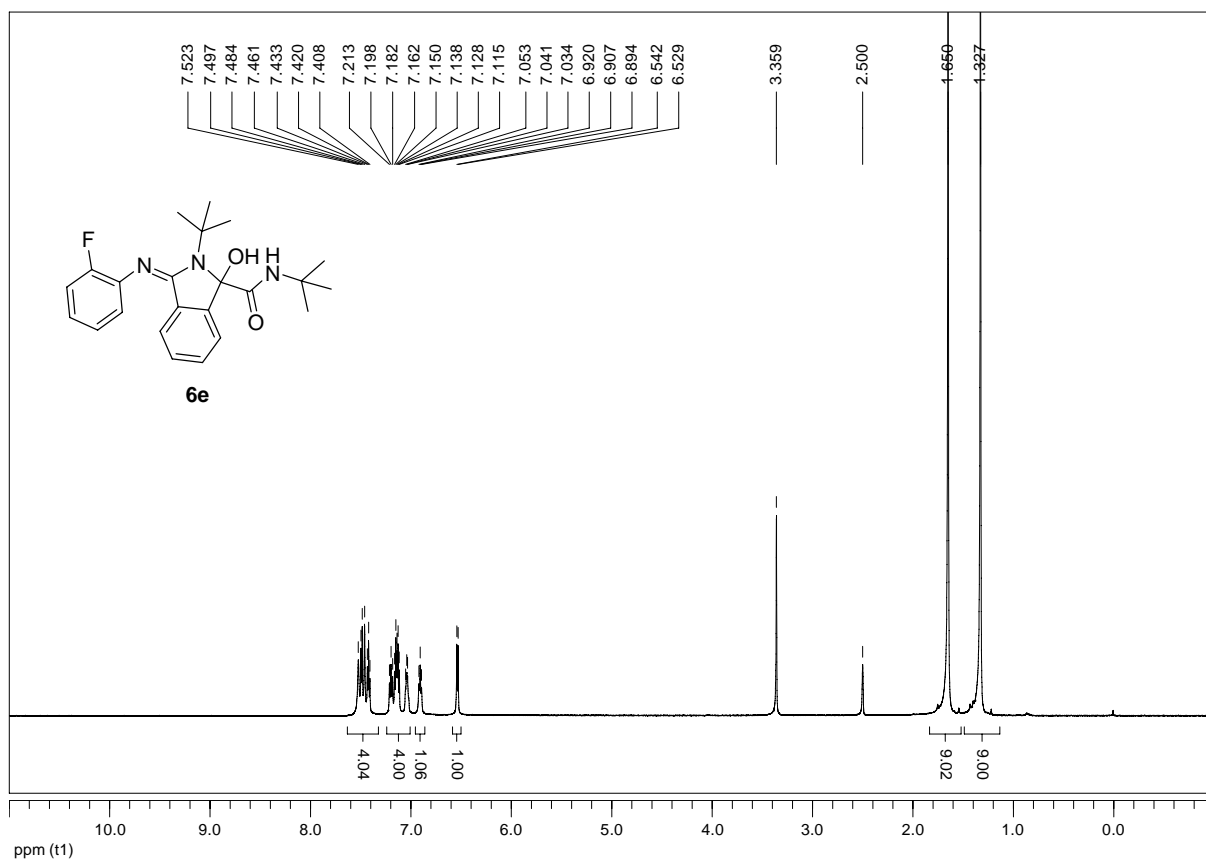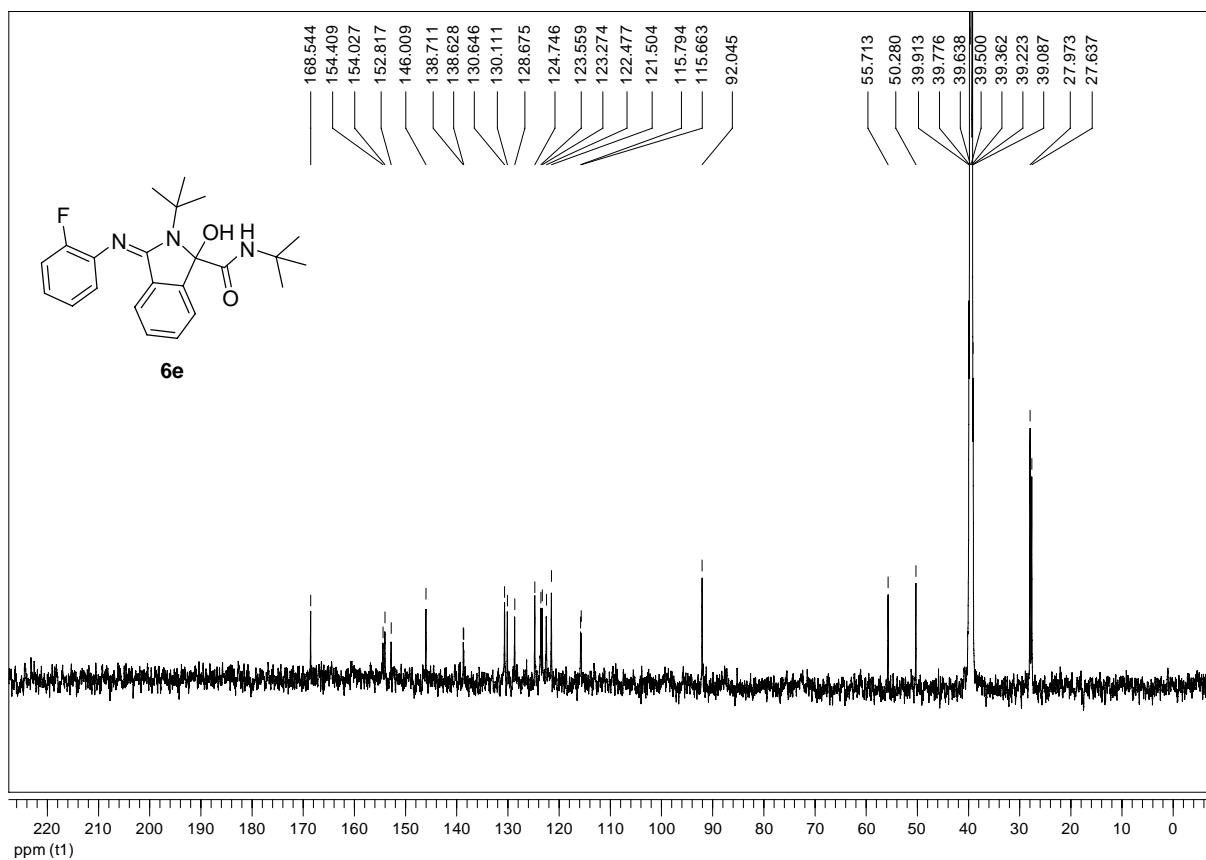

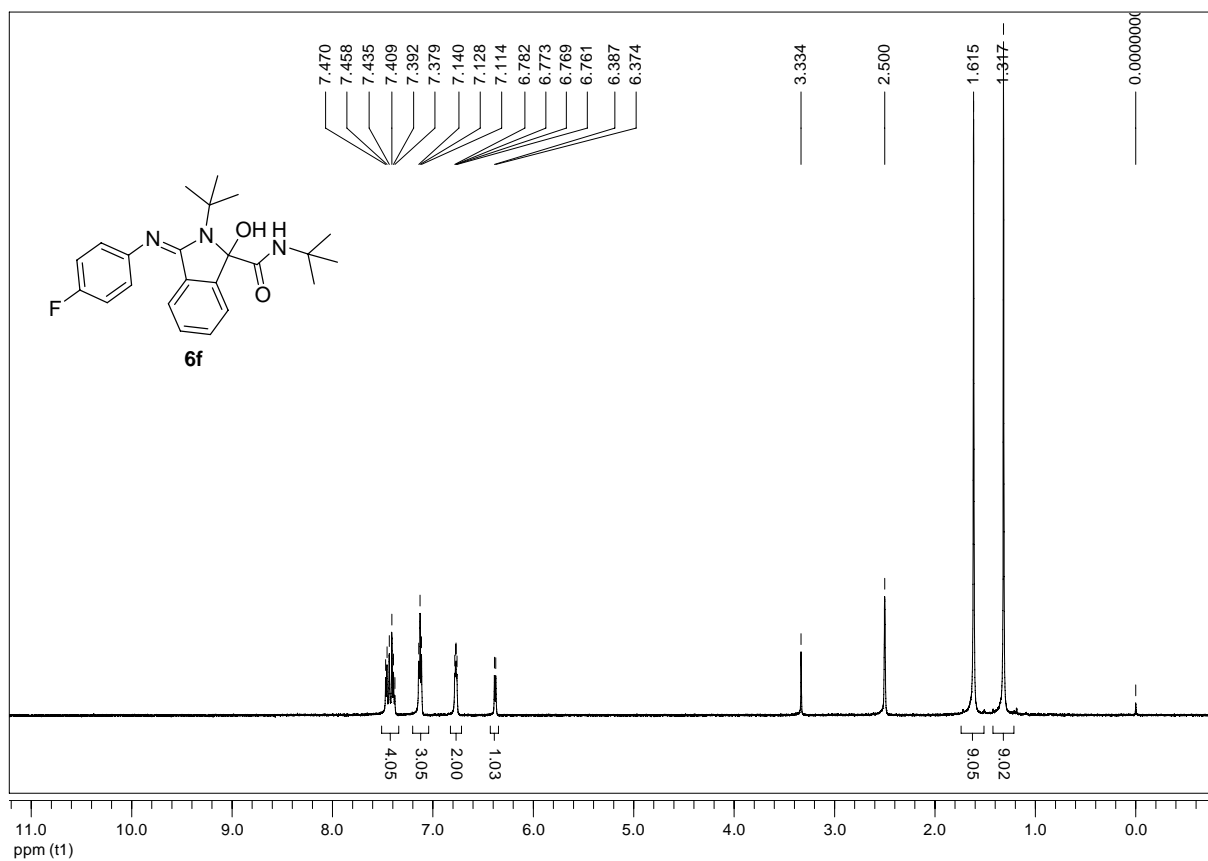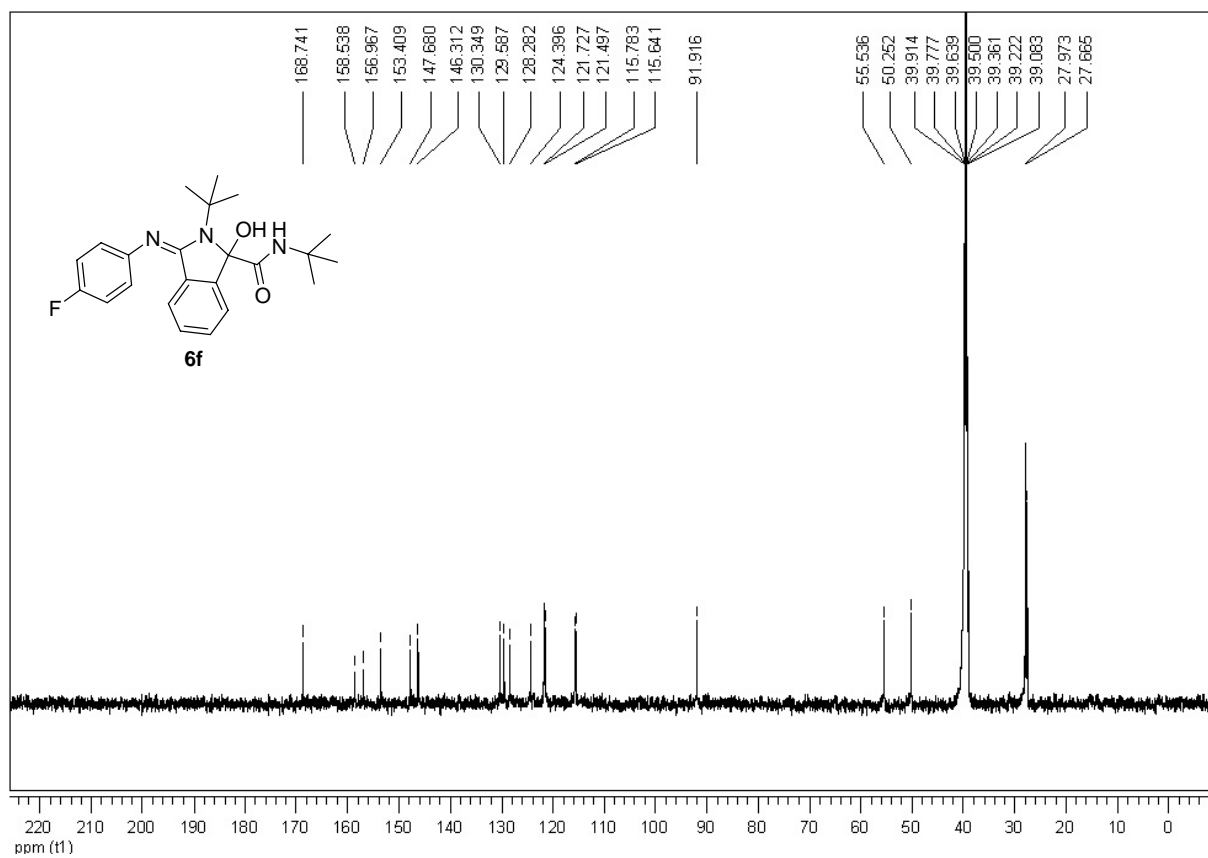

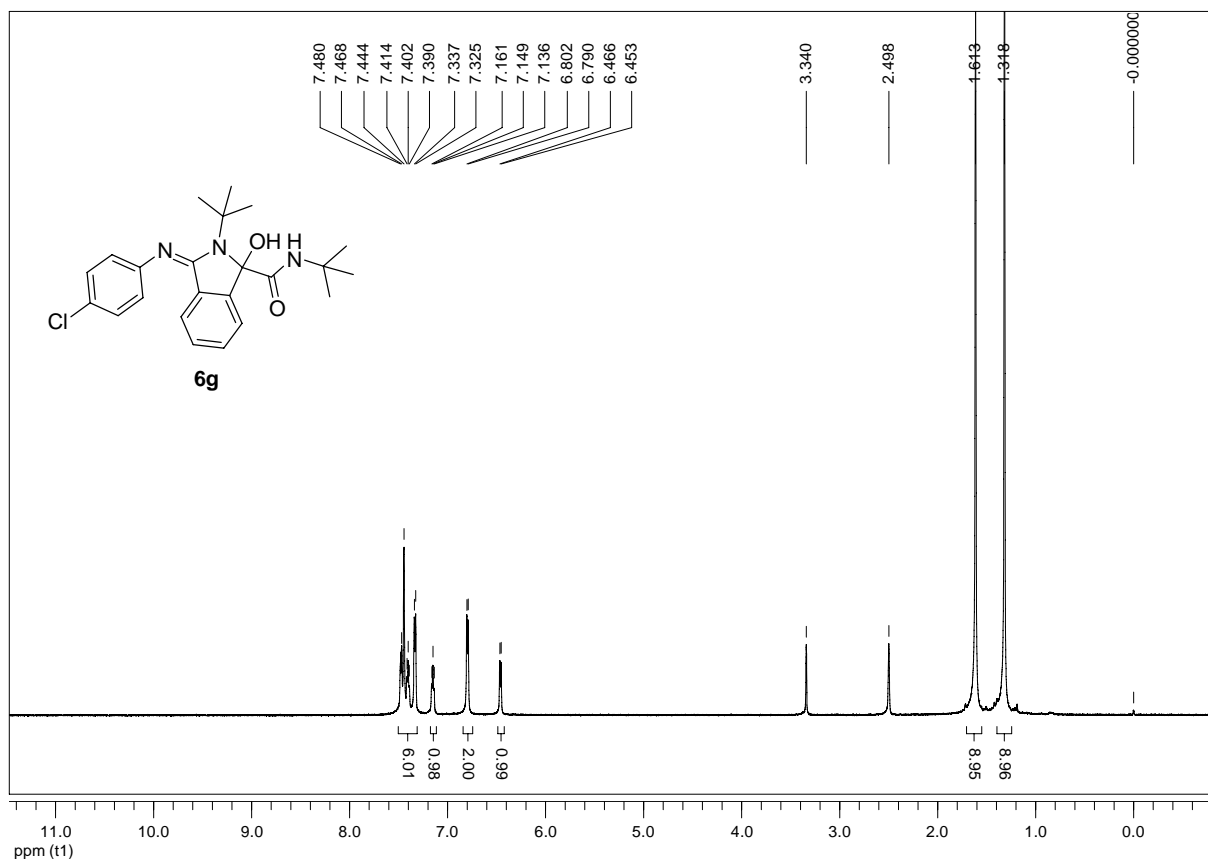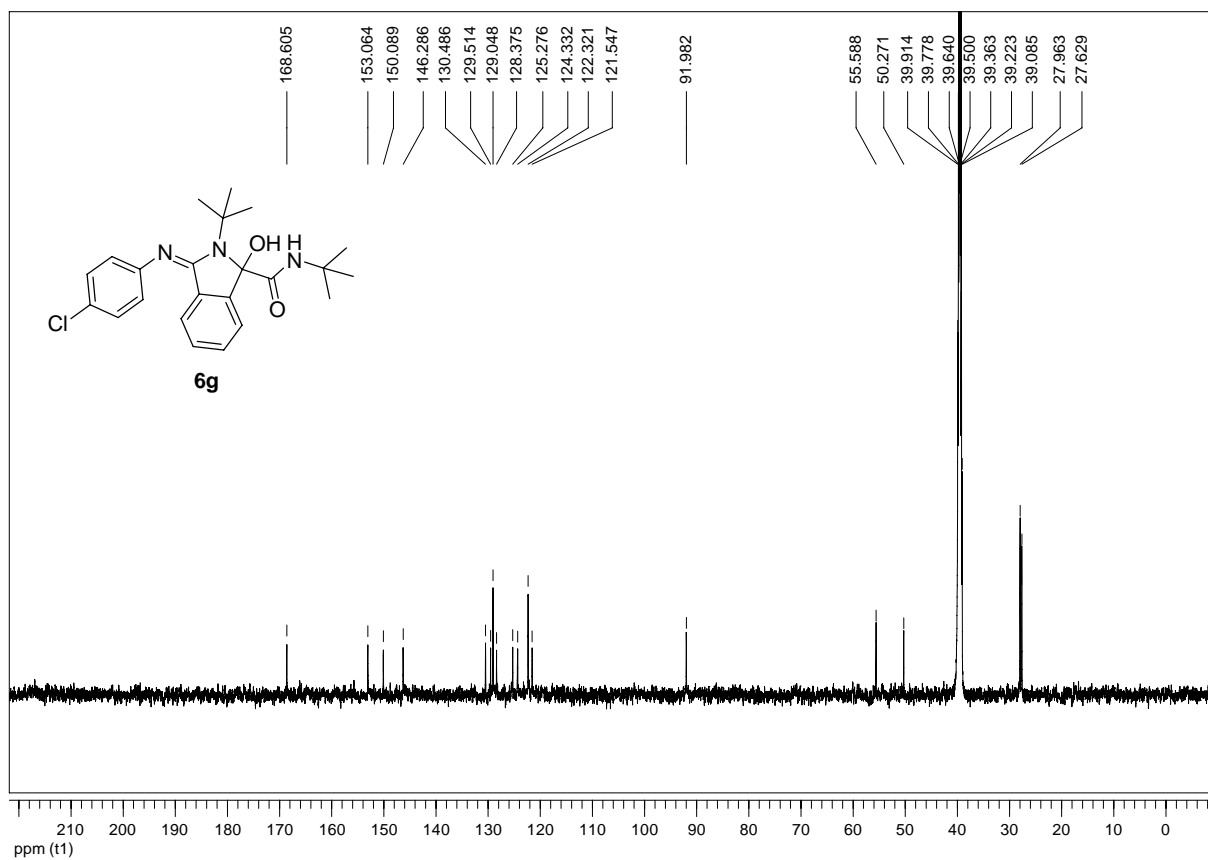

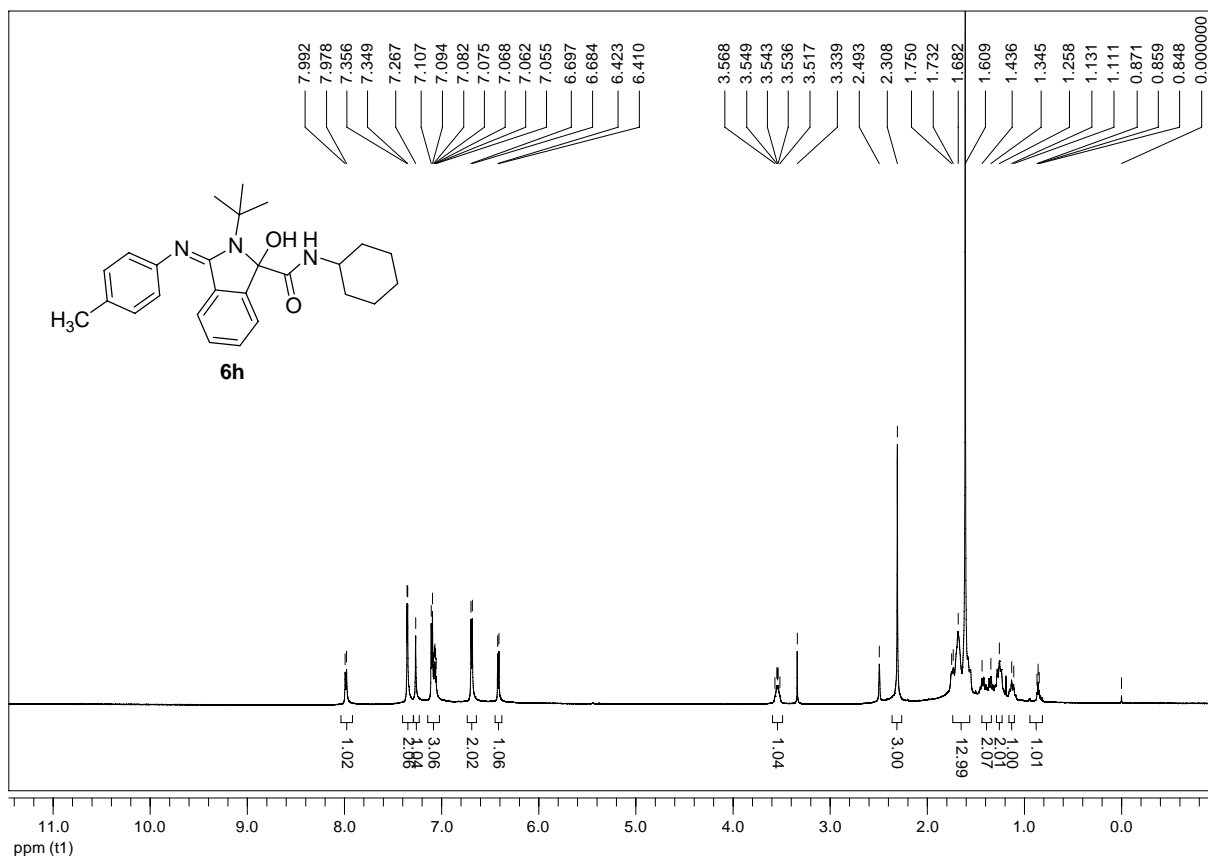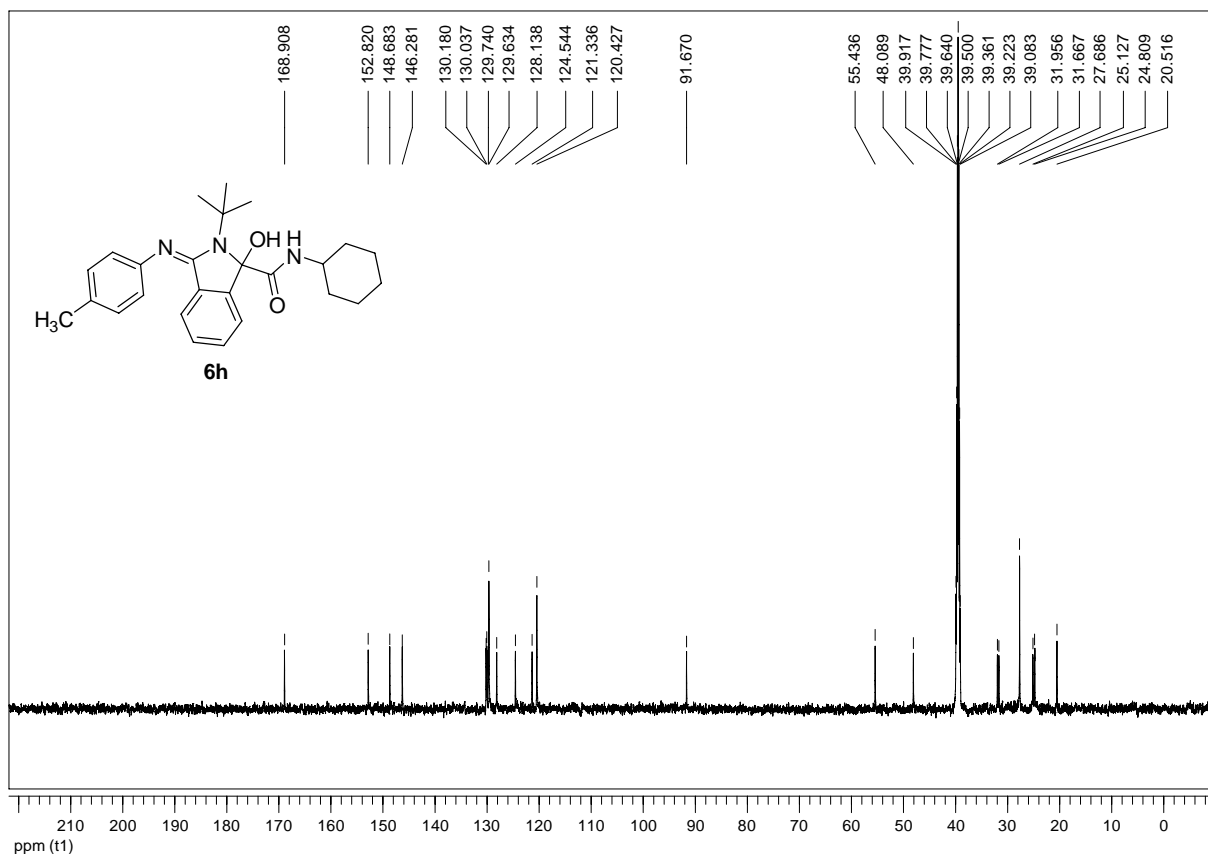

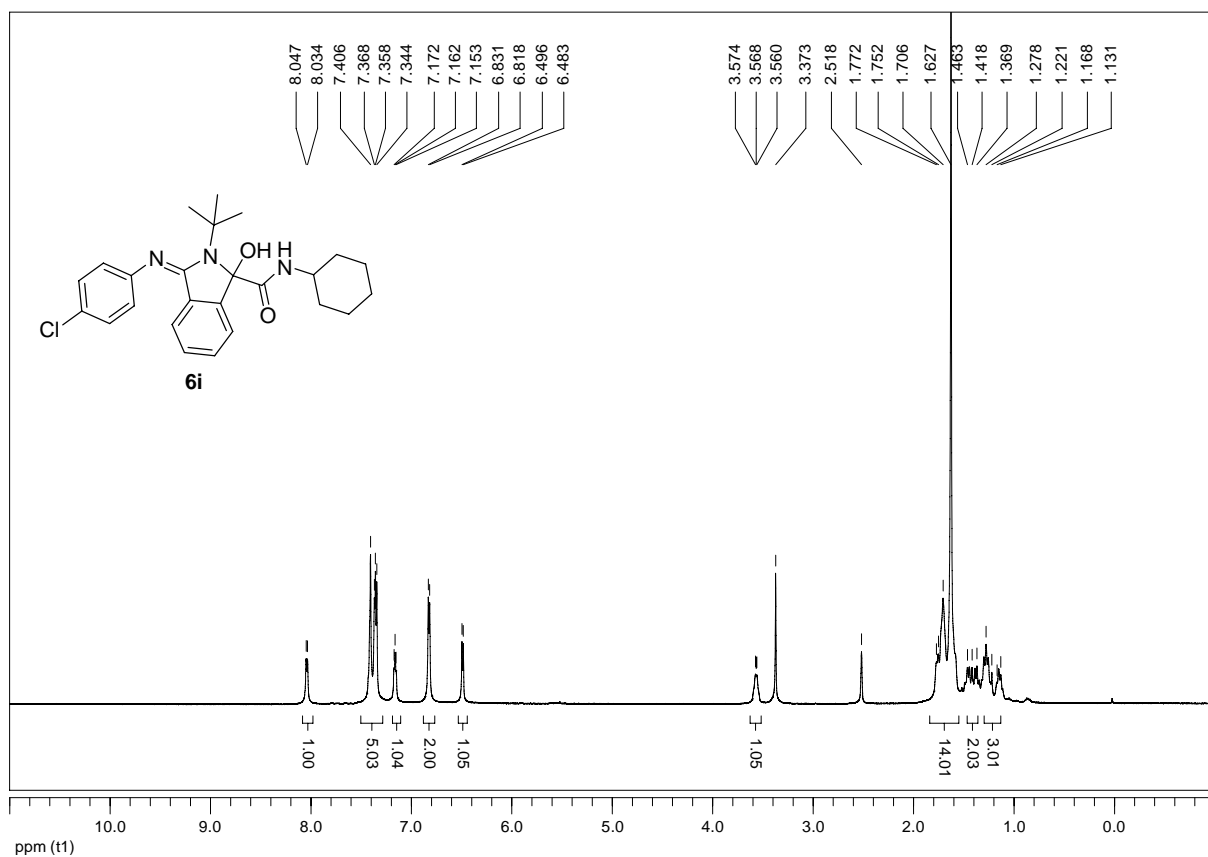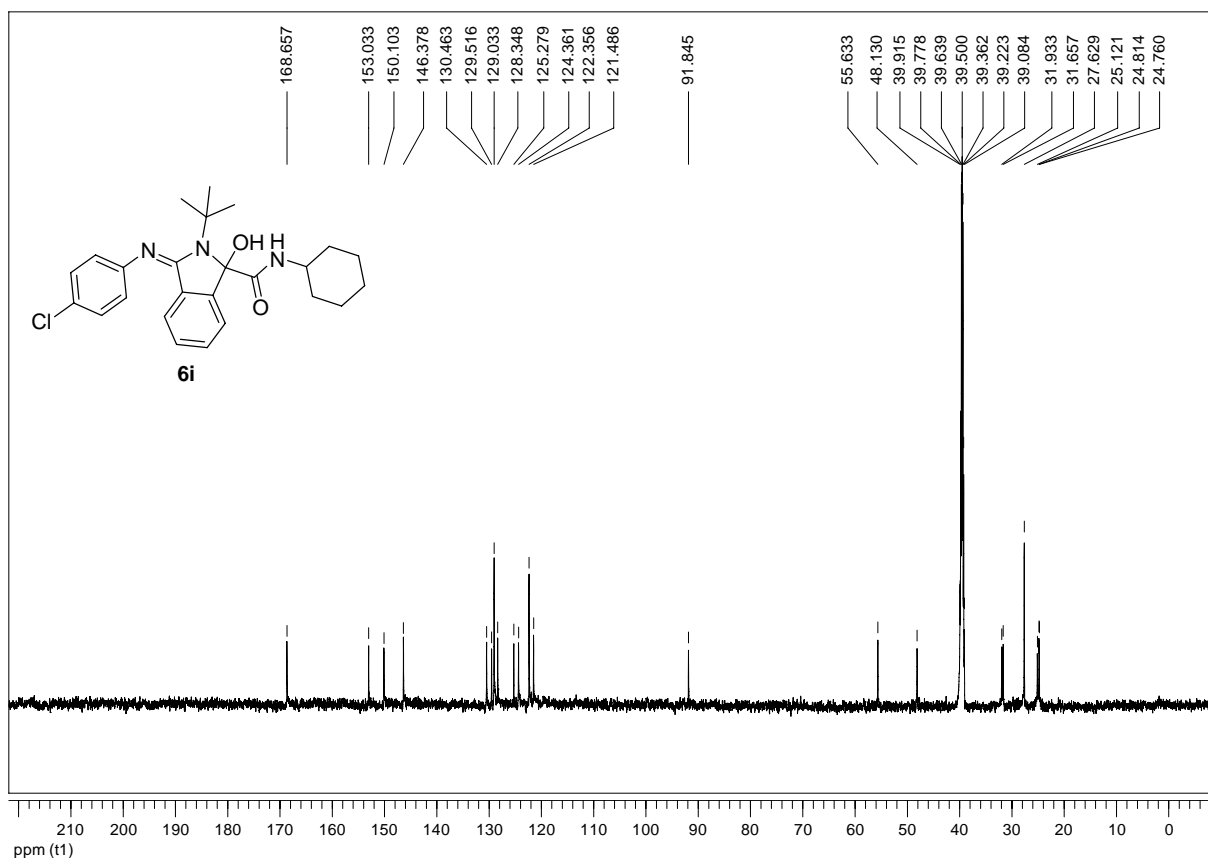

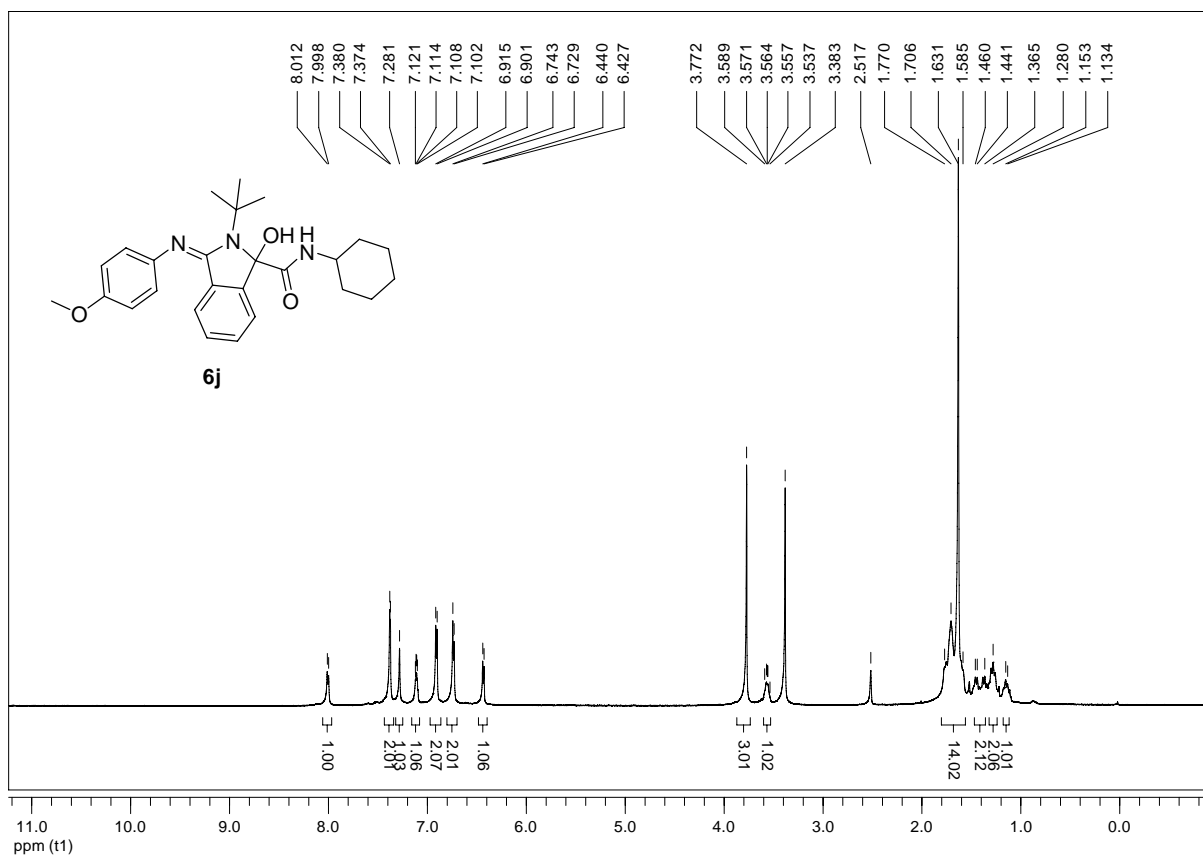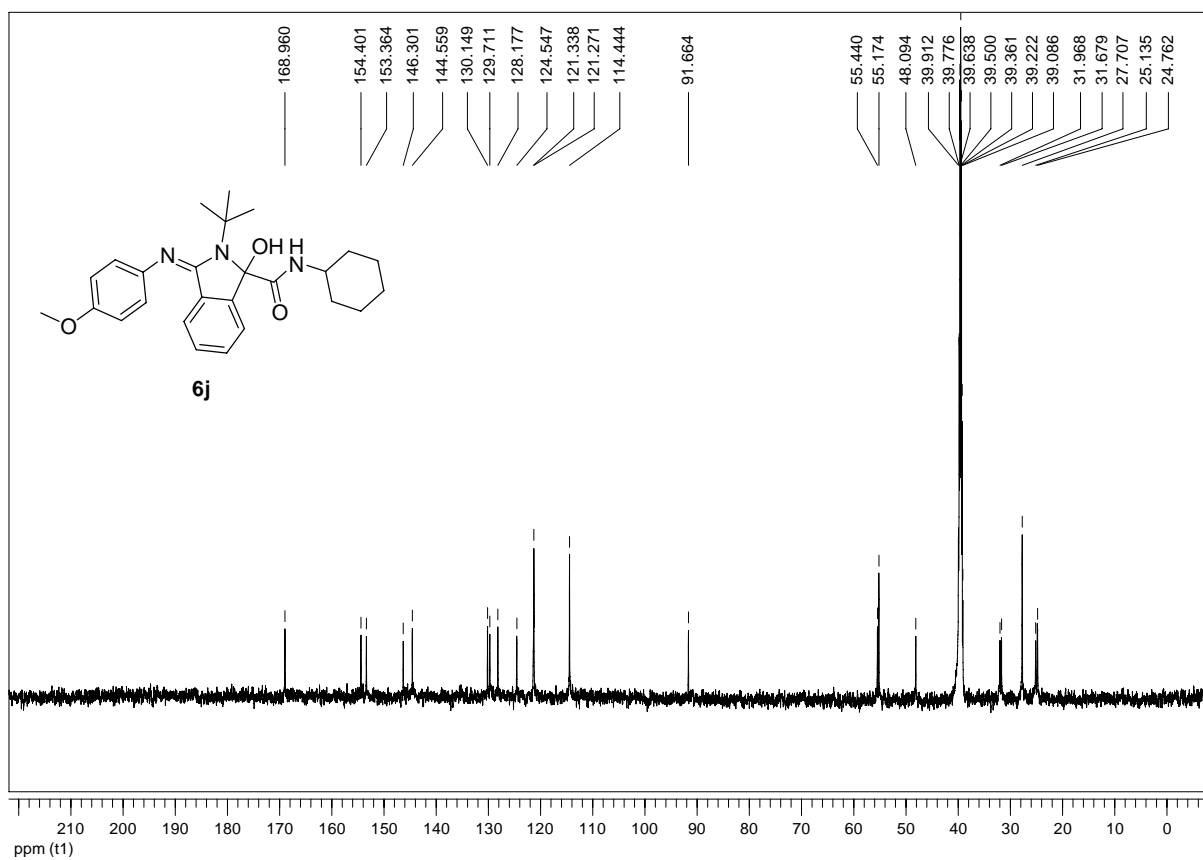



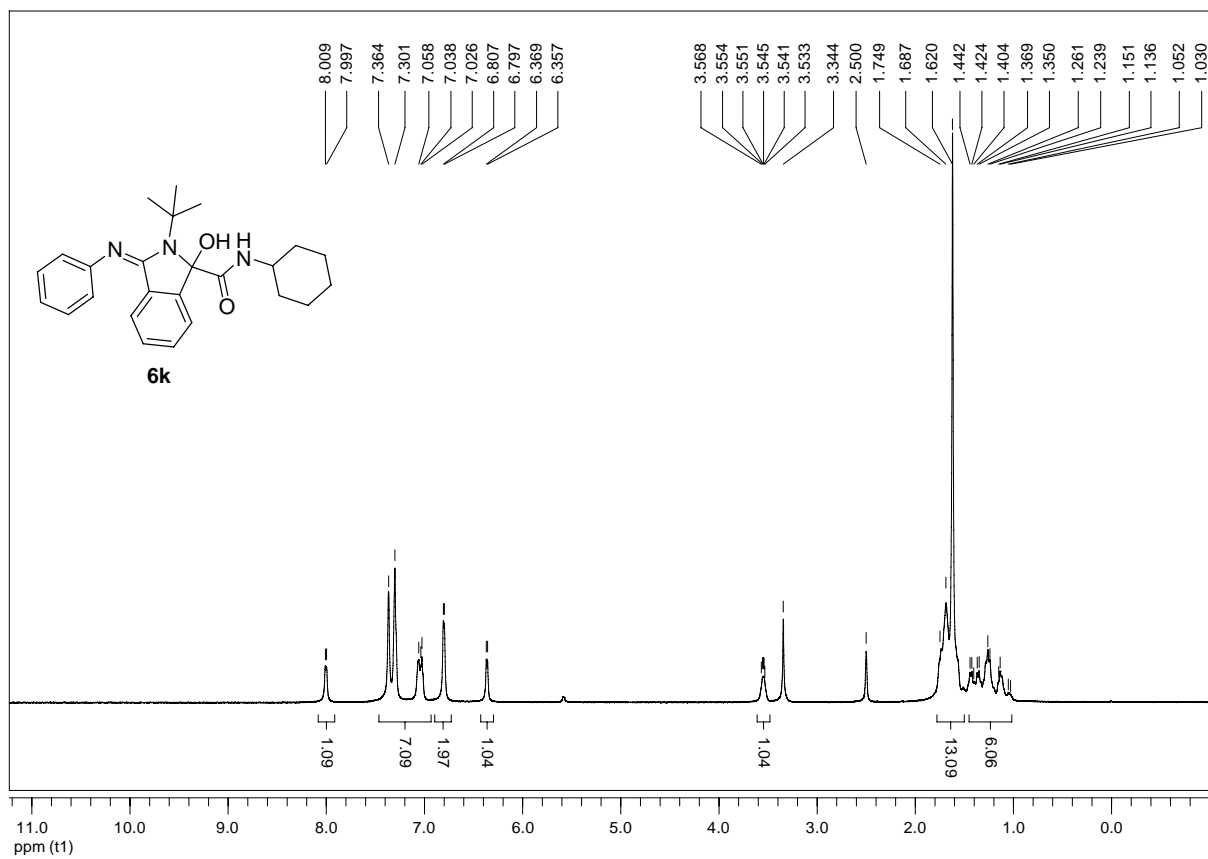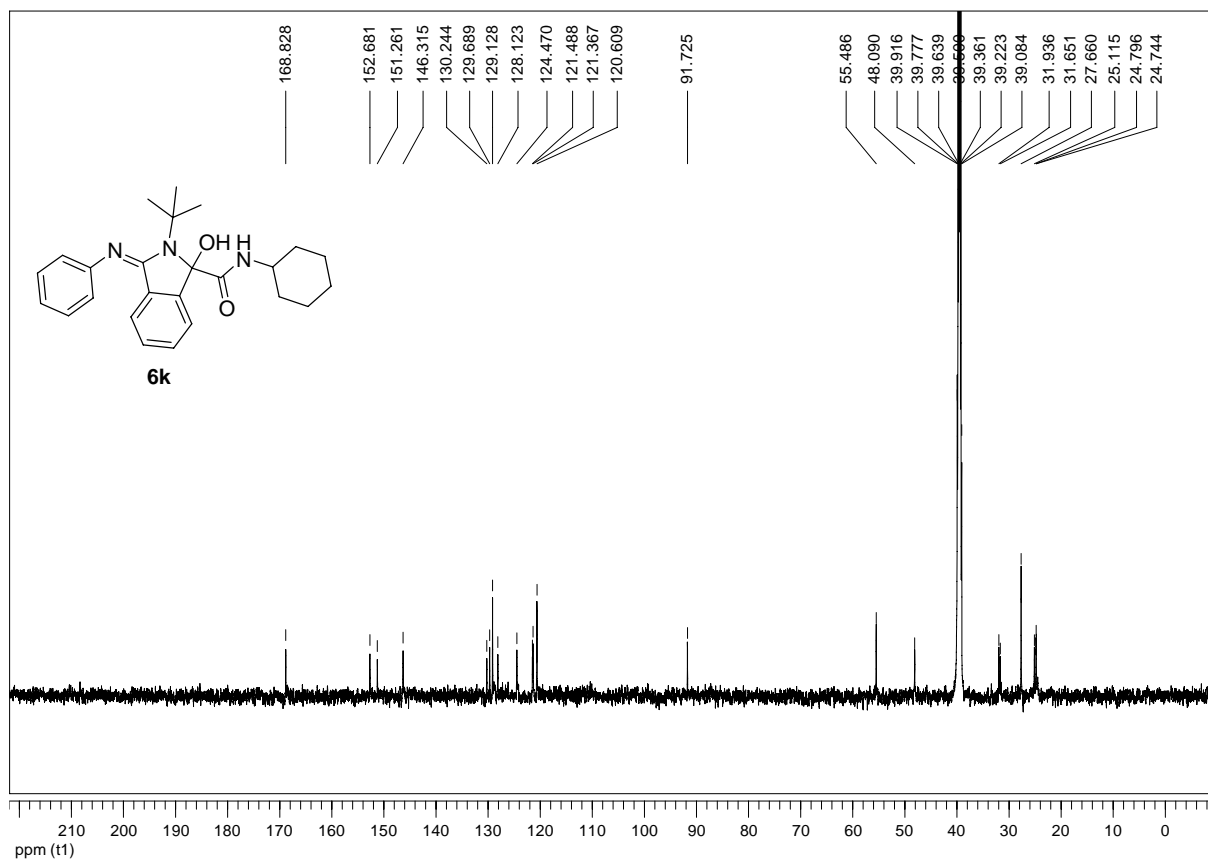

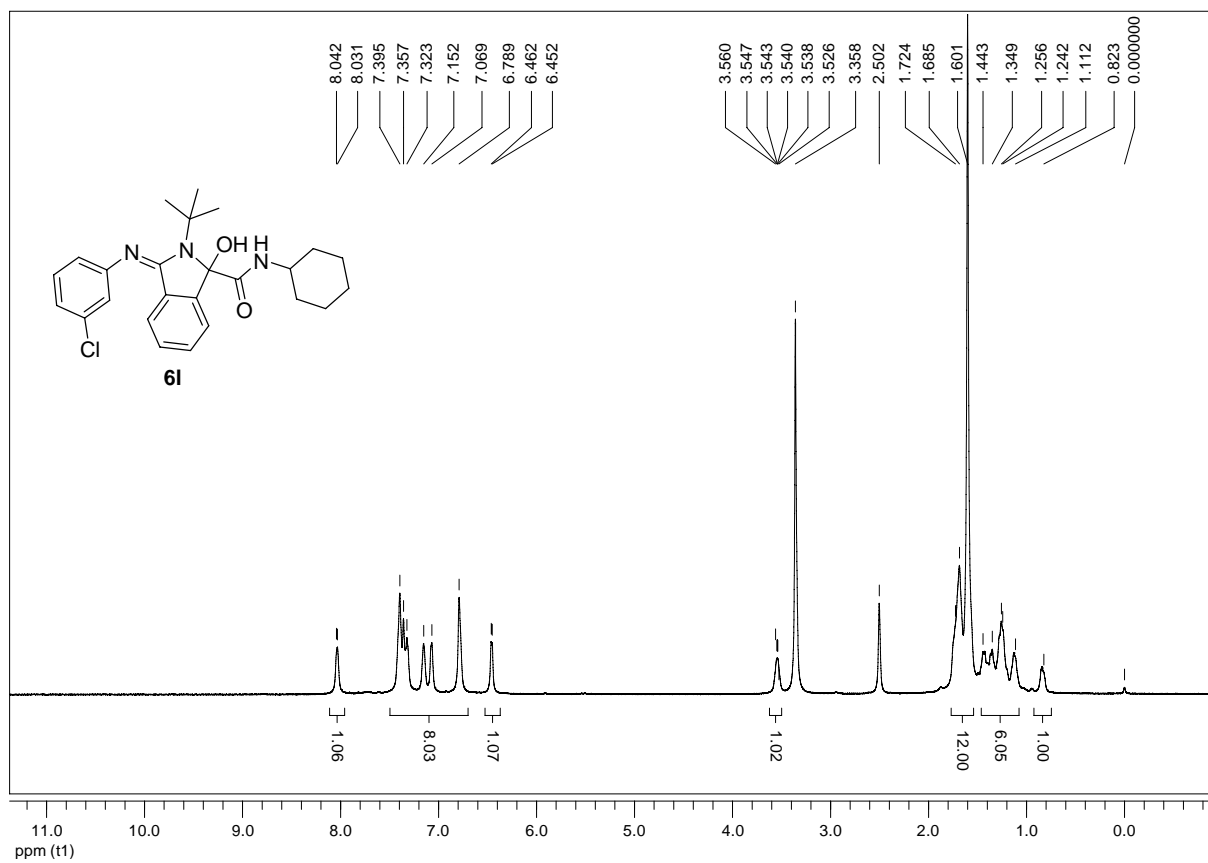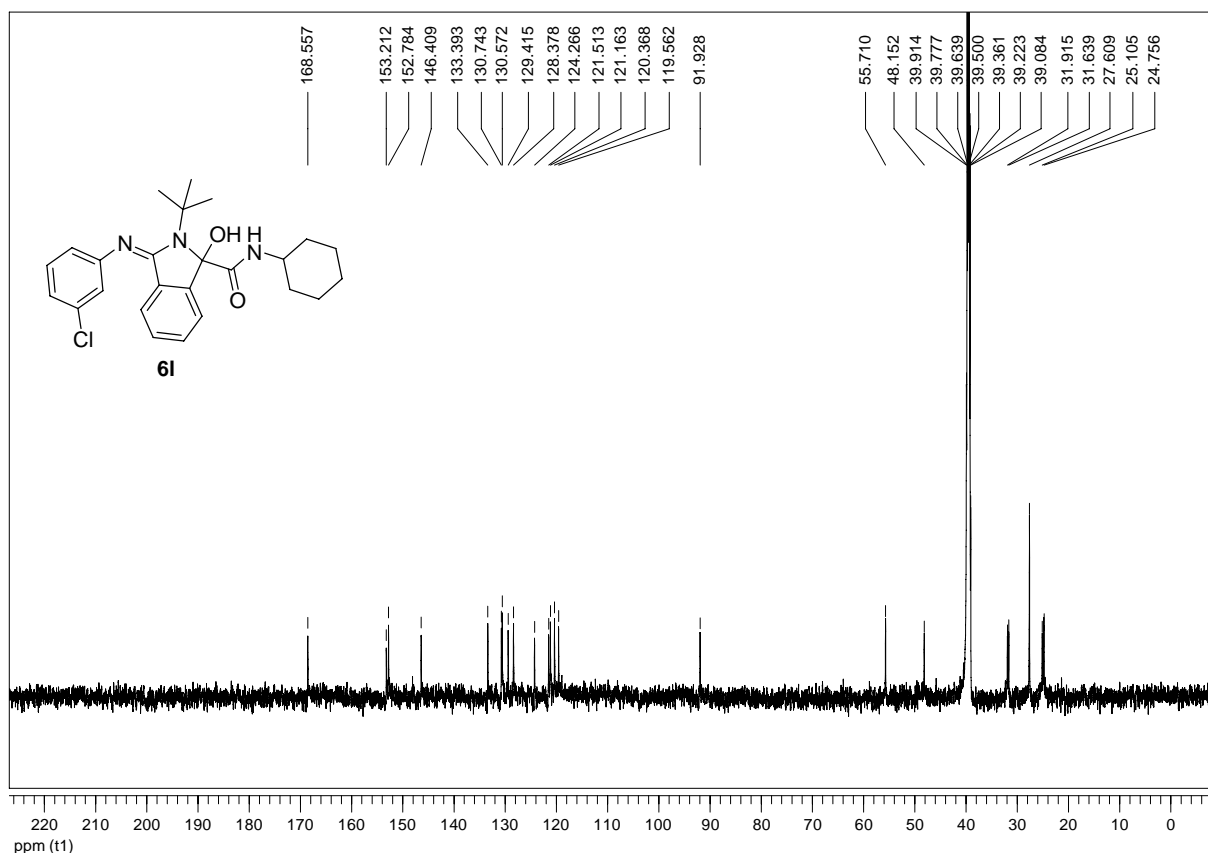

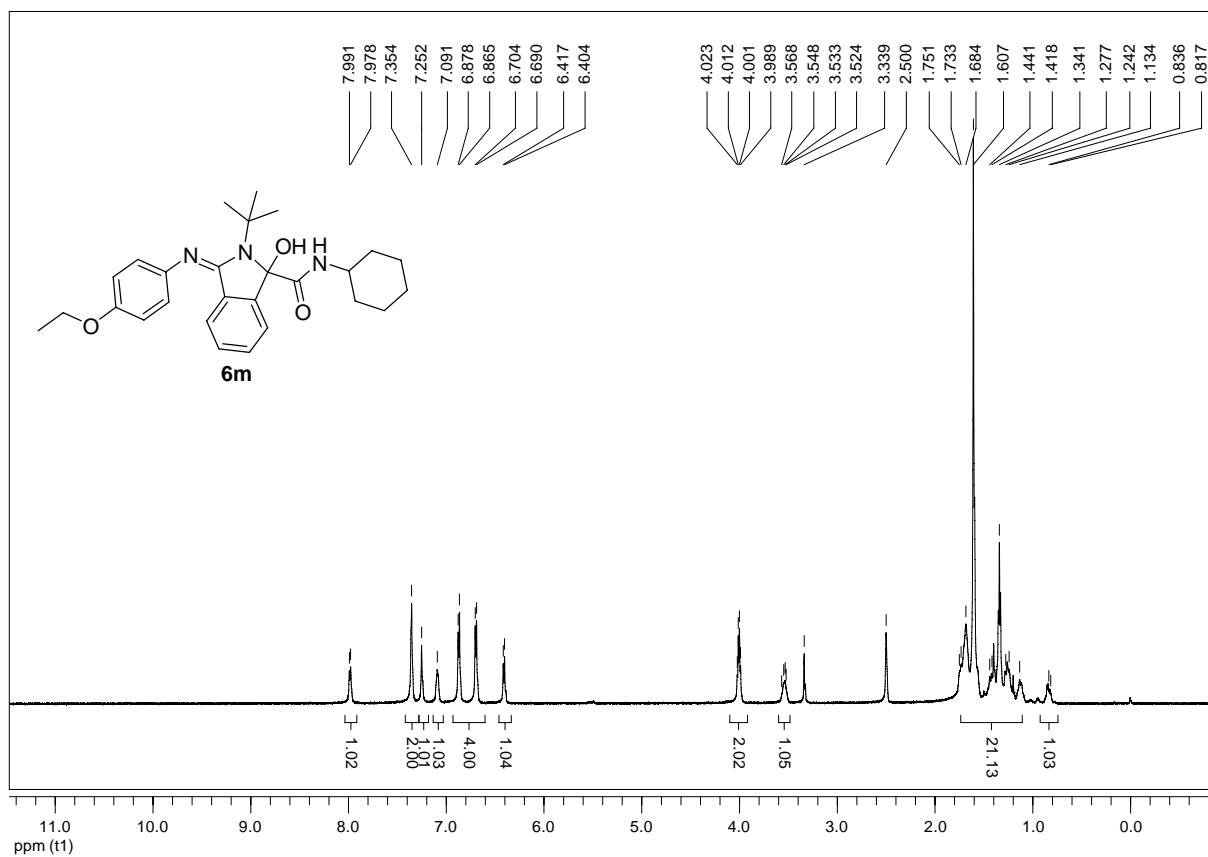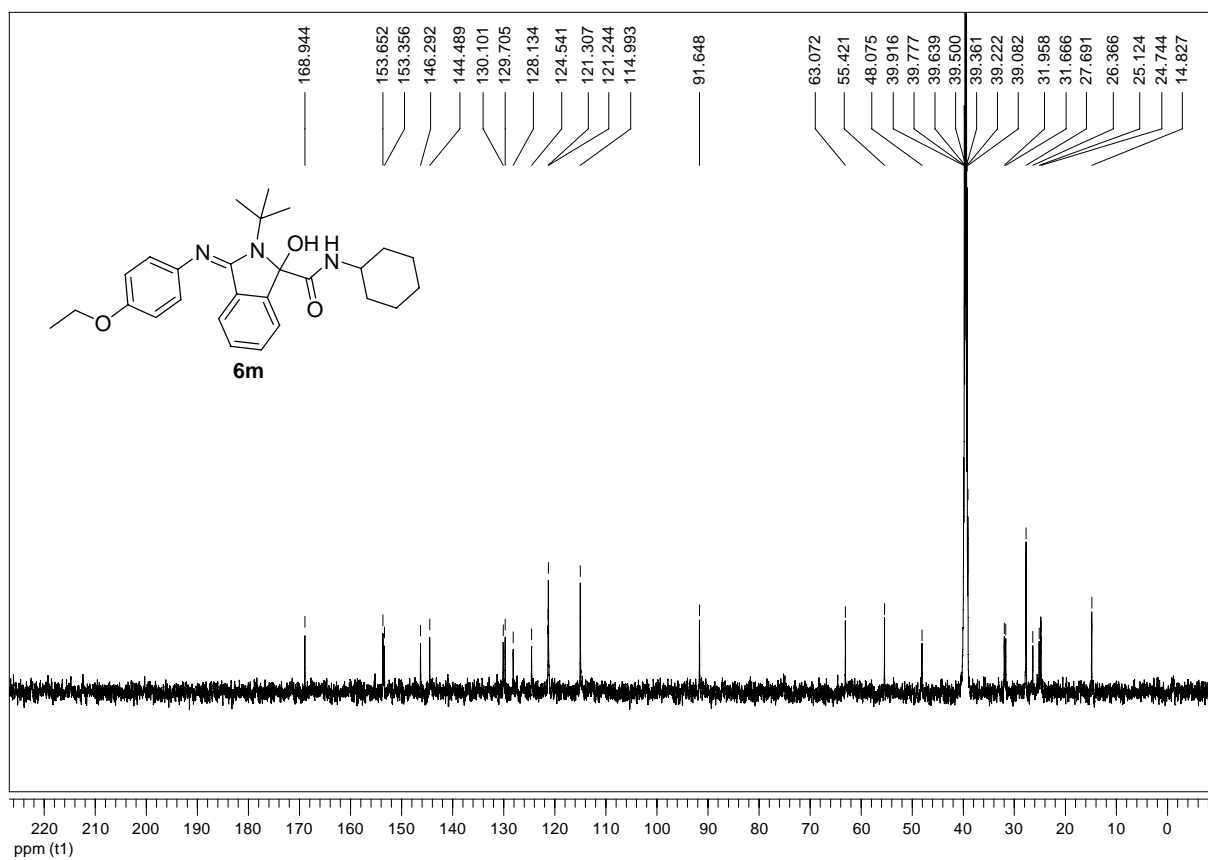

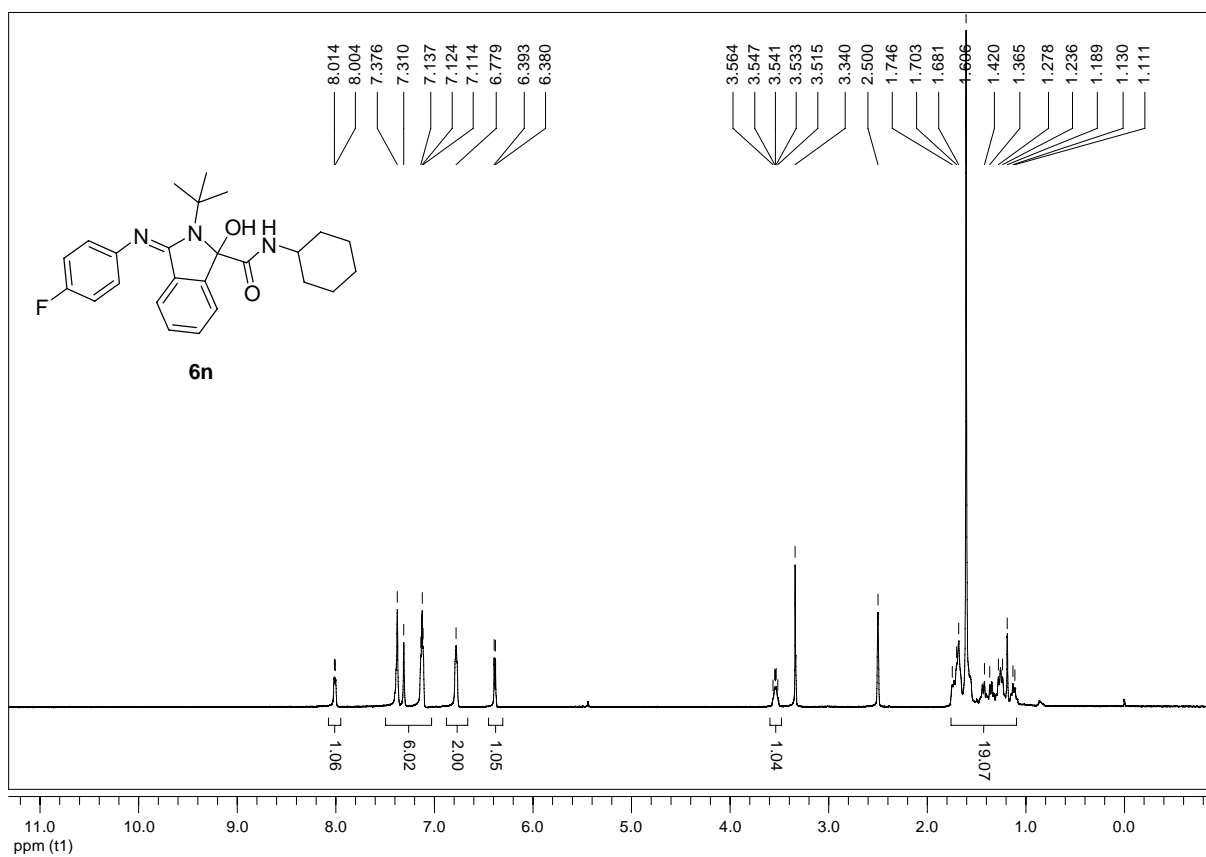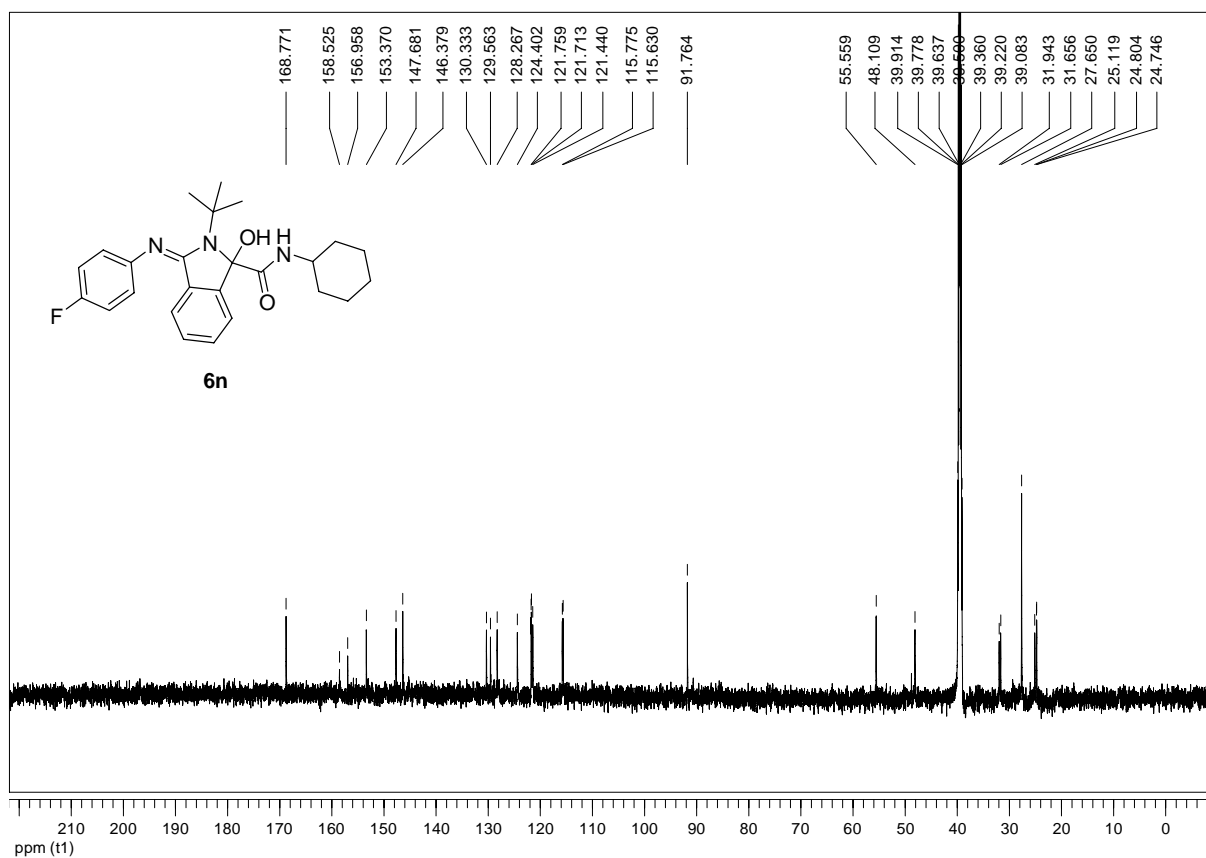

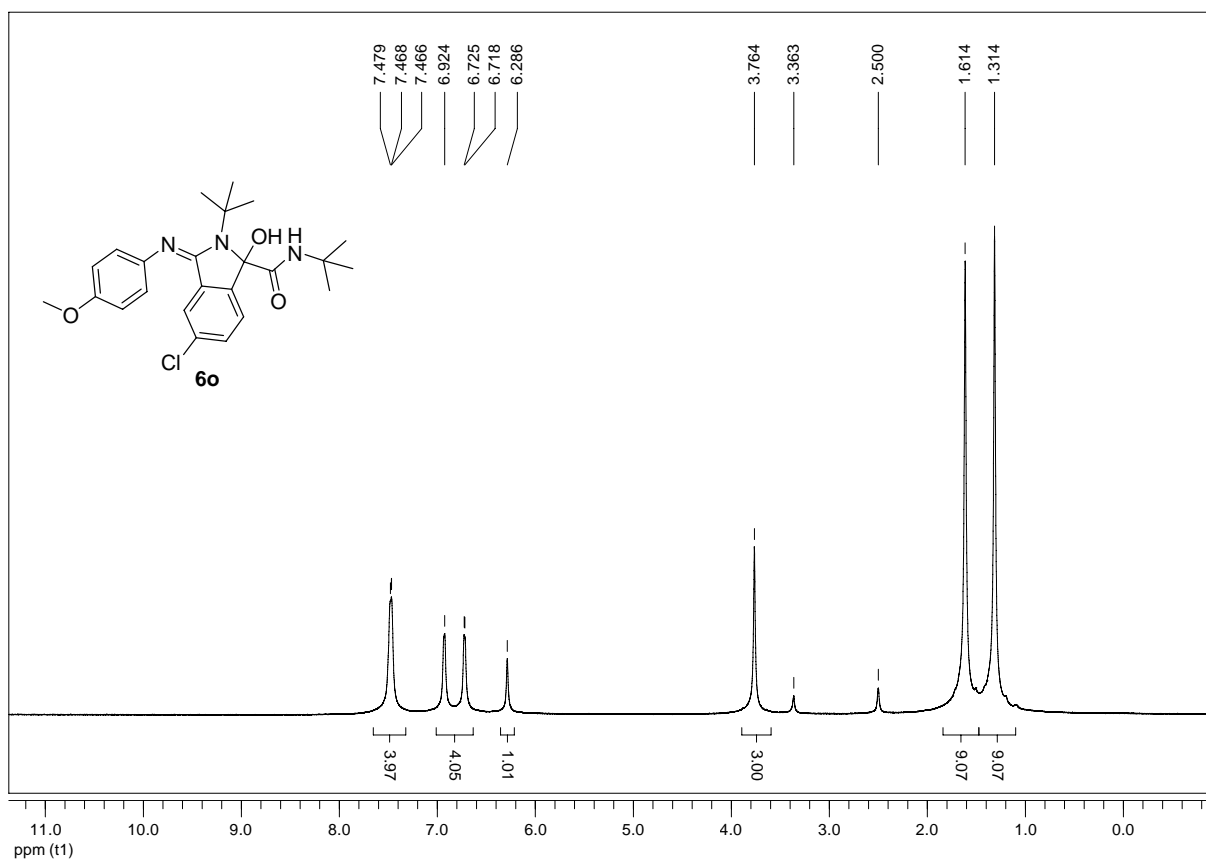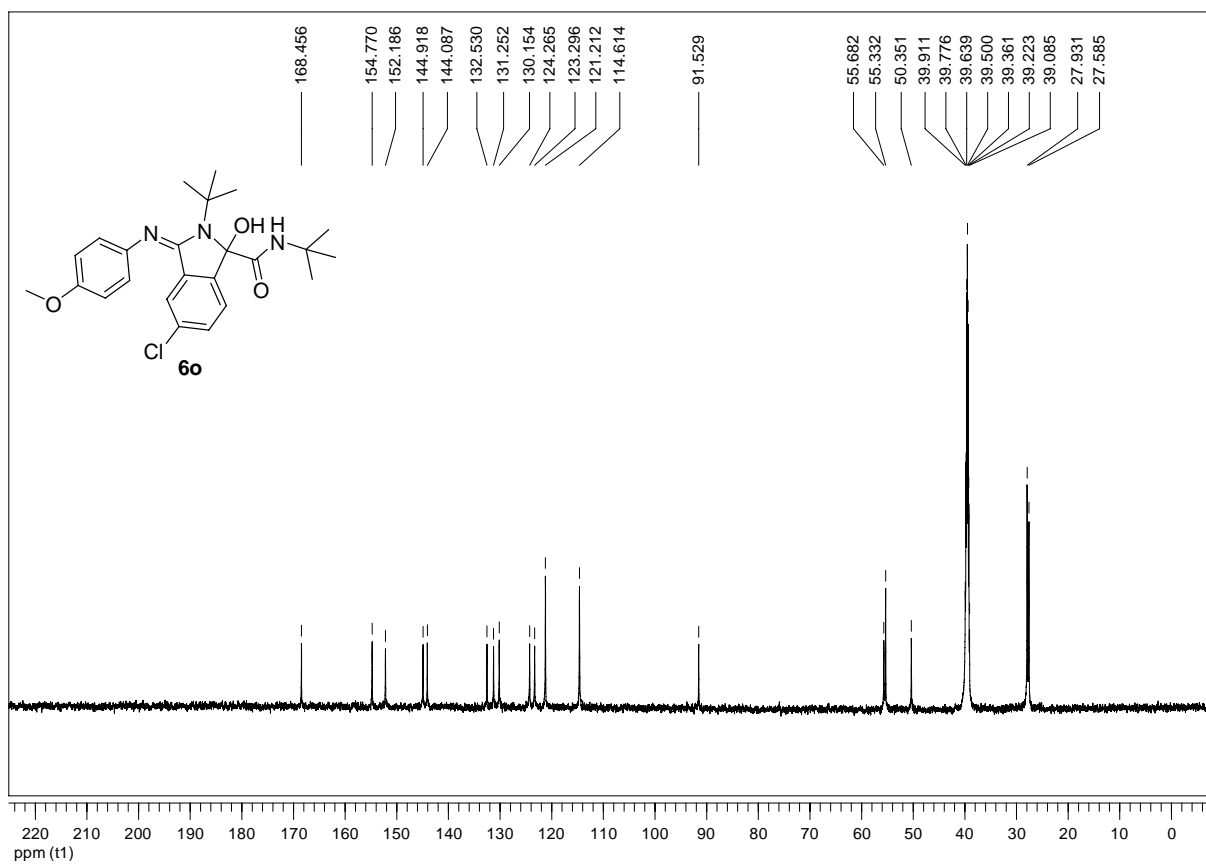

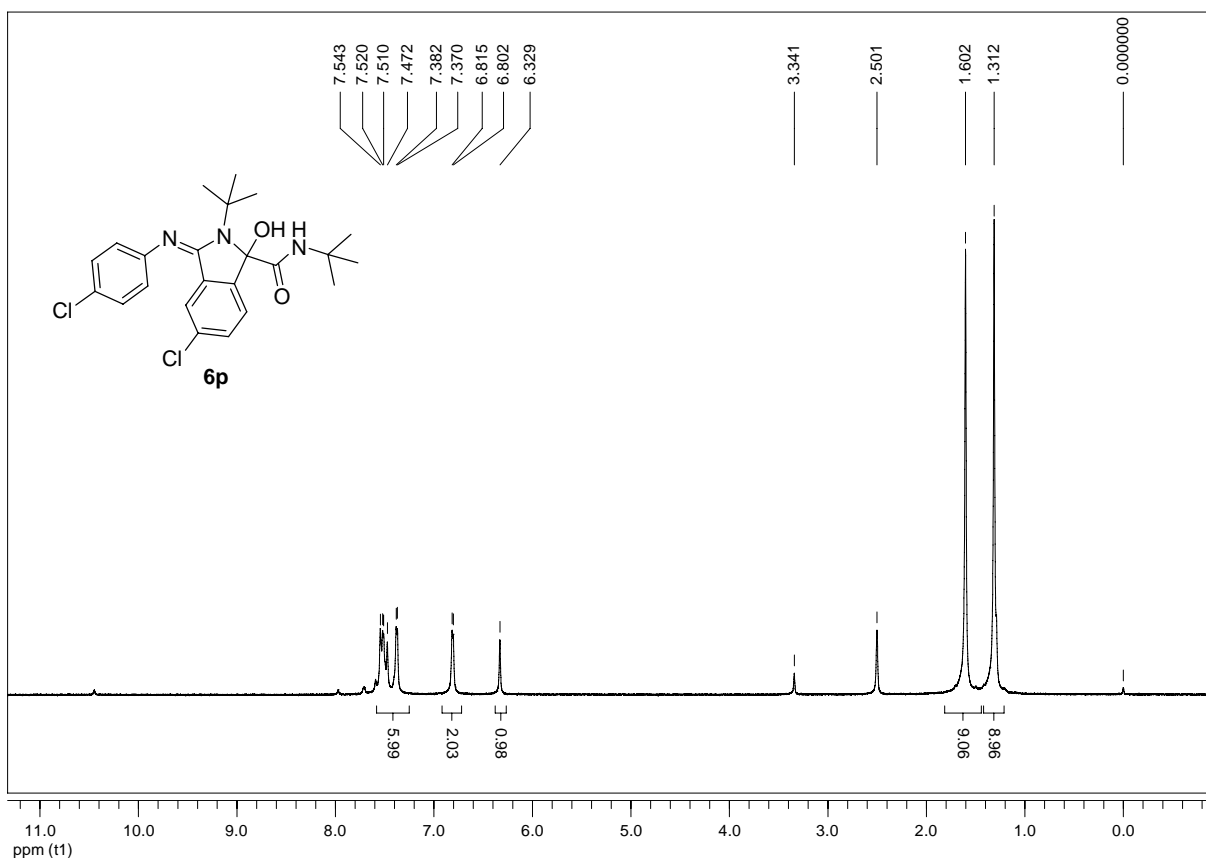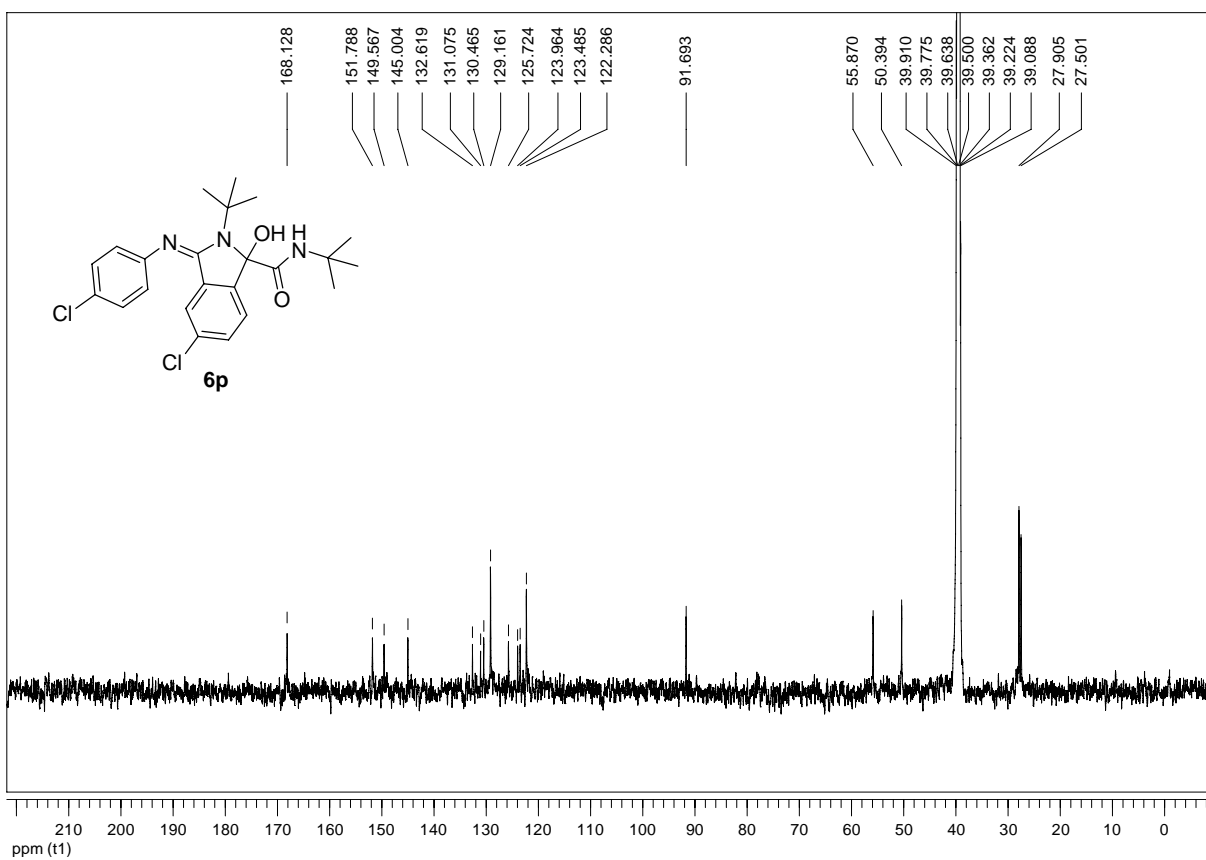

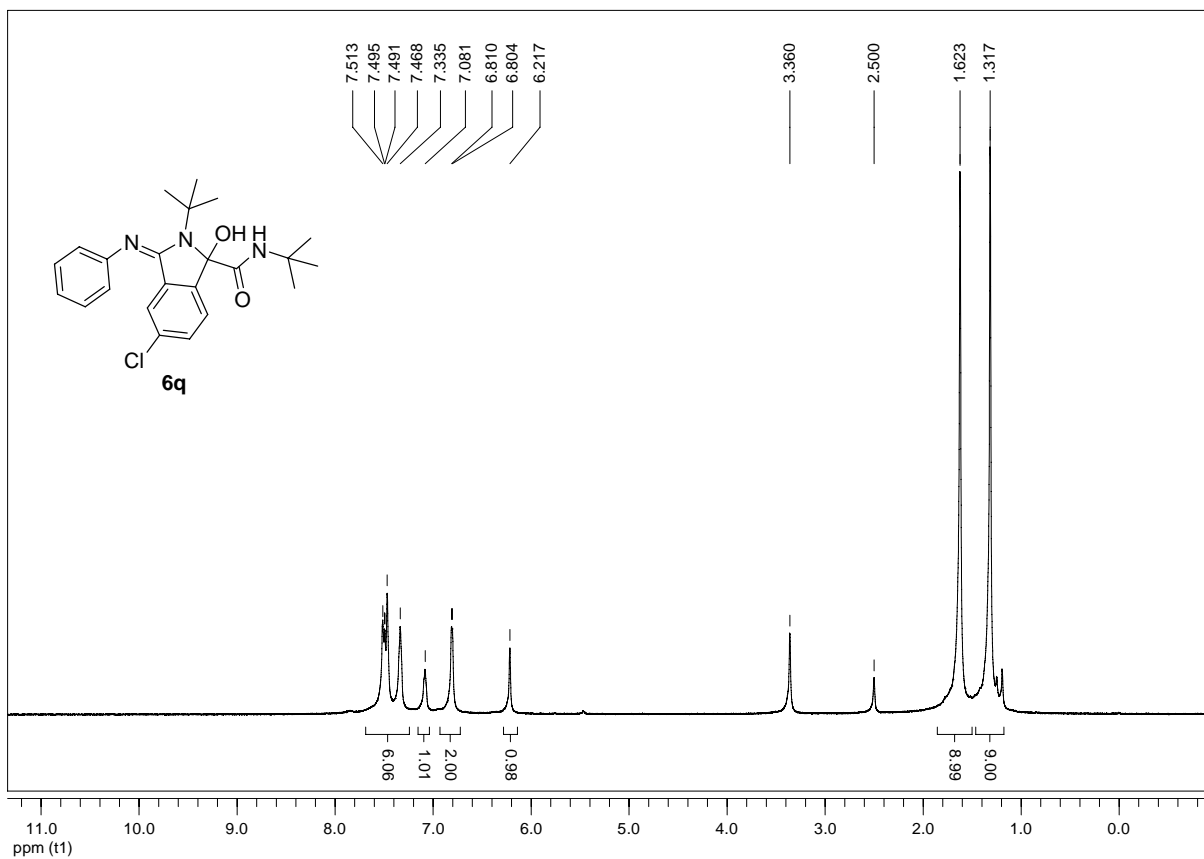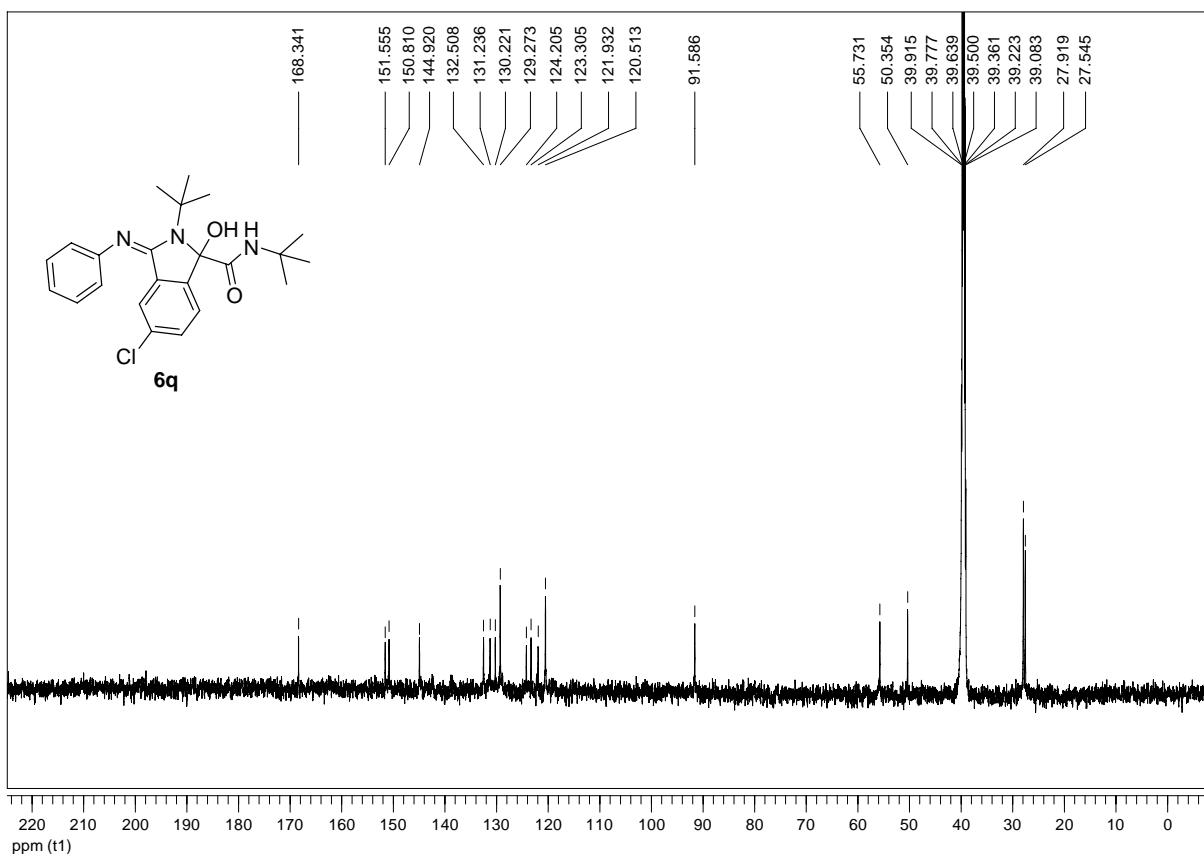

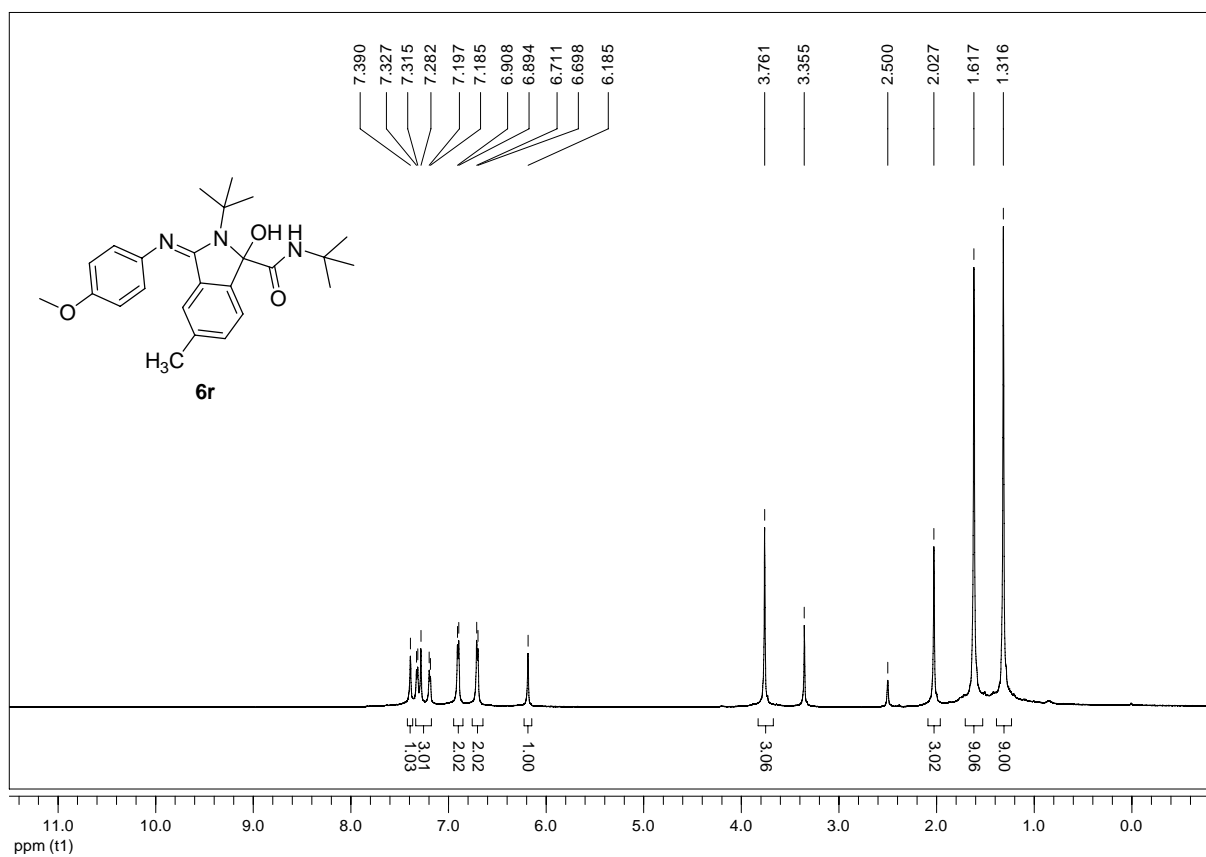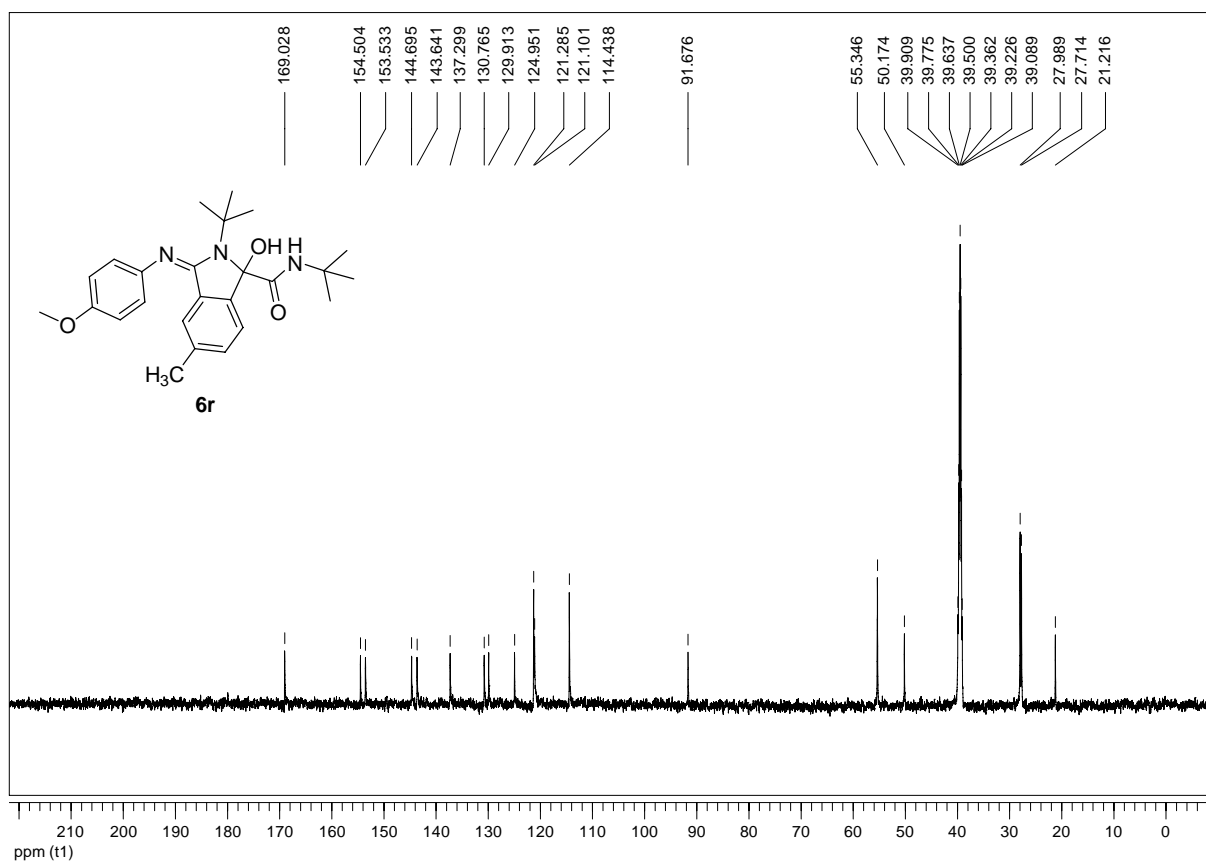



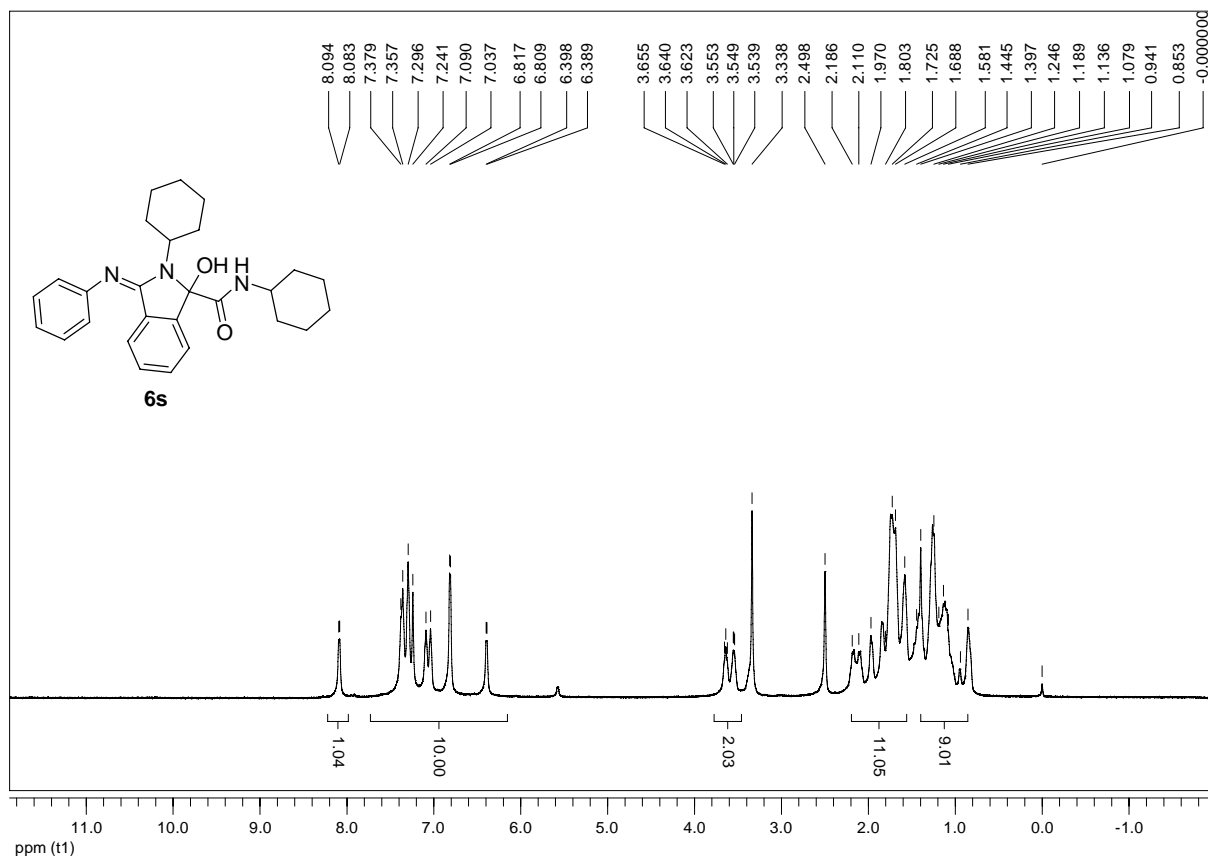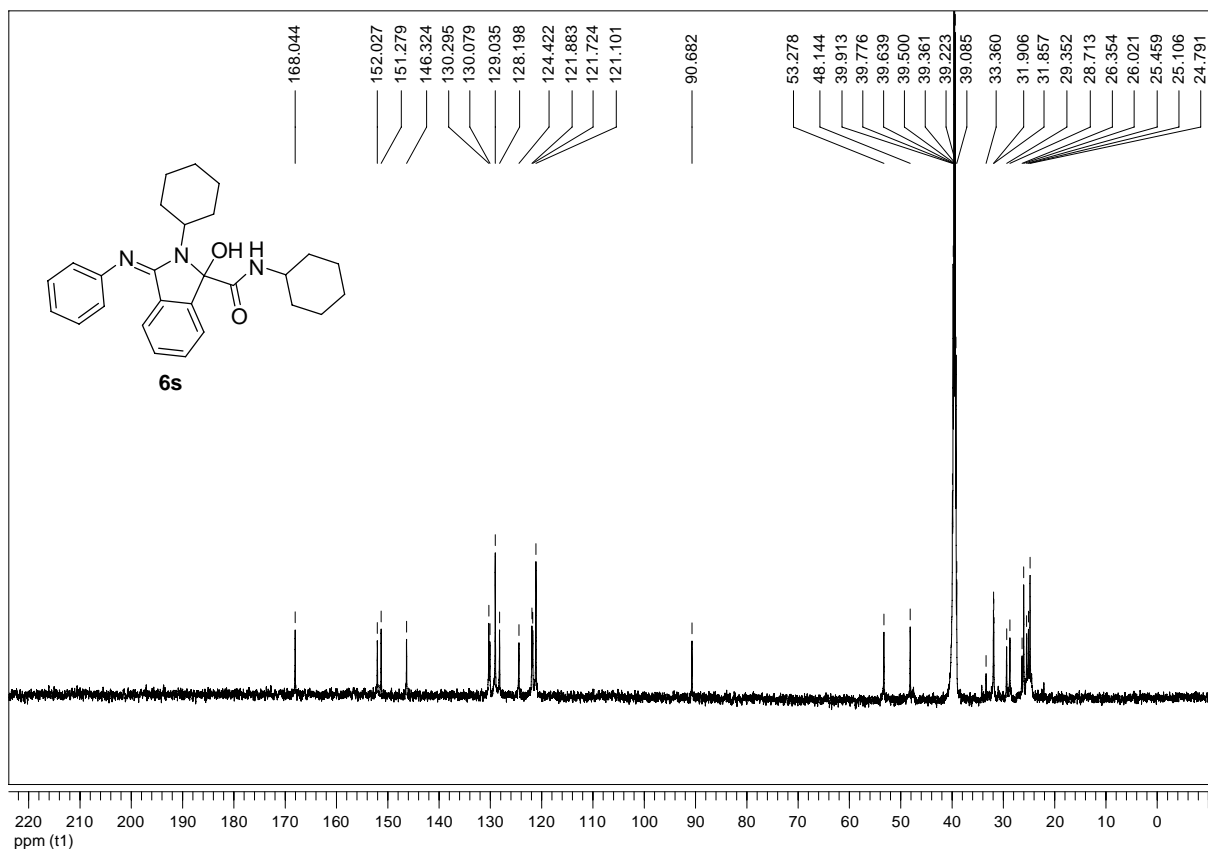

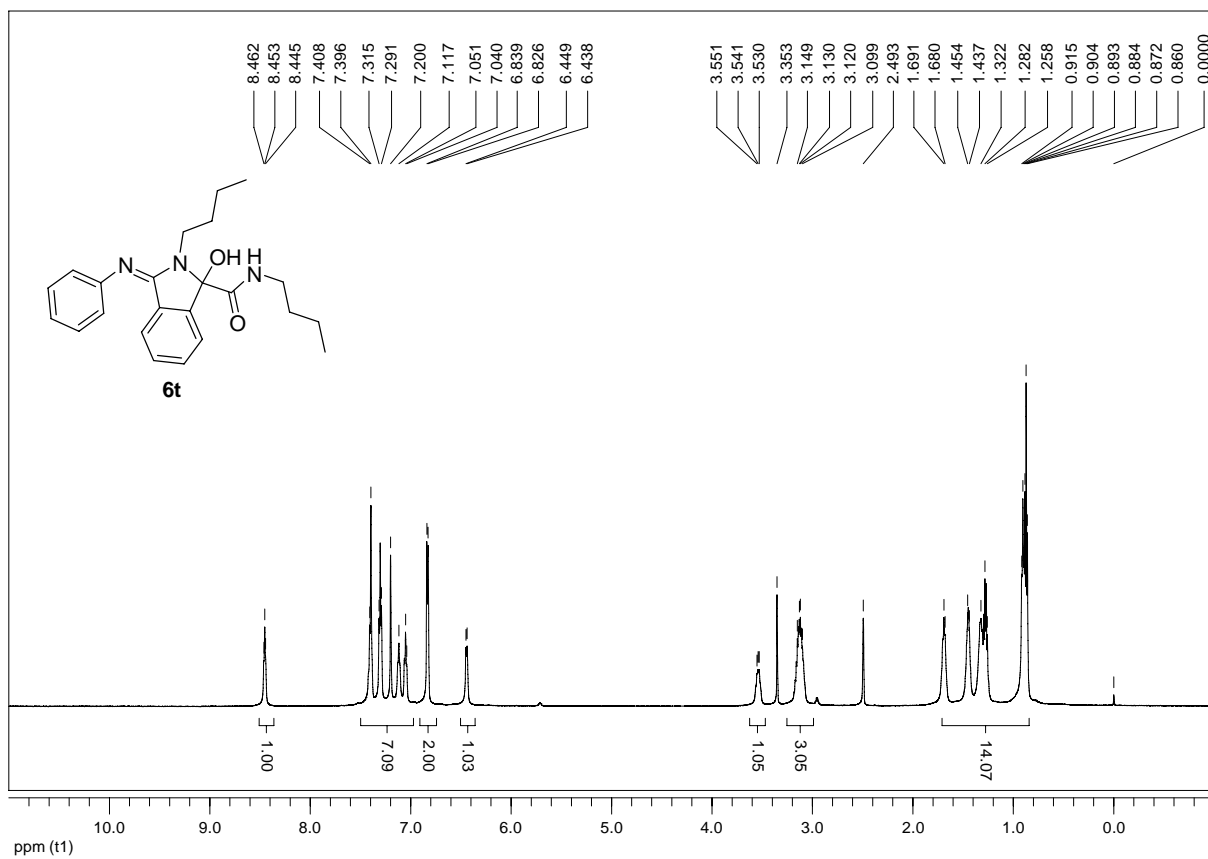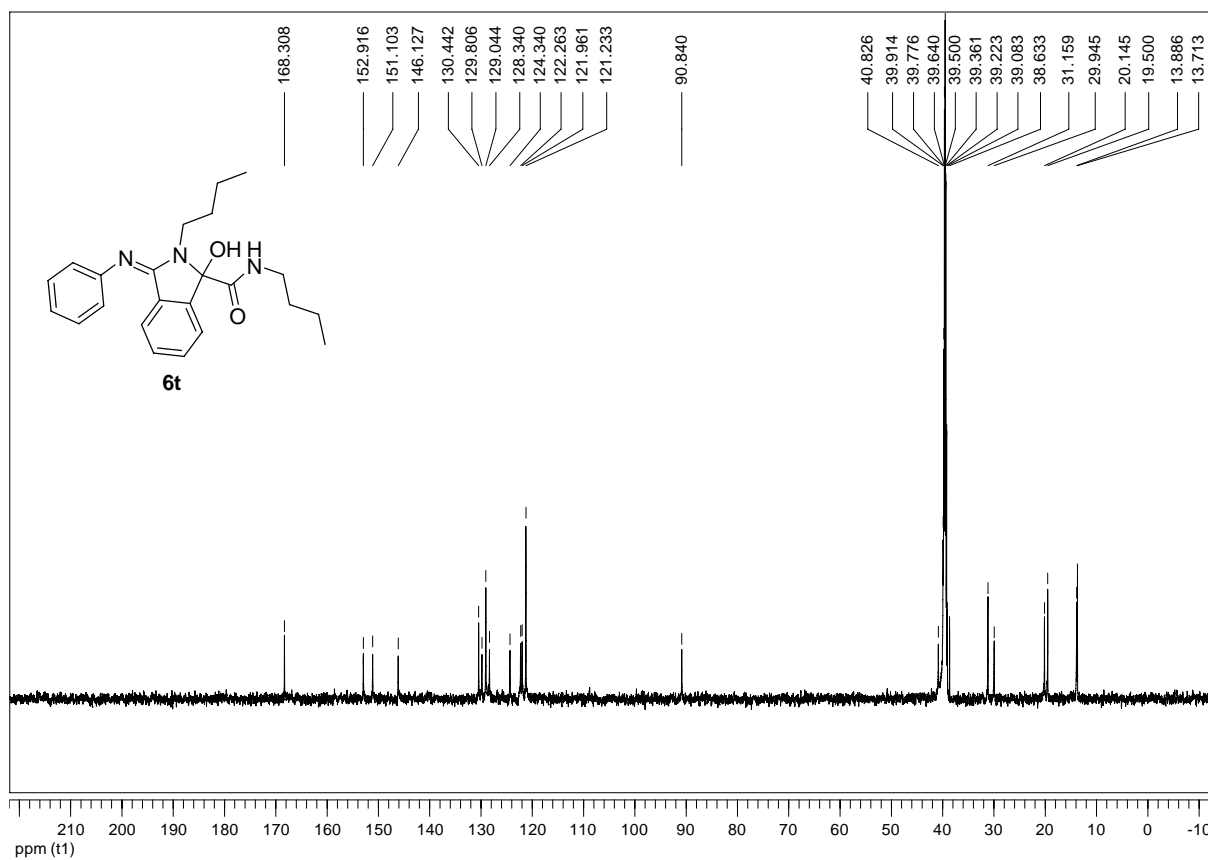

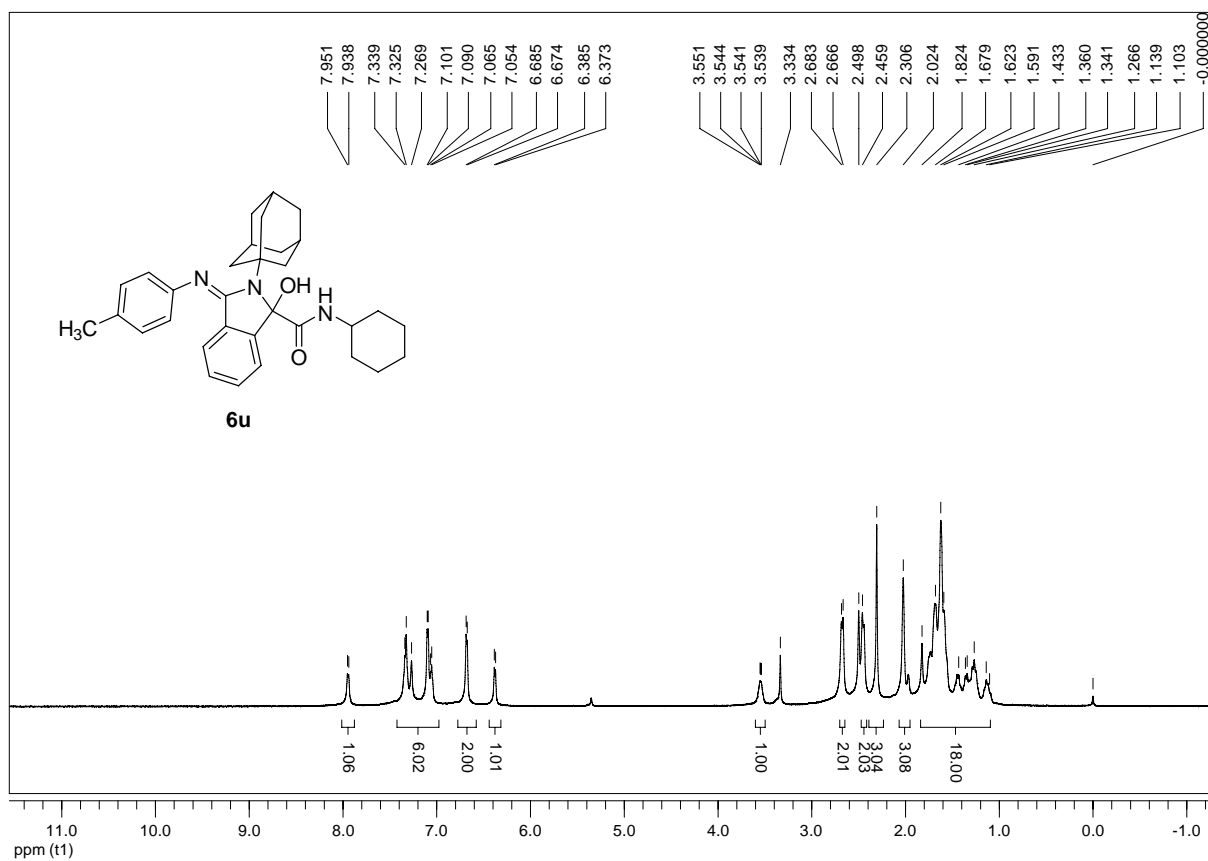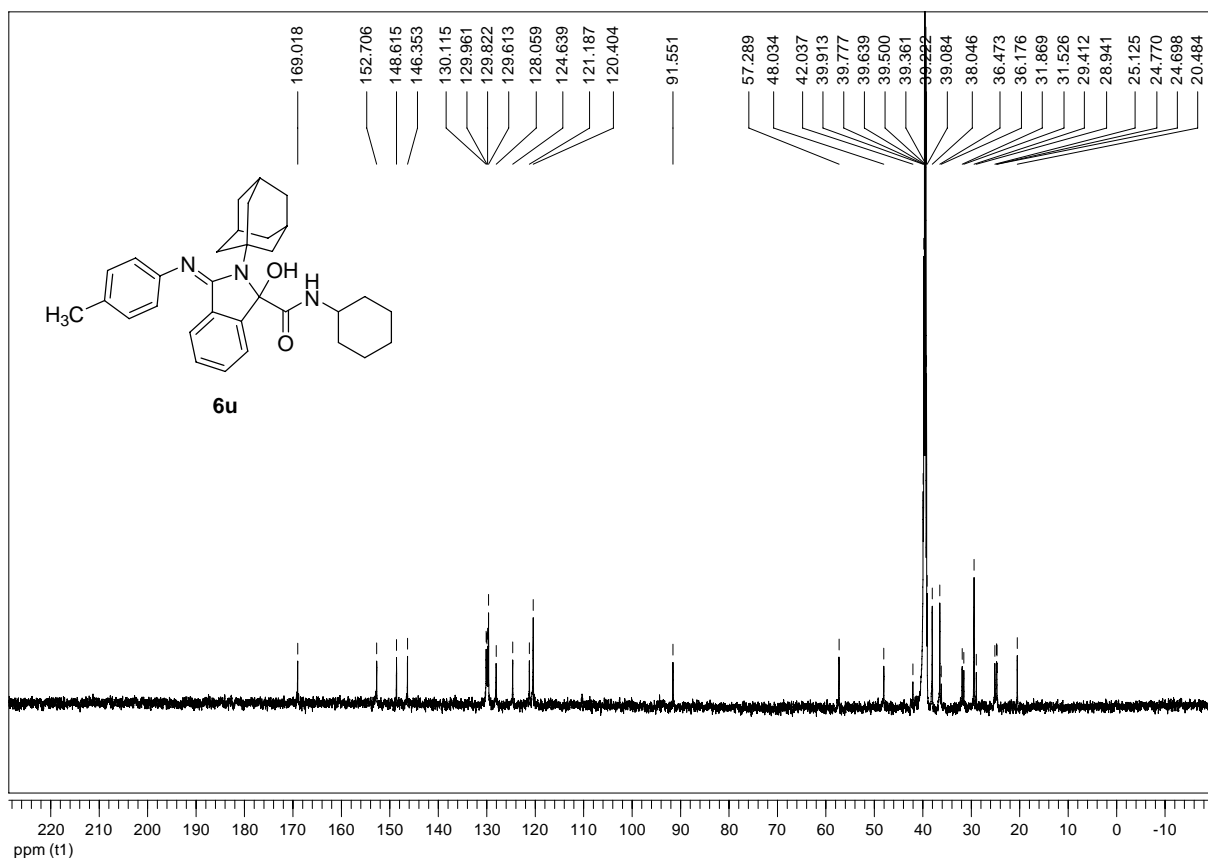

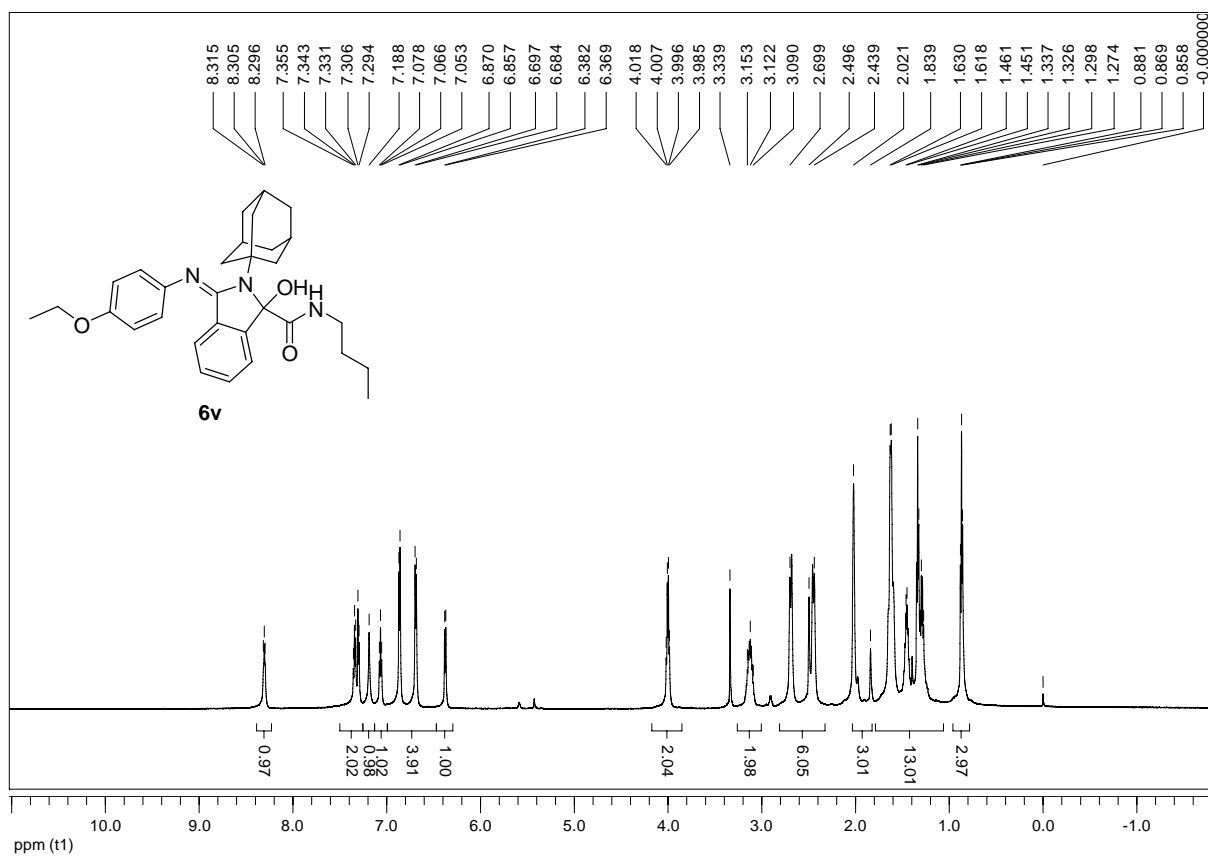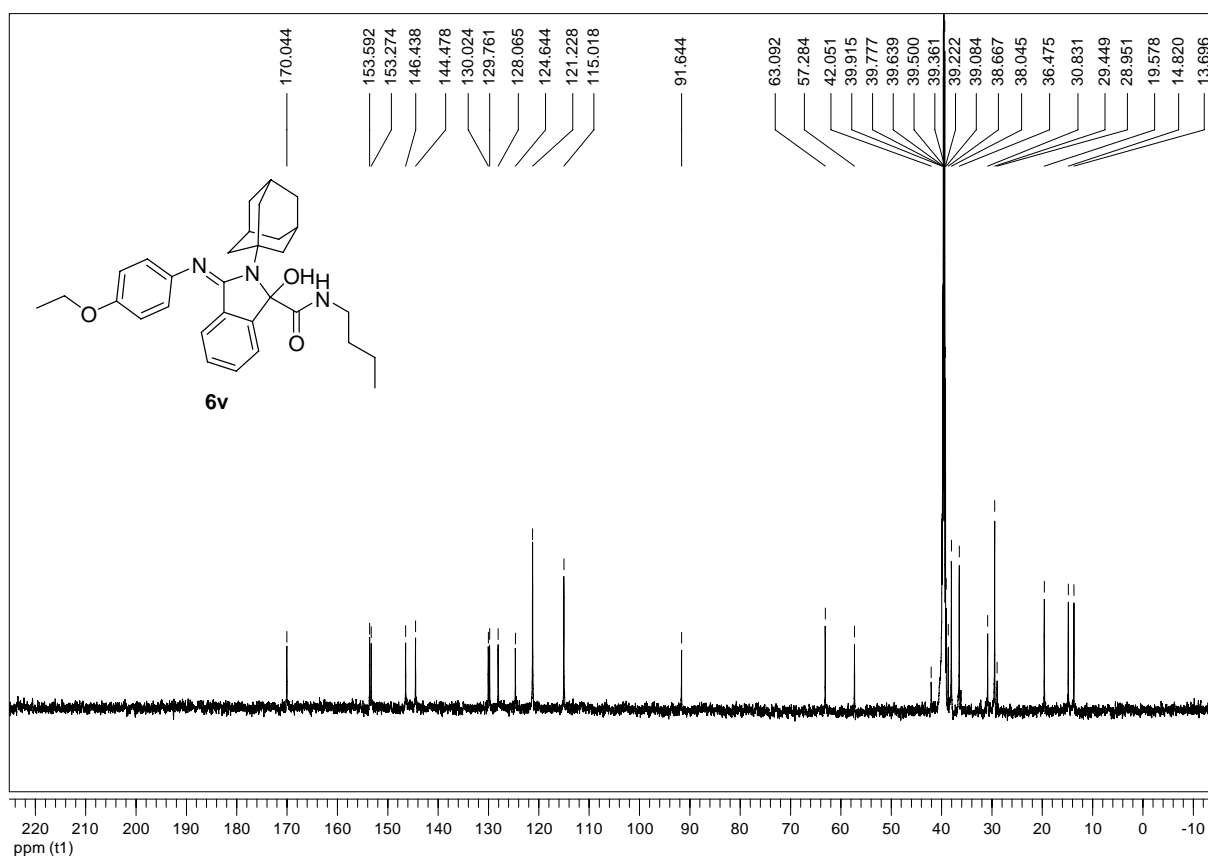

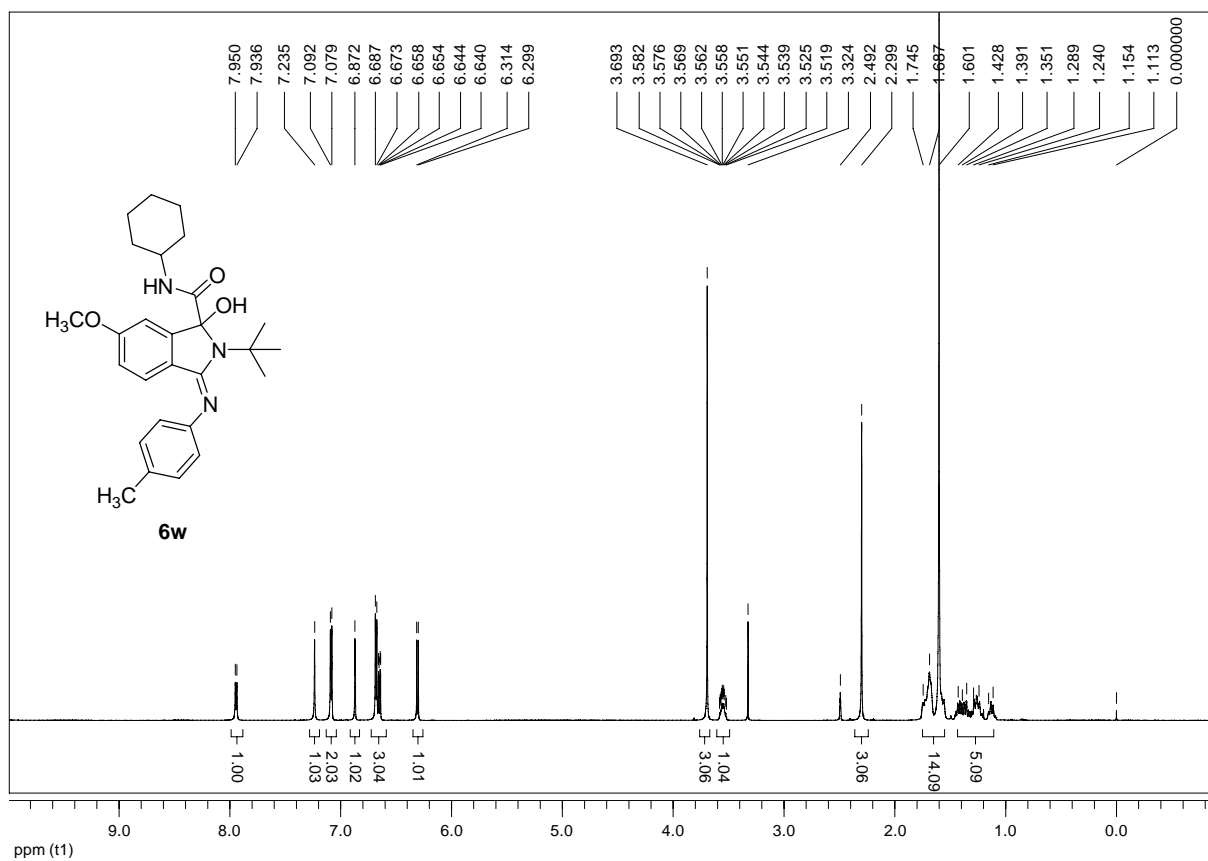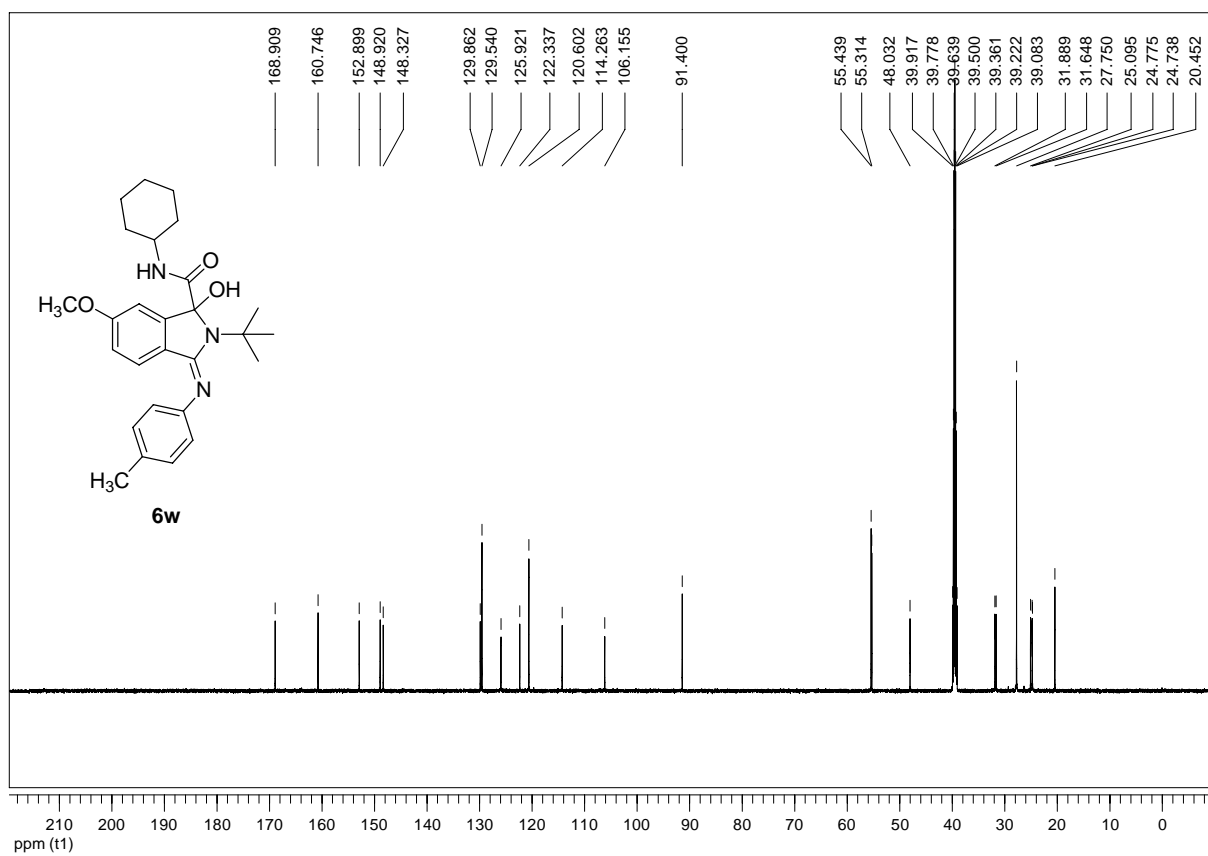

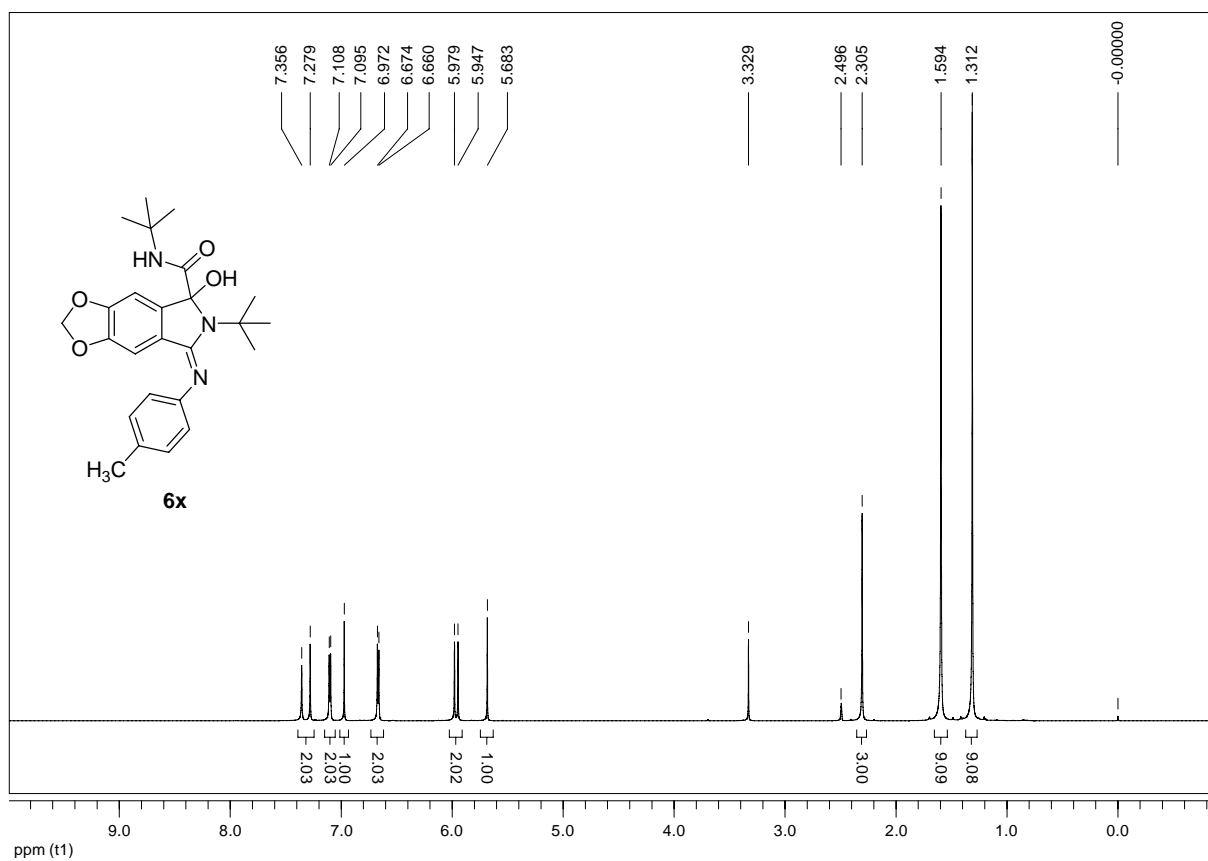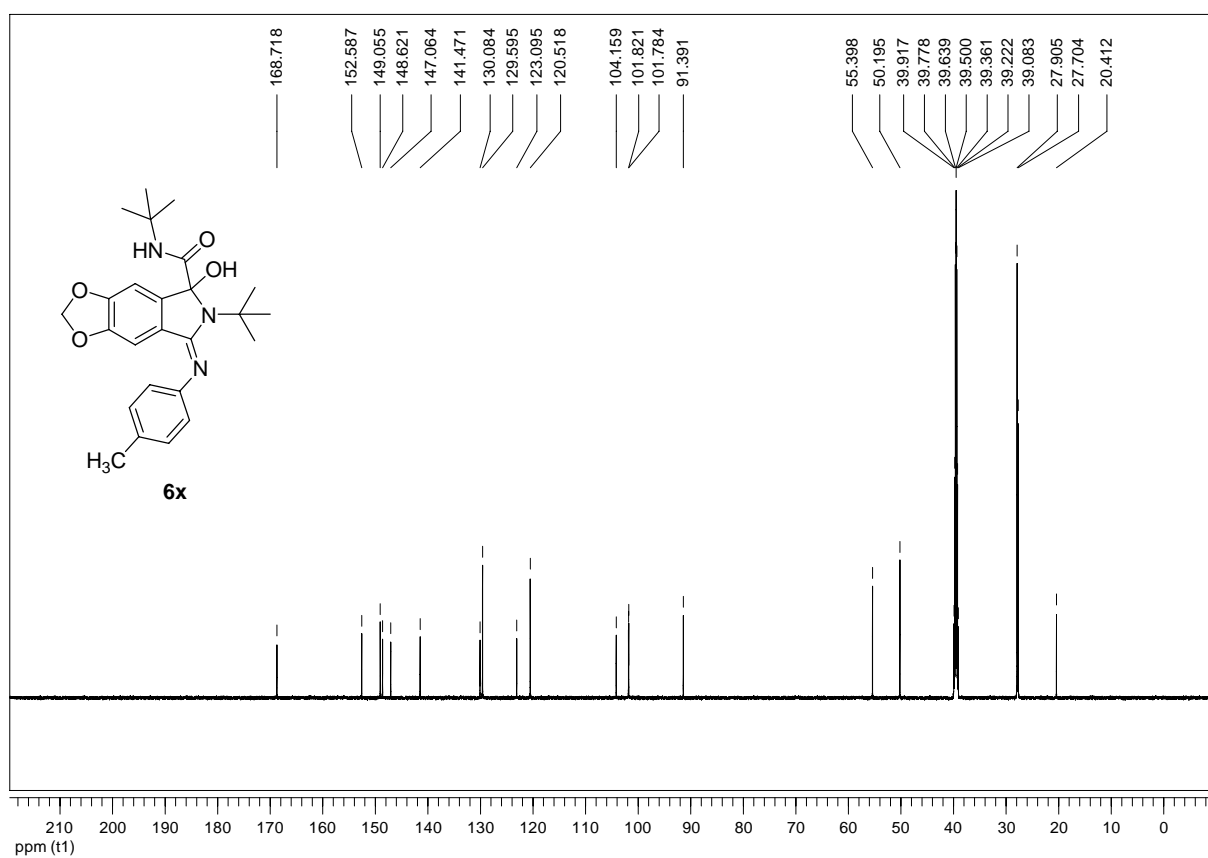

Supplement: c8ob01728j1.pdf [file c8ob01728j1.pdf]
